# Supplementary material for: MAGI1 Prevents Senescence and Promotes the DNA Damage Response in ER+ Breast Cancer
Source: Cells. 2023 Jul 25;12(15):1929. doi: 10.3390/cells12151929 (PMC10417439; doi:10.3390/cells12151929)
Supplement: Supplementary file 1 [file cells-12-01929-s001.zip]

Archive with 4 entries (4 files):
- Suppl_figure.pdf
- Suppl_Table_1_KD_effect_seqA_and_B.xlsx
- Suppl_Table_2_KD_effect_seqA_seqB_common_DN_UP.xlsx
- Suppl_Table_3_GO_BP_UP_DOWN.xlsx
