# Supplementary material for: MAGI1 Prevents Senescence and Promotes the DNA Damage Response in ER+ Breast Cancer
Source: Cells. 2023 Jul 25;12(15):1929. doi: 10.3390/cells12151929 (PMC10417439; doi:10.3390/cells12151929)
Supplement: Supplementary file 1 [file cells-12-01929-s001.zip › Suppl_Table_2_KD_effect_seqA_seqB_common_DN_UP.xlsx]

## Sheet: KD_effect_venn_dn
GeneID	logFC_kdA	logFC_kdB	adjP_seqA	adjP_seqB	Gene_Name	Gene_type	Description
ENSG00000125257	-0.244472	-0.28181	0.0127921	0.0109691	ABCC4	protein_coding	ATP binding cassette subfamily C member 4 [Source:HGNC Symbol;Acc:HGNC:55]
ENSG00000160179	-0.721428	-0.545165	8.51631e-07	9.91418e-06	ABCG1	protein_coding	ATP binding cassette subfamily G member 1 [Source:HGNC Symbol;Acc:HGNC:73]
ENSG00000272079	-0.364664	-0.22417	0.000182961	0.00783107	AC004233.2	lncRNA	novel transcript
ENSG00000247011	-0.60199	-0.823479	0.00374042	0.00143257	AC005920.1	lncRNA	novel transcript
ENSG00000273015	-0.221965	-0.164575	0.0035367	0.0275288	AC008124.1	lncRNA	novel transcript
ENSG00000261324	-1.07905	-1.16676	8.28534e-06	2.53388e-05	AC010168.2	lncRNA	novel transcript, overlapping HIST4H4
ENSG00000268864	-0.394208	-0.32755	0.0032385	0.0157474	AC011487.2	transcribed_unprocessed_pseudogene	solute carrier family 7 (cationic amino acid transporter, y+ system), member 2 (SLC7A2) pseudogene
ENSG00000259495	-0.384247	-0.620322	0.0409189	0.00716957	AC016705.2	lncRNA	novel transcript
ENSG00000177738	-0.388498	-0.500582	0.0113132	0.00565922	AC025171.1	lncRNA	novel transcript, sense overlapping to ANXA2R
ENSG00000215068	-0.354937	-0.326763	0.00218412	0.00699051	AC025171.2	lncRNA	novel transcript, antisense to ANXA2R
ENSG00000286388	-0.400273	-0.600536	0.0234484	0.00554624	AC026748.7	lncRNA	novel transcript
ENSG00000273456	-0.41823	-0.349892	0.00746926	0.0294227	AC064836.2	lncRNA	novel transcript
ENSG00000257337	-0.309376	-0.239561	0.000420644	0.00444302	AC068888.1	lncRNA	novel transcript, antisense to TENC1 & EIF4B
ENSG00000253361	-0.476234	-0.467336	0.00421762	0.00872252	AC069120.1	lncRNA	novel transcript
ENSG00000272791	-0.584694	-0.621651	0.0180859	0.0219203	AC073389.3	lncRNA	novel transcript
ENSG00000223523	-0.421305	-0.376035	0.000655118	0.00307205	AC092598.1	lncRNA	novel transcript, overlapping DIRC1
ENSG00000253982	-0.399358	-0.318343	0.000174809	0.00204054	AC100810.1	lncRNA	novel transcript
ENSG00000270177	-0.460774	-0.351938	0.00468484	0.030212	AC104109.2	lncRNA	novel transcript
ENSG00000288075	-1.37269	-0.936196	0.000136911	0.00375121	AC108519.1	lncRNA	novel transcript
ENSG00000266903	-0.34971	-0.2315	0.00398774	0.04697	AC243964.3	lncRNA	novel transcript, antisense to CEACAM16, CEACAM19, PVR & IGSF23
ENSG00000167315	-0.480704	-0.302537	0.000213617	0.00779416	ACAA2	protein_coding	acetyl-CoA acyltransferase 2 [Source:HGNC Symbol;Acc:HGNC:83]
ENSG00000111271	-0.358357	-0.206607	9.29341e-05	0.00658877	ACAD10	protein_coding	acyl-CoA dehydrogenase family member 10 [Source:HGNC Symbol;Acc:HGNC:21597]
ENSG00000144476	-1.09193	-0.858945	0.00011756	0.00161061	ACKR3	protein_coding	atypical chemokine receptor 3 [Source:HGNC Symbol;Acc:HGNC:23692]
ENSG00000161533	-0.167888	-0.141562	0.00276251	0.0129968	ACOX1	protein_coding	acyl-CoA oxidase 1 [Source:HGNC Symbol;Acc:HGNC:119]
ENSG00000123983	-0.23243	-0.190829	0.0108047	0.0422833	ACSL3	protein_coding	acyl-CoA synthetase long chain family member 3 [Source:HGNC Symbol;Acc:HGNC:3570]
ENSG00000154930	-0.487514	-0.421425	0.00101536	0.00525643	ACSS1	protein_coding	acyl-CoA synthetase short chain family member 1 [Source:HGNC Symbol;Acc:HGNC:16091]
ENSG00000229589	-0.393814	-0.630503	0.00586261	0.000975336	ACVR2B-AS1	lncRNA	ACVR2B antisense RNA 1 [Source:HGNC Symbol;Acc:HGNC:44161]
ENSG00000137845	-0.143575	-0.169895	0.0243769	0.0181047	ADAM10	protein_coding	ADAM metallopeptidase domain 10 [Source:HGNC Symbol;Acc:HGNC:188]
ENSG00000249421	-0.370837	-0.30509	0.00473185	0.0218978	ADAMTS19-AS1	lncRNA	ADAMTS19 antisense RNA 1 [Source:HGNC Symbol;Acc:HGNC:40797]
ENSG00000146416	-0.22298	-0.201436	0.00238215	0.00817941	AIG1	protein_coding	androgen induced 1 [Source:HGNC Symbol;Acc:HGNC:21607]
ENSG00000151320	-0.534966	-0.310048	5.61585e-06	0.000754733	AKAP6	protein_coding	A-kinase anchoring protein 6 [Source:HGNC Symbol;Acc:HGNC:376]
ENSG00000151632	-0.261957	-0.298409	0.0489416	0.0422097	AKR1C2	protein_coding	aldo-keto reductase family 1 member C2 [Source:HGNC Symbol;Acc:HGNC:385]
ENSG00000217275	-1.38971	-0.874636	1.23145e-05	0.000930713	AL031777.1	processed_pseudogene	ribosomal protein S10 (RPS10) pseudogene
ENSG00000282988	-0.810057	-0.621502	0.00253393	0.0186314	AL031777.2	protein_coding	novel protein
ENSG00000268628	-1.03854	-0.8398	0.00653624	0.0306102	AL121761.1	lncRNA	novel transcript
ENSG00000278784	-0.551346	-0.701504	0.00164678	0.00107751	AL136295.7	lncRNA	novel transcript
ENSG00000243155	-0.477071	-0.600826	0.0378537	0.0211165	AL162431.1	lncRNA	novel transcript
ENSG00000287769	-0.358258	-0.388042	0.0177008	0.019999	AL353748.3	lncRNA	novel transcript, antisense to SPIN1
ENSG00000275198	-0.38686	-0.287208	0.00801738	0.049701	AL512791.2	lncRNA	novel transcript
ENSG00000260855	-0.835126	-0.85341	0.0343709	0.0462837	AL591848.3	lncRNA	novel transcript
ENSG00000251602	-0.422215	-0.303461	0.00578239	0.0446522	AL928654.1	lncRNA	novel transcript, antisense to MTA1
ENSG00000106927	-0.514603	-0.324272	1.92957e-05	0.00128189	AMBP	protein_coding	alpha-1-microglobulin/bikunin precursor [Source:HGNC Symbol;Acc:HGNC:453]
ENSG00000139211	-0.733575	-0.231	1.20687e-05	0.0274237	AMIGO2	protein_coding	adhesion molecule with Ig like domain 2 [Source:HGNC Symbol;Acc:HGNC:24073]
ENSG00000214274	-0.912675	-0.30243	3.95224e-05	0.0448499	ANG	protein_coding	angiogenin [Source:HGNC Symbol;Acc:HGNC:483]
ENSG00000107890	-0.141118	-0.201564	0.0284726	0.00879904	ANKRD26	protein_coding	ankyrin repeat domain 26 [Source:HGNC Symbol;Acc:HGNC:29186]
ENSG00000183831	-0.674505	-0.427357	0.000856317	0.0203814	ANKRD45	protein_coding	ankyrin repeat domain 45 [Source:HGNC Symbol;Acc:HGNC:24786]
ENSG00000177119	-0.21375	-0.19614	0.00500903	0.0141603	ANO6	protein_coding	anoctamin 6 [Source:HGNC Symbol;Acc:HGNC:25240]
ENSG00000011201	-0.606048	-0.30104	2.04998e-06	0.000629327	ANOS1	protein_coding	anosmin 1 [Source:HGNC Symbol;Acc:HGNC:6211]
ENSG00000261578	-0.957788	-0.969481	0.00130241	0.0028355	AP003119.3	lncRNA	novel transcript, overlapping to TSKU
ENSG00000101474	-0.126599	-0.140071	0.0144908	0.0152232	APMAP	protein_coding	adipocyte plasma membrane associated protein [Source:HGNC Symbol;Acc:HGNC:13238]
ENSG00000179750	-0.689451	-0.304616	0.000149309	0.0309657	APOBEC3B	protein_coding	apolipoprotein B mRNA editing enzyme catalytic subunit 3B [Source:HGNC Symbol;Acc:HGNC:17352]
ENSG00000112379	-0.321849	-0.244374	0.000202517	0.00286633	ARFGEF3	protein_coding	ARFGEF family member 3 [Source:HGNC Symbol;Acc:HGNC:21213]
ENSG00000132254	-0.0973717	-0.112879	0.0315466	0.0254402	ARFIP2	protein_coding	ADP ribosylation factor interacting protein 2 [Source:HGNC Symbol;Acc:HGNC:17160]
ENSG00000146376	-0.46833	-0.265736	9.58579e-05	0.00726491	ARHGAP18	protein_coding	Rho GTPase activating protein 18 [Source:HGNC Symbol;Acc:HGNC:21035]
ENSG00000032219	-0.161238	-0.16189	0.0174517	0.0273818	ARID4A	protein_coding	AT-rich interaction domain 4A [Source:HGNC Symbol;Acc:HGNC:9885]
ENSG00000175906	-0.742488	-0.233908	1.06469e-05	0.0253755	ARL4D	protein_coding	ADP ribosylation factor like GTPase 4D [Source:HGNC Symbol;Acc:HGNC:656]
ENSG00000113369	-0.770419	-1.06157	8.72097e-06	4.82857e-06	ARRDC3	protein_coding	arrestin domain containing 3 [Source:HGNC Symbol;Acc:HGNC:29263]
ENSG00000257316	-0.445846	-0.394275	0.0162111	0.0434139	ASS1P14	processed_pseudogene	argininosuccinate synthetase 1 pseudogene 14 [Source:HGNC Symbol;Acc:HGNC:764]
ENSG00000213676	-0.210495	-0.134674	0.000563541	0.0145127	ATF6B	protein_coding	activating transcription factor 6 beta [Source:HGNC Symbol;Acc:HGNC:2349]
ENSG00000143153	-0.288345	-0.193204	0.000705689	0.0137915	ATP1B1	protein_coding	ATPase Na+/K+ transporting subunit beta 1 [Source:HGNC Symbol;Acc:HGNC:804]
ENSG00000064270	-0.554383	-0.333659	4.3841e-05	0.00305353	ATP2C2	protein_coding	ATPase secretory pathway Ca2+ transporting 2 [Source:HGNC Symbol;Acc:HGNC:29103]
ENSG00000071553	-0.153587	-0.240469	0.00346816	0.000638029	ATP6AP1	protein_coding	ATPase H+ transporting accessory protein 1 [Source:HGNC Symbol;Acc:HGNC:868]
ENSG00000033627	-0.133555	-0.210094	0.0404016	0.00812573	ATP6V0A1	protein_coding	ATPase H+ transporting V0 subunit a1 [Source:HGNC Symbol;Acc:HGNC:865]
ENSG00000114573	-0.137319	-0.111495	0.00445613	0.0218978	ATP6V1A	protein_coding	ATPase H+ transporting V1 subunit A [Source:HGNC Symbol;Acc:HGNC:851]
ENSG00000143515	-0.287741	-0.38079	0.0107971	0.00469383	ATP8B2	protein_coding	ATPase phospholipid transporting 8B2 [Source:HGNC Symbol;Acc:HGNC:13534]
ENSG00000105778	-0.122838	-0.113992	0.00488163	0.01317	AVL9	protein_coding	AVL9 cell migration associated [Source:HGNC Symbol;Acc:HGNC:28994]
ENSG00000095739	-0.373148	-0.227912	1.94648e-05	0.00152119	BAMBI	protein_coding	BMP and activin membrane bound inhibitor [Source:HGNC Symbol;Acc:HGNC:30251]
ENSG00000187244	-0.50643	-0.369552	0.000152937	0.0028622	BCAM	protein_coding	basal cell adhesion molecule (Lutheran blood group) [Source:HGNC Symbol;Acc:HGNC:6722]
ENSG00000186174	-0.173194	-0.207775	0.0255665	0.017912	BCL9L	protein_coding	BCL9 like [Source:HGNC Symbol;Acc:HGNC:23688]
ENSG00000126581	-0.117937	-0.106464	0.021588	0.0495097	BECN1	protein_coding	beclin 1 [Source:HGNC Symbol;Acc:HGNC:1034]
ENSG00000063169	-0.389257	-0.299463	0.00675976	0.0387105	BICRA	protein_coding	BRD4 interacting chromatin remodeling complex associated protein [Source:HGNC Symbol;Acc:HGNC:4332]
ENSG00000166780	-0.611227	-0.282234	0.000110891	0.0211083	BMERB1	protein_coding	bMERB domain containing 1 [Source:HGNC Symbol;Acc:HGNC:19213]
ENSG00000157764	-0.253288	-0.242022	0.00281269	0.00709318	BRAF	protein_coding	B-Raf proto-oncogene, serine/threonine kinase [Source:HGNC Symbol;Acc:HGNC:1097]
ENSG00000096070	-0.225454	-0.153861	0.00399125	0.0420489	BRPF3	protein_coding	bromodomain and PHD finger containing 3 [Source:HGNC Symbol;Acc:HGNC:14256]
ENSG00000159388	-0.745739	-0.218569	4.54882e-06	0.0202244	BTG2	protein_coding	BTG anti-proliferation factor 2 [Source:HGNC Symbol;Acc:HGNC:1131]
ENSG00000186665	-0.374268	-0.364883	0.00120402	0.00318456	C17orf58	protein_coding	chromosome 17 open reading frame 58 [Source:HGNC Symbol;Acc:HGNC:27568]
ENSG00000188493	-0.156431	-0.244485	0.0427867	0.00890176	C19orf54	protein_coding	chromosome 19 open reading frame 54 [Source:HGNC Symbol;Acc:HGNC:24758]
ENSG00000162817	-0.275538	-0.309976	0.00105252	0.00140345	C1orf115	protein_coding	chromosome 1 open reading frame 115 [Source:HGNC Symbol;Acc:HGNC:25873]
ENSG00000188112	-0.320422	-0.272409	0.0093677	0.032929	C6orf132	protein_coding	chromosome 6 open reading frame 132 [Source:HGNC Symbol;Acc:HGNC:21288]
ENSG00000204439	-0.232232	-0.163628	0.00311262	0.0313697	C6orf47	protein_coding	chromosome 6 open reading frame 47 [Source:HGNC Symbol;Acc:HGNC:19076]
ENSG00000241852	-0.308823	-0.382804	0.0478685	0.0292883	C8orf58	protein_coding	chromosome 8 open reading frame 58 [Source:HGNC Symbol;Acc:HGNC:32233]
ENSG00000169239	-0.491062	-0.248422	2.97534e-05	0.00554624	CA5B	protein_coding	carbonic anhydrase 5B [Source:HGNC Symbol;Acc:HGNC:1378]
ENSG00000007402	-0.690387	-0.806669	0.000607089	0.000693285	CACNA2D2	protein_coding	calcium voltage-gated channel auxiliary subunit alpha2delta 2 [Source:HGNC Symbol;Acc:HGNC:1400]
ENSG00000183049	-0.16026	-0.34906	0.0103282	0.000276882	CAMK1D	protein_coding	calcium/calmodulin dependent protein kinase ID [Source:HGNC Symbol;Acc:HGNC:19341]
ENSG00000145349	-0.252581	-0.257663	0.00159516	0.00318456	CAMK2D	protein_coding	calcium/calmodulin dependent protein kinase II delta [Source:HGNC Symbol;Acc:HGNC:1462]
ENSG00000162545	-0.793847	-0.387935	7.81642e-07	0.00011352	CAMK2N1	protein_coding	calcium/calmodulin dependent protein kinase II inhibitor 1 [Source:HGNC Symbol;Acc:HGNC:24190]
ENSG00000126247	-0.0970475	-0.0988509	0.0142844	0.0214151	CAPNS1	protein_coding	calpain small subunit 1 [Source:HGNC Symbol;Acc:HGNC:1481]
ENSG00000077549	-0.0805453	-0.0793368	0.0318095	0.0495097	CAPZB	protein_coding	capping actin protein of muscle Z-line subunit beta [Source:HGNC Symbol;Acc:HGNC:1491]
ENSG00000132906	-0.390692	-0.288308	0.000464191	0.00619479	CASP9	protein_coding	caspase 9 [Source:HGNC Symbol;Acc:HGNC:1511]
ENSG00000114423	-0.143984	-0.169411	0.0204164	0.0157286	CBLB	protein_coding	Cbl proto-oncogene B [Source:HGNC Symbol;Acc:HGNC:1542]
ENSG00000183741	-0.436329	-0.459311	7.40294e-05	0.000197018	CBX6	protein_coding	chromobox 6 [Source:HGNC Symbol;Acc:HGNC:1556]
ENSG00000179604	-0.293099	-0.149018	0.000813547	0.048891	CDC42EP4	protein_coding	CDC42 effector protein 4 [Source:HGNC Symbol;Acc:HGNC:17147]
ENSG00000143418	-0.268278	-0.18469	0.00087817	0.0143582	CERS2	protein_coding	ceramide synthase 2 [Source:HGNC Symbol;Acc:HGNC:14076]
ENSG00000113163	-0.22434	-0.182804	0.00159157	0.00979867	CERT1	protein_coding	ceramide transporter 1 [Source:HGNC Symbol;Acc:HGNC:2205]
ENSG00000170004	-0.232052	-0.188007	0.00295173	0.0164096	CHD3	protein_coding	chromodomain helicase DNA binding protein 3 [Source:HGNC Symbol;Acc:HGNC:1918]
ENSG00000110721	-0.338803	-0.185088	0.000267086	0.017912	CHKA	protein_coding	choline kinase alpha [Source:HGNC Symbol;Acc:HGNC:1937]
ENSG00000090539	-0.926309	-0.720348	0.000167017	0.00223452	CHRD	protein_coding	chordin [Source:HGNC Symbol;Acc:HGNC:1949]
ENSG00000159208	-0.405262	-0.216601	0.00102022	0.0461393	CIART	protein_coding	circadian associated repressor of transcription [Source:HGNC Symbol;Acc:HGNC:25200]
ENSG00000171603	-0.173885	-0.170556	0.00896374	0.0169982	CLSTN1	protein_coding	calsyntenin 1 [Source:HGNC Symbol;Acc:HGNC:17447]
ENSG00000158258	-0.516887	-0.680855	0.00871711	0.00394452	CLSTN2	protein_coding	calsyntenin 2 [Source:HGNC Symbol;Acc:HGNC:17448]
ENSG00000168434	-0.190808	-0.131673	0.00477878	0.0457487	COG7	protein_coding	component of oligomeric golgi complex 7 [Source:HGNC Symbol;Acc:HGNC:18622]
ENSG00000187955	-0.65471	-0.656863	0.00374042	0.00704476	COL14A1	protein_coding	collagen type XIV alpha 1 chain [Source:HGNC Symbol;Acc:HGNC:2191]
ENSG00000196739	-0.456406	-0.291916	0.000694367	0.0168314	COL27A1	protein_coding	collagen type XXVII alpha 1 chain [Source:HGNC Symbol;Acc:HGNC:22986]
ENSG00000158270	-0.597938	-0.309896	5.98197e-05	0.00817175	COLEC12	protein_coding	collectin subfamily member 12 [Source:HGNC Symbol;Acc:HGNC:16016]
ENSG00000122218	-0.0803812	-0.10566	0.031999	0.0149384	COPA	protein_coding	COPI coat complex subunit alpha [Source:HGNC Symbol;Acc:HGNC:2230]
ENSG00000106789	-0.493313	-0.199643	0.000119119	0.0390724	CORO2A	protein_coding	coronin 2A [Source:HGNC Symbol;Acc:HGNC:2255]
ENSG00000006695	-0.121913	-0.143965	0.0278549	0.0207636	COX10	protein_coding	cytochrome c oxidase assembly factor heme A:farnesyltransferase COX10 [Source:HGNC Symbol;Acc:HGNC:2260]
ENSG00000047457	-1.34099	-0.85174	7.19446e-05	0.00332305	CP	protein_coding	ceruloplasmin [Source:HGNC Symbol;Acc:HGNC:2295]
ENSG00000103196	-0.549363	-0.251532	0.000337881	0.043597	CRISPLD2	protein_coding	cysteine rich secretory protein LCCL domain containing 2 [Source:HGNC Symbol;Acc:HGNC:25248]
ENSG00000121671	-0.464421	-0.27574	0.000194771	0.00956807	CRY2	protein_coding	cryptochrome circadian regulator 2 [Source:HGNC Symbol;Acc:HGNC:2385]
ENSG00000196810	-0.217911	-0.225008	0.00522381	0.00824222	CTBP1-DT	lncRNA	CTBP1 divergent transcript [Source:HGNC Symbol;Acc:HGNC:28307]
ENSG00000144579	-0.248819	-0.173535	0.00104304	0.0152895	CTDSP1	protein_coding	CTD small phosphatase 1 [Source:HGNC Symbol;Acc:HGNC:21614]
ENSG00000103811	-0.420502	-0.2073	1.62142e-05	0.00403344	CTSH	protein_coding	cathepsin H [Source:HGNC Symbol;Acc:HGNC:2535]
ENSG00000112659	-0.198799	-0.152212	0.00760166	0.0428652	CUL9	protein_coding	cullin 9 [Source:HGNC Symbol;Acc:HGNC:15982]
ENSG00000154639	-0.415973	-0.344031	0.00137333	0.0081824	CXADR	protein_coding	CXADR Ig-like cell adhesion molecule [Source:HGNC Symbol;Acc:HGNC:2559]
ENSG00000121966	-0.515354	-0.297493	0.000458907	0.0197455	CXCR4	protein_coding	C-X-C motif chemokine receptor 4 [Source:HGNC Symbol;Acc:HGNC:2561]
ENSG00000167740	-0.233414	-0.148349	0.00264711	0.0427785	CYB5D2	protein_coding	cytochrome b5 domain containing 2 [Source:HGNC Symbol;Acc:HGNC:28471]
ENSG00000100243	-0.129714	-0.135356	0.0356615	0.0440892	CYB5R3	protein_coding	cytochrome b5 reductase 3 [Source:HGNC Symbol;Acc:HGNC:2873]
ENSG00000100897	-0.124623	-0.120207	0.0164395	0.0308354	DCAF11	protein_coding	DDB1 and CUL4 associated factor 11 [Source:HGNC Symbol;Acc:HGNC:20258]
ENSG00000139990	-0.240805	-0.140736	0.00163062	0.0437356	DCAF5	protein_coding	DDB1 and CUL4 associated factor 5 [Source:HGNC Symbol;Acc:HGNC:20224]
ENSG00000177030	-0.199614	-0.274728	0.0112682	0.0040346	DEAF1	protein_coding	DEAF1 transcription factor [Source:HGNC Symbol;Acc:HGNC:14677]
ENSG00000158796	-0.127881	-0.134712	0.0115113	0.0154066	DEDD	protein_coding	death effector domain containing [Source:HGNC Symbol;Acc:HGNC:2755]
ENSG00000154309	-0.429731	-0.215906	0.000307861	0.0281316	DISP1	protein_coding	dispatched RND transporter family member 1 [Source:HGNC Symbol;Acc:HGNC:19711]
ENSG00000176399	-0.219558	-0.29934	0.0304629	0.0119348	DMRTA1	protein_coding	DMRT like family A1 [Source:HGNC Symbol;Acc:HGNC:13826]
ENSG00000136048	-0.535365	-0.31271	1.34196e-06	0.000110783	DRAM1	protein_coding	DNA damage regulated autophagy modulator 1 [Source:HGNC Symbol;Acc:HGNC:25645]
ENSG00000163840	-0.277865	-0.24557	0.00794085	0.0242332	DTX3L	protein_coding	deltex E3 ubiquitin ligase 3L [Source:HGNC Symbol;Acc:HGNC:30323]
ENSG00000105204	-0.491411	-0.27817	0.000520909	0.023449	DYRK1B	protein_coding	dual specificity tyrosine phosphorylation regulated kinase 1B [Source:HGNC Symbol;Acc:HGNC:3092]
ENSG00000127334	-0.180137	-0.195788	0.00399125	0.00501468	DYRK2	protein_coding	dual specificity tyrosine phosphorylation regulated kinase 2 [Source:HGNC Symbol;Acc:HGNC:3093]
ENSG00000198919	-0.147206	-0.121842	0.0134836	0.0484904	DZIP3	protein_coding	DAZ interacting zinc finger protein 3 [Source:HGNC Symbol;Acc:HGNC:30938]
ENSG00000117298	-0.190924	-0.233521	0.00828335	0.00545552	ECE1	protein_coding	endothelin converting enzyme 1 [Source:HGNC Symbol;Acc:HGNC:3146]
ENSG00000169242	-0.312258	-0.184725	0.000199785	0.00990563	EFNA1	protein_coding	ephrin A1 [Source:HGNC Symbol;Acc:HGNC:3221]
ENSG00000184349	-0.525297	-0.263533	0.000251607	0.0251141	EFNA5	protein_coding	ephrin A5 [Source:HGNC Symbol;Acc:HGNC:3225]
ENSG00000129521	-0.757131	-0.359721	2.04998e-06	0.000759758	EGLN3	protein_coding	egl-9 family hypoxia inducible factor 3 [Source:HGNC Symbol;Acc:HGNC:14661]
ENSG00000120738	-1.08274	-1.94436	0.00141633	0.000110921	EGR1	protein_coding	early growth response 1 [Source:HGNC Symbol;Acc:HGNC:3238]
ENSG00000186998	-0.667059	-0.464398	0.000982679	0.0147235	EMID1	protein_coding	EMI domain containing 1 [Source:HGNC Symbol;Acc:HGNC:18036]
ENSG00000171617	-0.364837	-0.23186	0.00216807	0.0376392	ENC1	protein_coding	ectodermal-neural cortex 1 [Source:HGNC Symbol;Acc:HGNC:3345]
ENSG00000187097	-0.282641	-0.164462	0.000298889	0.0145043	ENTPD5	protein_coding	ectonucleoside triphosphate diphosphohydrolase 5 (inactive) [Source:HGNC Symbol;Acc:HGNC:3367]
ENSG00000163508	-0.347425	-0.573956	0.03472	0.00536146	EOMES	protein_coding	eomesodermin [Source:HGNC Symbol;Acc:HGNC:3372]
ENSG00000129595	-0.379705	-0.251127	0.000458907	0.0103453	EPB41L4A	protein_coding	erythrocyte membrane protein band 4.1 like 4A [Source:HGNC Symbol;Acc:HGNC:13278]
ENSG00000095203	-0.285751	-0.200314	0.000218545	0.00458223	EPB41L4B	protein_coding	erythrocyte membrane protein band 4.1 like 4B [Source:HGNC Symbol;Acc:HGNC:19818]
ENSG00000044524	-1.08019	-0.290334	1.78033e-06	0.0117176	EPHA3	protein_coding	EPH receptor A3 [Source:HGNC Symbol;Acc:HGNC:3387]
ENSG00000133216	-0.503359	-0.255564	7.61696e-05	0.0106561	EPHB2	protein_coding	EPH receptor B2 [Source:HGNC Symbol;Acc:HGNC:3393]
ENSG00000120915	-0.196817	-0.23698	0.0116143	0.00814562	EPHX2	protein_coding	epoxide hydrolase 2 [Source:HGNC Symbol;Acc:HGNC:3402]
ENSG00000065361	-0.274241	-0.126096	0.00015426	0.0266409	ERBB3	protein_coding	erb-b2 receptor tyrosine kinase 3 [Source:HGNC Symbol;Acc:HGNC:3431]
ENSG00000113719	-0.190495	-0.187934	0.000942218	0.00249752	ERGIC1	protein_coding	endoplasmic reticulum-golgi intermediate compartment 1 [Source:HGNC Symbol;Acc:HGNC:29205]
ENSG00000091831	-0.37279	-0.216258	3.7537e-05	0.00319592	ESR1	protein_coding	estrogen receptor 1 [Source:HGNC Symbol;Acc:HGNC:3467]
ENSG00000196482	-0.874554	-0.426642	0.000158146	0.0208778	ESRRG	protein_coding	estrogen related receptor gamma [Source:HGNC Symbol;Acc:HGNC:3474]
ENSG00000142459	-0.496402	-0.292812	0.0014697	0.0395369	EVI5L	protein_coding	ecotropic viral integration site 5 like [Source:HGNC Symbol;Acc:HGNC:30464]
ENSG00000221990	-0.251858	-0.212319	0.00573685	0.0227965	EXOC3-AS1	lncRNA	EXOC3 antisense RNA 1 [Source:HGNC Symbol;Acc:HGNC:25175]
ENSG00000277203	-0.131833	-0.149048	0.0472497	0.0420489	F8A1	protein_coding	coagulation factor VIII associated 1 [Source:HGNC Symbol;Acc:HGNC:3547]
ENSG00000169122	-0.577639	-0.36302	6.52579e-05	0.00327275	FAM110B	protein_coding	family with sequence similarity 110 member B [Source:HGNC Symbol;Acc:HGNC:28587]
ENSG00000147724	-1.78797	-1.69187	0.00917394	0.0202749	FAM135B	protein_coding	family with sequence similarity 135 member B [Source:HGNC Symbol;Acc:HGNC:28029]
ENSG00000156050	-0.558757	-0.471327	1.92957e-05	0.000218995	FAM161B	protein_coding	FAM161 centrosomal protein B [Source:HGNC Symbol;Acc:HGNC:19854]
ENSG00000144369	-0.416872	-0.19679	0.000200585	0.0280749	FAM171B	protein_coding	family with sequence similarity 171 member B [Source:HGNC Symbol;Acc:HGNC:29412]
ENSG00000183844	-0.376293	-0.403276	0.0102205	0.012715	FAM3B	protein_coding	FAM3 metabolism regulating signaling molecule B [Source:HGNC Symbol;Acc:HGNC:1253]
ENSG00000158483	-0.426556	-0.208433	3.33047e-05	0.00713138	FAM86C1P	transcribed_unprocessed_pseudogene	family with sequence similarity 86 member C1, pseudogene [Source:HGNC Symbol;Acc:HGNC:25561]
ENSG00000251669	-0.434345	-0.234201	7.60852e-05	0.00799011	FAM86EP	transcribed_unprocessed_pseudogene	family with sequence similarity 86 member E, pseudogene [Source:HGNC Symbol;Acc:HGNC:28017]
ENSG00000164845	-0.793947	-0.340663	4.41096e-05	0.016537	FAM86FP	transcribed_unprocessed_pseudogene	family with sequence similarity 86 member F, pseudogene [Source:HGNC Symbol;Acc:HGNC:42357]
ENSG00000253540	-1.04629	-0.487631	3.30198e-06	0.00159838	FAM86HP	transcribed_unprocessed_pseudogene	family with sequence similarity 86 member H, pseudogene [Source:HGNC Symbol;Acc:HGNC:42359]
ENSG00000178974	-0.28378	-0.190109	0.00076491	0.0147482	FBXO34	protein_coding	F-box protein 34 [Source:HGNC Symbol;Acc:HGNC:20201]
ENSG00000077782	-0.288367	-0.2532	0.00181923	0.00768526	FGFR1	protein_coding	fibroblast growth factor receptor 1 [Source:HGNC Symbol;Acc:HGNC:3688]
ENSG00000122176	-0.59125	-0.697756	0.025176	0.0189311	FMOD	protein_coding	fibromodulin [Source:HGNC Symbol;Acc:HGNC:3774]
ENSG00000115414	-0.497399	-0.463451	9.32403e-05	0.000503686	FN1	protein_coding	fibronectin 1 [Source:HGNC Symbol;Acc:HGNC:3778]
ENSG00000129514	-0.258609	-0.1978	0.00102507	0.00956719	FOXA1	protein_coding	forkhead box A1 [Source:HGNC Symbol;Acc:HGNC:5021]
ENSG00000114861	-0.187598	-0.181444	0.0252401	0.0438952	FOXP1	protein_coding	forkhead box P1 [Source:HGNC Symbol;Acc:HGNC:3823]
ENSG00000137166	-0.44704	-0.247934	0.000502304	0.0251141	FOXP4	protein_coding	forkhead box P4 [Source:HGNC Symbol;Acc:HGNC:20842]
ENSG00000165879	-0.291019	-0.331544	0.00719146	0.00680125	FRAT1	protein_coding	FRAT regulator of WNT signaling pathway 1 [Source:HGNC Symbol;Acc:HGNC:3944]
ENSG00000139926	-0.453403	-0.154136	2.30275e-05	0.0294227	FRMD6	protein_coding	FERM domain containing 6 [Source:HGNC Symbol;Acc:HGNC:19839]
ENSG00000073910	-0.741749	-0.549028	0.000145809	0.00255757	FRY	protein_coding	FRY microtubule binding protein [Source:HGNC Symbol;Acc:HGNC:20367]
ENSG00000179163	-0.182508	-0.292836	0.031109	0.00545212	FUCA1	protein_coding	alpha-L-fucosidase 1 [Source:HGNC Symbol;Acc:HGNC:4006]
ENSG00000276116	-0.352998	-0.359705	0.031706	0.0437356	FUT8-AS1	lncRNA	FUT8 antisense RNA 1 [Source:HGNC Symbol;Acc:HGNC:44294]
ENSG00000163251	-0.290554	-0.287364	0.00654897	0.0125916	FZD5	protein_coding	frizzled class receptor 5 [Source:HGNC Symbol;Acc:HGNC:4043]
ENSG00000285410	-0.145222	-0.286686	0.0480145	0.00311833	GABPB1-IT1	lncRNA	GABPB1 intronic transcript [Source:HGNC Symbol;Acc:HGNC:25469]
ENSG00000116717	-0.360145	-0.430389	0.0055694	0.00422631	GADD45A	protein_coding	growth arrest and DNA damage inducible alpha [Source:HGNC Symbol;Acc:HGNC:4095]
ENSG00000109586	-0.267621	-0.200891	0.00130549	0.0127127	GALNT7	protein_coding	polypeptide N-acetylgalactosaminyltransferase 7 [Source:HGNC Symbol;Acc:HGNC:4129]
ENSG00000179348	-0.426895	-0.194097	5.50516e-05	0.0145671	GATA2	protein_coding	GATA binding protein 2 [Source:HGNC Symbol;Acc:HGNC:4171]
ENSG00000107485	-0.406995	-0.313573	3.30198e-06	7.69899e-05	GATA3	protein_coding	GATA binding protein 3 [Source:HGNC Symbol;Acc:HGNC:4172]
ENSG00000197308	-0.67497	-0.209805	1.64448e-05	0.0351669	GATA3-AS1	lncRNA	GATA3 antisense RNA 1 [Source:HGNC Symbol;Acc:HGNC:33786]
ENSG00000111846	-0.960809	-0.48264	3.92915e-06	0.00120711	GCNT2	protein_coding	glucosaminyl (N-acetyl) transferase 2 (I blood group) [Source:HGNC Symbol;Acc:HGNC:4204]
ENSG00000168621	-1.37946	-0.788731	1.01194e-05	0.00132503	GDNF	protein_coding	glial cell derived neurotrophic factor [Source:HGNC Symbol;Acc:HGNC:4232]
ENSG00000153982	-0.932437	-0.715099	0.000156907	0.00225354	GDPD1	protein_coding	glycerophosphodiester phosphodiesterase domain containing 1 [Source:HGNC Symbol;Acc:HGNC:20883]
ENSG00000112964	-0.250882	-0.604769	0.0188574	0.000310579	GHR	protein_coding	growth hormone receptor [Source:HGNC Symbol;Acc:HGNC:4263]
ENSG00000186417	-0.610039	-0.467407	0.00516835	0.032125	GLDN	protein_coding	gliomedin [Source:HGNC Symbol;Acc:HGNC:29514]
ENSG00000016864	-0.183931	-0.12037	0.00251954	0.0368223	GLT8D1	protein_coding	glycosyltransferase 8 domain containing 1 [Source:HGNC Symbol;Acc:HGNC:24870]
ENSG00000156052	-0.113891	-0.145556	0.034213	0.018076	GNAQ	protein_coding	G protein subunit alpha q [Source:HGNC Symbol;Acc:HGNC:4390]
ENSG00000090581	-0.103676	-0.190027	0.0451526	0.00432506	GNPTG	protein_coding	N-acetylglucosamine-1-phosphate transferase subunit gamma [Source:HGNC Symbol;Acc:HGNC:23026]
ENSG00000179399	-0.823526	-0.452995	0.000190766	0.0137949	GPC5	protein_coding	glypican 5 [Source:HGNC Symbol;Acc:HGNC:4453]
ENSG00000170775	-0.341362	-0.359313	0.0028736	0.00444302	GPR37	protein_coding	G protein-coupled receptor 37 [Source:HGNC Symbol;Acc:HGNC:4494]
ENSG00000170412	-0.494593	-0.203056	3.8748e-05	0.01809	GPRC5C	protein_coding	G protein-coupled receptor class C group 5 member C [Source:HGNC Symbol;Acc:HGNC:13309]
ENSG00000187837	-0.436985	-0.42903	0.000382187	0.00121908	H1-2	protein_coding	H1.2 linker histone, cluster member [Source:HGNC Symbol;Acc:HGNC:4716]
ENSG00000124575	-1.09503	-0.746749	2.76029e-05	0.00111328	H1-3	protein_coding	H1.3 linker histone, cluster member [Source:HGNC Symbol;Acc:HGNC:4717]
ENSG00000196787	-0.643026	-0.322053	3.10915e-05	0.0061411	H2AC11	protein_coding	H2A clustered histone 11 [Source:HGNC Symbol;Acc:HGNC:4737]
ENSG00000196747	-0.824053	-0.67091	1.29561e-05	0.000199184	H2AC13	protein_coding	H2A clustered histone 13 [Source:HGNC Symbol;Acc:HGNC:4725]
ENSG00000184270	-1.47727	-1.97509	0.0130299	0.00542151	H2AC21	protein_coding	H2A clustered histone 21 [Source:HGNC Symbol;Acc:HGNC:20508]
ENSG00000277075	-0.613853	-0.368825	0.00238215	0.0490879	H2AC8	protein_coding	H2A clustered histone 8 [Source:HGNC Symbol;Acc:HGNC:4724]
ENSG00000197903	-0.116872	-0.170274	0.0196297	0.00534672	H2BC12	protein_coding	H2B clustered histone 12 [Source:HGNC Symbol;Acc:HGNC:13954]
ENSG00000185130	-0.91237	-0.782924	0.000309692	0.0021579	H2BC13	protein_coding	H2B clustered histone 13 [Source:HGNC Symbol;Acc:HGNC:4748]
ENSG00000233822	-0.526481	-0.541818	0.000689368	0.00156501	H2BC15	protein_coding	H2B clustered histone 15 [Source:HGNC Symbol;Acc:HGNC:4749]
ENSG00000203814	-0.816315	-0.837828	9.6303e-05	0.000277656	H2BC18	protein_coding	H2B clustered histone 18 [Source:HGNC Symbol;Acc:HGNC:24700]
ENSG00000220323	-0.931113	-0.547207	4.40563e-06	0.000546282	H2BC19P	transcribed_unprocessed_pseudogene	H2B clustered histone 19, pseudogene [Source:HGNC Symbol;Acc:HGNC:20517]
ENSG00000261716	-0.73933	-0.414324	2.4283e-06	0.000347947	H2BC20P	transcribed_unprocessed_pseudogene	H2B clustered histone 20, pseudogene [Source:HGNC Symbol;Acc:HGNC:20516]
ENSG00000184678	-0.503536	-0.606837	3.94368e-06	4.82857e-06	H2BC21	protein_coding	H2B clustered histone 21 [Source:HGNC Symbol;Acc:HGNC:4760]
ENSG00000180596	-0.518637	-0.589353	0.000496407	0.00068114	H2BC4	protein_coding	H2B clustered histone 4 [Source:HGNC Symbol;Acc:HGNC:4757]
ENSG00000158373	-0.26995	-0.287043	0.000838717	0.00156501	H2BC5	protein_coding	H2B clustered histone 5 [Source:HGNC Symbol;Acc:HGNC:4747]
ENSG00000274290	-0.981232	-0.828557	0.000189637	0.0015993	H2BC6	protein_coding	H2B clustered histone 6 [Source:HGNC Symbol;Acc:HGNC:4753]
ENSG00000277224	-1.24167	-0.977923	4.39301e-06	8.88506e-05	H2BC7	protein_coding	H2B clustered histone 7 [Source:HGNC Symbol;Acc:HGNC:4752]
ENSG00000273802	-1.06148	-0.885127	2.04179e-06	2.53388e-05	H2BC8	protein_coding	H2B clustered histone 8 [Source:HGNC Symbol;Acc:HGNC:4746]
ENSG00000275713	-0.678254	-0.387468	6.52916e-05	0.00541224	H2BC9	protein_coding	H2B clustered histone 9 [Source:HGNC Symbol;Acc:HGNC:4755]
ENSG00000196890	-1.18742	-0.491037	0.000103804	0.033134	H2BU1	protein_coding	H2B.U histone 1 [Source:HGNC Symbol;Acc:HGNC:20514]
ENSG00000278828	-0.815482	-0.603924	1.70457e-06	3.60728e-05	H3C10	protein_coding	H3 clustered histone 10 [Source:HGNC Symbol;Acc:HGNC:4775]
ENSG00000197153	-0.897314	-0.919507	0.000512096	0.00124585	H3C12	protein_coding	H3 clustered histone 12 [Source:HGNC Symbol;Acc:HGNC:4774]
ENSG00000183598	-0.870764	-1.37449	0.0256011	0.00473573	H3C13	protein_coding	H3 clustered histone 13 [Source:HGNC Symbol;Acc:HGNC:25311]
ENSG00000286522	-1.30458	-0.656506	2.17451e-05	0.00437739	H3C2	protein_coding	H3 clustered histone 2 [Source:HGNC Symbol;Acc:HGNC:4776]
ENSG00000274750	-0.414613	-0.409816	0.00244662	0.0053916	H3C6	protein_coding	H3 clustered histone 6 [Source:HGNC Symbol;Acc:HGNC:4769]
ENSG00000277775	-1.14316	-0.654003	0.00055723	0.0234357	H3C7	protein_coding	H3 clustered histone 7 [Source:HGNC Symbol;Acc:HGNC:4773]
ENSG00000273983	-0.606851	-0.35223	4.83306e-05	0.00403344	H3C8	protein_coding	H3 clustered histone 8 [Source:HGNC Symbol;Acc:HGNC:4772]
ENSG00000197837	-0.922343	-1.08649	1.30509e-05	2.53388e-05	H4-16	protein_coding	H4 histone 16 [Source:HGNC Symbol;Acc:HGNC:20510]
ENSG00000276966	-0.940721	-0.598744	2.50256e-05	0.00144961	H4C5	protein_coding	H4 clustered histone 5 [Source:HGNC Symbol;Acc:HGNC:4790]
ENSG00000158406	-0.628707	-0.580953	7.52639e-06	5.80084e-05	H4C8	protein_coding	H4 clustered histone 8 [Source:HGNC Symbol;Acc:HGNC:4788]
ENSG00000276180	-0.845875	-0.544788	2.6502e-05	0.00142415	H4C9	protein_coding	H4 clustered histone 9 [Source:HGNC Symbol;Acc:HGNC:4793]
ENSG00000231133	-1.5779	-1.15824	0.00168566	0.0170605	HAR1B	lncRNA	highly accelerated region 1B [Source:HGNC Symbol;Acc:HGNC:33118]
ENSG00000196917	-0.65595	-0.26122	4.9764e-06	0.00495646	HCAR1	protein_coding	hydroxycarboxylic acid receptor 1 [Source:HGNC Symbol;Acc:HGNC:4532]
ENSG00000255398	-0.85018	-0.488136	0.00121278	0.0391262	HCAR3	protein_coding	hydroxycarboxylic acid receptor 3 [Source:HGNC Symbol;Acc:HGNC:16824]
ENSG00000114315	-0.796255	-0.588335	1.59942e-06	3.40824e-05	HES1	protein_coding	hes family bHLH transcription factor 1 [Source:HGNC Symbol;Acc:HGNC:5192]
ENSG00000186834	-0.375615	-0.16383	7.15258e-05	0.0205988	HEXIM1	protein_coding	HEXIM P-TEFb complex subunit 1 [Source:HGNC Symbol;Acc:HGNC:24953]
ENSG00000067829	-0.212043	-0.127118	0.00137949	0.035518	IDH3G	protein_coding	isocitrate dehydrogenase (NAD(+)) 3 non-catalytic subunit gamma [Source:HGNC Symbol;Acc:HGNC:5386]
ENSG00000174498	-0.68878	-0.310813	4.26481e-05	0.0127127	IGDCC3	protein_coding	immunoglobulin superfamily DCC subclass member 3 [Source:HGNC Symbol;Acc:HGNC:9700]
ENSG00000073792	-0.295222	-0.17034	0.000385092	0.0177434	IGF2BP2	protein_coding	insulin like growth factor 2 mRNA binding protein 2 [Source:HGNC Symbol;Acc:HGNC:28867]
ENSG00000163702	-0.262618	-0.203558	0.0082847	0.043597	IL17RC	protein_coding	interleukin 17 receptor C [Source:HGNC Symbol;Acc:HGNC:18358]
ENSG00000132376	-0.175227	-0.185803	0.00500903	0.00699773	INPP5K	protein_coding	inositol polyphosphate-5-phosphatase K [Source:HGNC Symbol;Acc:HGNC:33882]
ENSG00000145703	-0.622315	-0.525623	0.00137499	0.00738294	IQGAP2	protein_coding	IQ motif containing GTPase activating protein 2 [Source:HGNC Symbol;Acc:HGNC:6111]
ENSG00000144711	-0.3049	-0.213975	0.00237014	0.0261288	IQSEC1	protein_coding	IQ motif and Sec7 domain ArfGEF 1 [Source:HGNC Symbol;Acc:HGNC:29112]
ENSG00000119669	-0.47023	-0.343537	0.00330452	0.0281035	IRF2BPL	protein_coding	interferon regulatory factor 2 binding protein like [Source:HGNC Symbol;Acc:HGNC:14282]
ENSG00000129636	-0.126421	-0.118759	0.0231614	0.0452042	ITFG1	protein_coding	integrin alpha FG-GAP repeat containing 1 [Source:HGNC Symbol;Acc:HGNC:30697]
ENSG00000005884	-0.259859	-0.270716	0.00585134	0.00873731	ITGA3	protein_coding	integrin subunit alpha 3 [Source:HGNC Symbol;Acc:HGNC:6139]
ENSG00000151655	-0.872805	-1.04838	0.0456129	0.0319674	ITIH2	protein_coding	inter-alpha-trypsin inhibitor heavy chain 2 [Source:HGNC Symbol;Acc:HGNC:6167]
ENSG00000102313	-0.578636	-0.514835	0.00795116	0.023564	ITIH6	protein_coding	inter-alpha-trypsin inhibitor heavy chain family member 6 [Source:HGNC Symbol;Acc:HGNC:28907]
ENSG00000173801	-0.199948	-0.207778	0.00477347	0.00737273	JUP	protein_coding	junction plakoglobin [Source:HGNC Symbol;Acc:HGNC:6207]
ENSG00000114166	-0.216144	-0.340388	0.0161161	0.00286633	KAT2B	protein_coding	lysine acetyltransferase 2B [Source:HGNC Symbol;Acc:HGNC:8638]
ENSG00000162989	-0.286496	-0.421443	0.000315223	8.98517e-05	KCNJ3	protein_coding	potassium inwardly rectifying channel subfamily J member 3 [Source:HGNC Symbol;Acc:HGNC:6264]
ENSG00000066135	-0.297088	-0.125931	0.000226835	0.0467642	KDM4A	protein_coding	lysine demethylase 4A [Source:HGNC Symbol;Acc:HGNC:22978]
ENSG00000117139	-0.194418	-0.253931	0.000421099	0.000237552	KDM5B	protein_coding	lysine demethylase 5B [Source:HGNC Symbol;Acc:HGNC:18039]
ENSG00000128052	-1.21121	-0.747704	0.000652662	0.0188583	KDR	protein_coding	kinase insert domain receptor [Source:HGNC Symbol;Acc:HGNC:6307]
ENSG00000142687	-0.241619	-0.193963	0.000821521	0.00640611	KIAA0319L	protein_coding	KIAA0319 like [Source:HGNC Symbol;Acc:HGNC:30071]
ENSG00000162522	-0.219524	-0.173295	0.00380607	0.0219404	KIAA1522	protein_coding	KIAA1522 [Source:HGNC Symbol;Acc:HGNC:29301]
ENSG00000197892	-0.192811	-0.285352	0.0147633	0.00364026	KIF13B	protein_coding	kinesin family member 13B [Source:HGNC Symbol;Acc:HGNC:14405]
ENSG00000101350	-0.185134	-0.150074	0.00518891	0.0251505	KIF3B	protein_coding	kinesin family member 3B [Source:HGNC Symbol;Acc:HGNC:6320]
ENSG00000137171	-0.23144	-0.215277	0.00749347	0.018534	KLC4	protein_coding	kinesin light chain 4 [Source:HGNC Symbol;Acc:HGNC:21624]
ENSG00000067082	-0.345519	-0.45983	0.00471769	0.00211411	KLF6	protein_coding	Kruppel like factor 6 [Source:HGNC Symbol;Acc:HGNC:2235]
ENSG00000119138	-0.461982	-0.235121	4.13949e-05	0.00678339	KLF9	protein_coding	Kruppel like factor 9 [Source:HGNC Symbol;Acc:HGNC:1123]
ENSG00000172037	-0.286283	-0.170379	0.00112632	0.0321971	LAMB2	protein_coding	laminin subunit beta 2 [Source:HGNC Symbol;Acc:HGNC:6487]
ENSG00000135862	-0.210449	-0.202935	0.00794085	0.0165879	LAMC1	protein_coding	laminin subunit gamma 1 [Source:HGNC Symbol;Acc:HGNC:6492]
ENSG00000182195	-0.212278	-0.236267	0.0046423	0.0051596	LDOC1	protein_coding	LDOC1 regulator of NFKB signaling [Source:HGNC Symbol;Acc:HGNC:6548]
ENSG00000116977	-0.52379	-0.219353	6.16684e-06	0.00437739	LGALS8	protein_coding	galectin 8 [Source:HGNC Symbol;Acc:HGNC:6569]
ENSG00000273706	-0.620841	-0.350443	0.00102264	0.0375902	LHX1	protein_coding	LIM homeobox 1 [Source:HGNC Symbol;Acc:HGNC:6593]
ENSG00000244968	-0.393923	-0.424357	0.00261391	0.00364026	LIFR-AS1	lncRNA	LIFR antisense RNA 1 [Source:HGNC Symbol;Acc:HGNC:43600]
ENSG00000050405	-0.320947	-0.161775	0.000390646	0.032276	LIMA1	protein_coding	LIM domain and actin binding 1 [Source:HGNC Symbol;Acc:HGNC:24636]
ENSG00000064042	-0.439145	-0.529726	0.00397421	0.00286633	LIMCH1	protein_coding	LIM and calponin homology domains 1 [Source:HGNC Symbol;Acc:HGNC:29191]
ENSG00000111052	-0.376731	-0.270253	0.000178549	0.00348836	LIN7A	protein_coding	lin-7 homolog A, crumbs cell polarity complex component [Source:HGNC Symbol;Acc:HGNC:17787]
ENSG00000277142	-0.250646	-0.361338	0.0454596	0.014208	LINC00235	lncRNA	long intergenic non-protein coding RNA 235 [Source:HGNC Symbol;Acc:HGNC:14138]
ENSG00000237864	-0.967031	-0.784209	0.0101065	0.0420726	LINC00322	lncRNA	long intergenic non-protein coding RNA 322 [Source:HGNC Symbol;Acc:HGNC:33698]
ENSG00000203930	-0.296323	-0.501976	0.0146546	0.00182224	LINC00632	lncRNA	long intergenic non-protein coding RNA 632 [Source:HGNC Symbol;Acc:HGNC:27865]
ENSG00000258441	-0.939955	-0.94694	8.51045e-05	0.000277656	LINC00641	lncRNA	long intergenic non-protein coding RNA 641 [Source:HGNC Symbol;Acc:HGNC:27511]
ENSG00000232645	-0.917766	-0.587026	0.00141645	0.0273818	LINC01431	lncRNA	long intergenic non-protein coding RNA 1431 [Source:HGNC Symbol;Acc:HGNC:50744]
ENSG00000221949	-0.541562	-0.535769	0.0129405	0.0223923	LINC01465	lncRNA	long intergenic non-protein coding RNA 1465 [Source:HGNC Symbol;Acc:HGNC:26364]
ENSG00000249846	-1.02253	-0.243826	2.04998e-06	0.0257	LINC02021	lncRNA	long intergenic non-protein coding RNA 2021 [Source:HGNC Symbol;Acc:HGNC:52856]
ENSG00000169783	-0.448339	-0.548128	0.000202704	0.000193433	LINGO1	protein_coding	leucine rich repeat and Ig domain containing 1 [Source:HGNC Symbol;Acc:HGNC:21205]
ENSG00000175536	-0.261218	-0.209348	0.00541052	0.0273201	LIPT2	protein_coding	lipoyl(octanoyl) transferase 2 [Source:HGNC Symbol;Acc:HGNC:37216]
ENSG00000189067	-0.247789	-0.164147	0.000100072	0.00342282	LITAF	protein_coding	lipopolysaccharide induced TNF factor [Source:HGNC Symbol;Acc:HGNC:16841]
ENSG00000103227	-0.290385	-0.24962	0.00578019	0.0210602	LMF1	protein_coding	lipase maturation factor 1 [Source:HGNC Symbol;Acc:HGNC:14154]
ENSG00000143013	-0.580979	-0.288285	2.07157e-05	0.00455417	LMO4	protein_coding	LIM domain only 4 [Source:HGNC Symbol;Acc:HGNC:6644]
ENSG00000111684	-0.333622	-0.173141	7.2136e-05	0.00921333	LPCAT3	protein_coding	lysophosphatidylcholine acyltransferase 3 [Source:HGNC Symbol;Acc:HGNC:30244]
ENSG00000168672	-0.351872	-0.266516	1.11731e-05	0.000271937	LRATD2	protein_coding	LRAT domain containing 2 [Source:HGNC Symbol;Acc:HGNC:24166]
ENSG00000198589	-0.179123	-0.275606	0.0124751	0.00250529	LRBA	protein_coding	LPS responsive beige-like anchor protein [Source:HGNC Symbol;Acc:HGNC:1742]
ENSG00000197324	-0.10906	-0.221392	0.0495784	0.0028622	LRP10	protein_coding	LDL receptor related protein 10 [Source:HGNC Symbol;Acc:HGNC:14553]
ENSG00000081479	-1.24461	-1.53218	0.000157426	0.000147998	LRP2	protein_coding	LDL receptor related protein 2 [Source:HGNC Symbol;Acc:HGNC:6694]
ENSG00000124831	-0.178361	-0.118908	0.000702444	0.0140745	LRRFIP1	protein_coding	LRR binding FLII interacting protein 1 [Source:HGNC Symbol;Acc:HGNC:6702]
ENSG00000151276	-0.318636	-0.666176	0.000629735	2.53388e-05	MAGI1	protein_coding	membrane associated guanylate kinase, WW and PDZ domain containing 1 [Source:HGNC Symbol;Acc:HGNC:946]
ENSG00000081026	-0.172943	-0.233557	0.0248475	0.00982467	MAGI3	protein_coding	membrane associated guanylate kinase, WW and PDZ domain containing 3 [Source:HGNC Symbol;Acc:HGNC:29647]
ENSG00000196782	-0.293463	-0.374082	0.00470454	0.00258583	MAML3	protein_coding	mastermind like transcriptional coactivator 3 [Source:HGNC Symbol;Acc:HGNC:16272]
ENSG00000212916	-0.259803	-0.371823	0.048339	0.0157474	MAP10	protein_coding	microtubule associated protein 10 [Source:HGNC Symbol;Acc:HGNC:29265]
ENSG00000132561	-0.63604	-0.240765	7.61696e-05	0.0394952	MATN2	protein_coding	matrilin 2 [Source:HGNC Symbol;Acc:HGNC:6908]
ENSG00000229619	-0.306021	-0.568412	0.0170598	0.00133258	MBNL1-AS1	lncRNA	MBNL1 antisense RNA 1 [Source:HGNC Symbol;Acc:HGNC:44584]
ENSG00000068305	-0.269911	-0.112587	0.000147709	0.0391247	MEF2A	protein_coding	myocyte enhancer factor 2A [Source:HGNC Symbol;Acc:HGNC:6993]
ENSG00000171806	-0.600036	-0.148644	3.07377e-06	0.0298267	METTL18	protein_coding	methyltransferase like 18 [Source:HGNC Symbol;Acc:HGNC:28793]
ENSG00000198948	-0.340082	-0.300222	0.000388413	0.00219797	MFAP3L	protein_coding	microfibril associated protein 3 like [Source:HGNC Symbol;Acc:HGNC:29083]
ENSG00000074416	-0.335249	-0.42856	0.00300378	0.00175297	MGLL	protein_coding	monoglyceride lipase [Source:HGNC Symbol;Acc:HGNC:17038]
ENSG00000154305	-0.142243	-0.210861	0.012792	0.00307205	MIA3	protein_coding	MIA SH3 domain ER export factor 3 [Source:HGNC Symbol;Acc:HGNC:24008]
ENSG00000165175	-0.174544	-0.181627	0.0264334	0.0343599	MID1IP1	protein_coding	MID1 interacting protein 1 [Source:HGNC Symbol;Acc:HGNC:20715]
ENSG00000080561	-0.238635	-0.21956	0.000737508	0.0028958	MID2	protein_coding	midline 2 [Source:HGNC Symbol;Acc:HGNC:7096]
ENSG00000125457	-0.122036	-0.192	0.0450571	0.00912667	MIF4GD	protein_coding	MIF4G domain containing [Source:HGNC Symbol;Acc:HGNC:24030]
ENSG00000213190	-0.431635	-0.583739	0.0445365	0.0184429	MLLT11	protein_coding	MLLT11 transcription factor 7 cofactor [Source:HGNC Symbol;Acc:HGNC:16997]
ENSG00000008516	-0.678236	-0.411904	0.000164474	0.00770461	MMP25	protein_coding	matrix metallopeptidase 25 [Source:HGNC Symbol;Acc:HGNC:14246]
ENSG00000173269	-0.804237	-0.72983	4.09953e-05	0.000276882	MMRN2	protein_coding	multimerin 2 [Source:HGNC Symbol;Acc:HGNC:19888]
ENSG00000155363	-0.271458	-0.214143	0.00454979	0.0253947	MOV10	protein_coding	Mov10 RISC complex RNA helicase [Source:HGNC Symbol;Acc:HGNC:7200]
ENSG00000188895	-0.155208	-0.104711	0.00179987	0.0258083	MSL1	protein_coding	MSL complex subunit 1 [Source:HGNC Symbol;Acc:HGNC:27905]
ENSG00000117640	-0.303955	-0.185662	0.00105196	0.0273818	MTFR1L	protein_coding	mitochondrial fission regulator 1 like [Source:HGNC Symbol;Acc:HGNC:28836]
ENSG00000177000	-0.392351	-0.259466	0.0023327	0.0335606	MTHFR	protein_coding	methylenetetrahydrofolate reductase [Source:HGNC Symbol;Acc:HGNC:7436]
ENSG00000171100	-0.188118	-0.154681	0.0133592	0.0491342	MTM1	protein_coding	myotubularin 1 [Source:HGNC Symbol;Acc:HGNC:7448]
ENSG00000157601	-0.412856	-0.346199	0.00912976	0.0341024	MX1	protein_coding	MX dynamin like GTPase 1 [Source:HGNC Symbol;Acc:HGNC:7532]
ENSG00000123933	-0.40455	-0.210309	0.000512096	0.033787	MXD4	protein_coding	MAX dimerization protein 4 [Source:HGNC Symbol;Acc:HGNC:13906]
ENSG00000136997	-0.256912	-0.638578	0.00665917	7.69899e-05	MYC	protein_coding	MYC proto-oncogene, bHLH transcription factor [Source:HGNC Symbol;Acc:HGNC:7553]
ENSG00000196535	-0.372293	-0.315395	0.0133592	0.0440346	MYO18A	protein_coding	myosin XVIIIA [Source:HGNC Symbol;Acc:HGNC:31104]
ENSG00000176658	-0.256858	-0.237525	0.00164588	0.00545552	MYO1D	protein_coding	myosin ID [Source:HGNC Symbol;Acc:HGNC:7598]
ENSG00000108784	-0.164861	-0.210347	0.0262979	0.0139915	NAGLU	protein_coding	N-acetyl-alpha-glucosaminidase [Source:HGNC Symbol;Acc:HGNC:7632]
ENSG00000213995	-0.235217	-0.139663	0.000633317	0.021769	NAXD	protein_coding	NAD(P)HX dehydratase [Source:HGNC Symbol;Acc:HGNC:25576]
ENSG00000172915	-0.629979	-0.485005	8.26994e-06	0.000179433	NBEA	protein_coding	neurobeachin [Source:HGNC Symbol;Acc:HGNC:7648]
ENSG00000188554	-0.223429	-0.20228	0.000201376	0.00115342	NBR1	protein_coding	NBR1 autophagy cargo receptor [Source:HGNC Symbol;Acc:HGNC:6746]
ENSG00000154654	-0.26315	-0.350008	8.51045e-05	5.80084e-05	NCAM2	protein_coding	neural cell adhesion molecule 2 [Source:HGNC Symbol;Acc:HGNC:7657]
ENSG00000140396	-0.141523	-0.098441	0.00326006	0.0342838	NCOA2	protein_coding	nuclear receptor coactivator 2 [Source:HGNC Symbol;Acc:HGNC:7669]
ENSG00000162736	-0.180158	-0.184172	0.000836196	0.00191642	NCSTN	protein_coding	nicastrin [Source:HGNC Symbol;Acc:HGNC:17091]
ENSG00000130202	-0.242369	-0.227318	0.00410972	0.010525	NECTIN2	protein_coding	nectin cell adhesion molecule 2 [Source:HGNC Symbol;Acc:HGNC:9707]
ENSG00000204386	-0.323884	-0.207994	0.000157426	0.00565922	NEU1	protein_coding	neuraminidase 1 [Source:HGNC Symbol;Acc:HGNC:7758]
ENSG00000050030	-0.598591	-1.13281	0.0427867	0.00338258	NEXMIF	protein_coding	neurite extension and migration factor [Source:HGNC Symbol;Acc:HGNC:29433]
ENSG00000163531	-1.04519	-0.813974	0.00329686	0.0211019	NFASC	protein_coding	neurofascin [Source:HGNC Symbol;Acc:HGNC:29866]
ENSG00000144802	-0.406014	-0.473968	0.00227628	0.00218337	NFKBIZ	protein_coding	NFKB inhibitor zeta [Source:HGNC Symbol;Acc:HGNC:29805]
ENSG00000187566	-0.226421	-0.225706	0.0244146	0.038022	NHLRC1	protein_coding	NHL repeat containing E3 ubiquitin protein ligase 1 [Source:HGNC Symbol;Acc:HGNC:21576]
ENSG00000204131	-0.479957	-0.597141	0.0403984	0.0239371	NHSL2	protein_coding	NHS like 2 [Source:HGNC Symbol;Acc:HGNC:33737]
ENSG00000177406	-0.279669	-0.26462	0.0169318	0.034302	NINJ2-AS1	lncRNA	NINJ2 antisense RNA 1 [Source:HGNC Symbol;Acc:HGNC:40405]
ENSG00000112992	-0.0940859	-0.193986	0.0428967	0.00221555	NNT	protein_coding	nicotinamide nucleotide transhydrogenase [Source:HGNC Symbol;Acc:HGNC:7863]
ENSG00000074590	-0.366102	-0.225579	0.000338311	0.0120722	NUAK1	protein_coding	NUAK family kinase 1 [Source:HGNC Symbol;Acc:HGNC:14311]
ENSG00000272325	-0.148644	-0.300026	0.0397698	0.0022408	NUDT3	protein_coding	nudix hydrolase 3 [Source:HGNC Symbol;Acc:HGNC:8050]
ENSG00000173598	-0.304947	-0.247594	7.28413e-05	0.000955568	NUDT4	protein_coding	nudix hydrolase 4 [Source:HGNC Symbol;Acc:HGNC:8051]
ENSG00000136243	-0.308309	-0.292776	0.00269462	0.00707838	NUP42	protein_coding	nucleoporin 42 [Source:HGNC Symbol;Acc:HGNC:17010]
ENSG00000122584	-3.03012	-1.42633	0.000412158	0.0435741	NXPH1	protein_coding	neurexophilin 1 [Source:HGNC Symbol;Acc:HGNC:20693]
ENSG00000264522	-0.179218	-0.20381	0.03893	0.0340722	OTUD7B	protein_coding	OTU deubiquitinase 7B [Source:HGNC Symbol;Acc:HGNC:16683]
ENSG00000117385	-0.21386	-0.168018	0.00795116	0.0400557	P3H1	protein_coding	prolyl 3-hydroxylase 1 [Source:HGNC Symbol;Acc:HGNC:19316]
ENSG00000100266	-0.152525	-0.147638	0.0233525	0.0409735	PACSIN2	protein_coding	protein kinase C and casein kinase substrate in neurons 2 [Source:HGNC Symbol;Acc:HGNC:8571]
ENSG00000204304	-0.160602	-0.153205	0.0190364	0.0366518	PBX2	protein_coding	PBX homeobox 2 [Source:HGNC Symbol;Acc:HGNC:8633]
ENSG00000173599	-0.258044	-0.191836	0.00452202	0.0328488	PC	protein_coding	pyruvate carboxylase [Source:HGNC Symbol;Acc:HGNC:8636]
ENSG00000156453	-0.507171	-0.340076	2.49115e-05	0.00111328	PCDH1	protein_coding	protocadherin 1 [Source:HGNC Symbol;Acc:HGNC:8655]
ENSG00000277258	-0.328886	-0.18978	0.000307861	0.0154066	PCGF2	protein_coding	polycomb group ring finger 2 [Source:HGNC Symbol;Acc:HGNC:12929]
ENSG00000185619	-0.200688	-0.124789	0.00181899	0.0368223	PCGF3	protein_coding	polycomb group ring finger 3 [Source:HGNC Symbol;Acc:HGNC:10066]
ENSG00000140479	-0.199888	-0.255921	0.0169058	0.00872252	PCSK6	protein_coding	proprotein convertase subtilisin/kexin type 6 [Source:HGNC Symbol;Acc:HGNC:8569]
ENSG00000004799	-0.740017	-0.532849	1.66289e-05	0.000534565	PDK4	protein_coding	pyruvate dehydrogenase kinase 4 [Source:HGNC Symbol;Acc:HGNC:8812]
ENSG00000049246	-0.446101	-0.217074	0.00020812	0.0251718	PER3	protein_coding	period circadian regulator 3 [Source:HGNC Symbol;Acc:HGNC:8847]
ENSG00000124587	-0.419487	-0.205093	0.000251231	0.0280749	PEX6	protein_coding	peroxisomal biogenesis factor 6 [Source:HGNC Symbol;Acc:HGNC:8859]
ENSG00000172943	-0.458593	-0.165111	3.8195e-05	0.0317833	PHF8	protein_coding	PHD finger protein 8 [Source:HGNC Symbol;Acc:HGNC:20672]
ENSG00000165282	-0.12171	-0.129686	0.0443234	0.0492054	PIGO	protein_coding	phosphatidylinositol glycan anchor biosynthesis class O [Source:HGNC Symbol;Acc:HGNC:23215]
ENSG00000133056	-0.222315	-0.198615	0.00433586	0.0140745	PIK3C2B	protein_coding	phosphatidylinositol-4-phosphate 3-kinase catalytic subunit type 2 beta [Source:HGNC Symbol;Acc:HGNC:8972]
ENSG00000137193	-0.202671	-0.296268	0.0241748	0.00649407	PIM1	protein_coding	Pim-1 proto-oncogene, serine/threonine kinase [Source:HGNC Symbol;Acc:HGNC:8986]
ENSG00000276293	-0.148598	-0.138681	0.0107971	0.0247298	PIP4K2B	protein_coding	phosphatidylinositol-5-phosphate 4-kinase type 2 beta [Source:HGNC Symbol;Acc:HGNC:8998]
ENSG00000198961	-0.209205	-0.172242	0.0052528	0.0237012	PJA2	protein_coding	praja ring finger ubiquitin ligase 2 [Source:HGNC Symbol;Acc:HGNC:17481]
ENSG00000057294	-0.280545	-0.251718	0.00130099	0.00526655	PKP2	protein_coding	plakophilin 2 [Source:HGNC Symbol;Acc:HGNC:9024]
ENSG00000153246	-0.486772	-0.411171	0.00146174	0.0077794	PLA2R1	protein_coding	phospholipase A2 receptor 1 [Source:HGNC Symbol;Acc:HGNC:9042]
ENSG00000121316	-0.443497	-0.381574	1.42912e-05	0.000157421	PLBD1	protein_coding	phospholipase B domain containing 1 [Source:HGNC Symbol;Acc:HGNC:26215]
ENSG00000256751	-0.532742	-0.2786	1.43106e-05	0.00274275	PLBD1-AS1	lncRNA	PLBD1 antisense RNA 1 [Source:HGNC Symbol;Acc:HGNC:51143]
ENSG00000143850	-0.166368	-0.159916	0.00626542	0.0137915	PLEKHA6	protein_coding	pleckstrin homology domain containing A6 [Source:HGNC Symbol;Acc:HGNC:17053]
ENSG00000175895	-0.528473	-0.213276	0.000150605	0.0446522	PLEKHF2	protein_coding	pleckstrin homology and FYVE domain containing 2 [Source:HGNC Symbol;Acc:HGNC:20757]
ENSG00000145632	-0.385184	-0.606191	8.22863e-06	3.52786e-06	PLK2	protein_coding	polo like kinase 2 [Source:HGNC Symbol;Acc:HGNC:19699]
ENSG00000130653	-0.279698	-0.424159	0.0279258	0.00636767	PNPLA7	protein_coding	patatin like phospholipase domain containing 7 [Source:HGNC Symbol;Acc:HGNC:24768]
ENSG00000130714	-0.205665	-0.115204	0.000901939	0.0357343	POMT1	protein_coding	protein O-mannosyltransferase 1 [Source:HGNC Symbol;Acc:HGNC:9202]
ENSG00000127125	-0.0926736	-0.150556	0.0489416	0.00872252	PPCS	protein_coding	phosphopantothenoylcysteine synthetase [Source:HGNC Symbol;Acc:HGNC:25686]
ENSG00000166387	-0.362329	-0.370585	0.00510675	0.00849373	PPFIBP2	protein_coding	PPFIA binding protein 2 [Source:HGNC Symbol;Acc:HGNC:9250]
ENSG00000066027	-0.165086	-0.183981	0.0239914	0.0230758	PPP2R5A	protein_coding	protein phosphatase 2 regulatory subunit B'alpha [Source:HGNC Symbol;Acc:HGNC:9309]
ENSG00000108946	-0.169948	-0.212849	0.00683566	0.0040346	PRKAR1A	protein_coding	protein kinase cAMP-dependent type I regulatory subunit alpha [Source:HGNC Symbol;Acc:HGNC:9388]
ENSG00000005249	-0.232966	-0.210596	0.00708041	0.020075	PRKAR2B	protein_coding	protein kinase cAMP-dependent type II regulatory subunit beta [Source:HGNC Symbol;Acc:HGNC:9392]
ENSG00000067606	-0.325797	-0.209128	0.000635765	0.0156016	PRKCZ	protein_coding	protein kinase C zeta [Source:HGNC Symbol;Acc:HGNC:9412]
ENSG00000183943	-0.118934	-0.123854	0.0146546	0.0200568	PRKX	protein_coding	protein kinase X-linked [Source:HGNC Symbol;Acc:HGNC:9441]
ENSG00000283526	-0.16864	-0.321095	0.0342561	0.00254021	PRRT1B	protein_coding	proline rich transmembrane protein 1B [Source:HGNC Symbol;Acc:HGNC:53642]
ENSG00000163704	-0.335985	-0.35551	0.00131436	0.00225354	PRRT3	protein_coding	proline rich transmembrane protein 3 [Source:HGNC Symbol;Acc:HGNC:26591]
ENSG00000257621	-0.359872	-0.18839	6.34518e-05	0.00813744	PSMA3-AS1	lncRNA	PSMA3 antisense RNA 1 [Source:HGNC Symbol;Acc:HGNC:26445]
ENSG00000149177	-0.210751	-0.212259	0.00423499	0.00770461	PTPRJ	protein_coding	protein tyrosine phosphatase receptor type J [Source:HGNC Symbol;Acc:HGNC:9673]
ENSG00000100362	-0.992303	-0.875254	0.016683	0.0445961	PVALB	protein_coding	parvalbumin [Source:HGNC Symbol;Acc:HGNC:9704]
ENSG00000103485	-0.826419	-0.638872	1.00941e-05	0.000217007	QPRT	protein_coding	quinolinate phosphoribosyltransferase [Source:HGNC Symbol;Acc:HGNC:9755]
ENSG00000124839	-0.227162	-0.345615	0.0042256	0.000926886	RAB17	protein_coding	RAB17, member RAS oncogene family [Source:HGNC Symbol;Acc:HGNC:16523]
ENSG00000167964	-0.539557	-0.336416	0.000250786	0.00914252	RAB26	protein_coding	RAB26, member RAS oncogene family [Source:HGNC Symbol;Acc:HGNC:14259]
ENSG00000076864	-0.451024	-0.245402	1.94648e-05	0.00277644	RAP1GAP	protein_coding	RAP1 GTPase activating protein [Source:HGNC Symbol;Acc:HGNC:9858]
ENSG00000165105	-0.171158	-0.272958	0.022381	0.00384656	RASEF	protein_coding	RAS and EF-hand domain containing [Source:HGNC Symbol;Acc:HGNC:26464]
ENSG00000136144	-0.132271	-0.171646	0.0283377	0.0139482	RCBTB1	protein_coding	RCC1 and BTB domain containing protein 1 [Source:HGNC Symbol;Acc:HGNC:18243]
ENSG00000129625	-0.152797	-0.144561	0.00605329	0.0144731	REEP5	protein_coding	receptor accessory protein 5 [Source:HGNC Symbol;Acc:HGNC:30077]
ENSG00000144567	-0.134579	-0.170151	0.00468484	0.00270392	RETREG2	protein_coding	reticulophagy regulator family member 2 [Source:HGNC Symbol;Acc:HGNC:28450]
ENSG00000087903	-0.470801	-0.29976	0.000556889	0.0146695	RFX2	protein_coding	regulatory factor X2 [Source:HGNC Symbol;Acc:HGNC:9983]
ENSG00000143390	-0.395465	-0.195126	2.97534e-05	0.00621711	RFX5	protein_coding	regulatory factor X5 [Source:HGNC Symbol;Acc:HGNC:9986]
ENSG00000150977	-0.461799	-0.238023	0.000156907	0.0163112	RILPL2	protein_coding	Rab interacting lysosomal protein like 2 [Source:HGNC Symbol;Acc:HGNC:28787]
ENSG00000101695	-0.424989	-0.371345	0.00561037	0.0192966	RNF125	protein_coding	ring finger protein 125 [Source:HGNC Symbol;Acc:HGNC:21150]
ENSG00000133135	-0.555895	-0.671883	0.0121858	0.00832416	RNF128	protein_coding	ring finger protein 128 [Source:HGNC Symbol;Acc:HGNC:21153]
ENSG00000101654	-0.0951564	-0.114864	0.0395262	0.0267683	RNMT	protein_coding	RNA guanine-7 methyltransferase [Source:HGNC Symbol;Acc:HGNC:10075]
ENSG00000177519	-0.724547	-0.524071	0.000563496	0.00799011	RPRM	protein_coding	reprimo, TP53 dependent G2 arrest mediator homolog [Source:HGNC Symbol;Acc:HGNC:24201]
ENSG00000136444	-0.137676	-0.158825	0.0128956	0.01102	RSAD1	protein_coding	radical S-adenosyl methionine domain containing 1 [Source:HGNC Symbol;Acc:HGNC:25634]
ENSG00000212747	-0.127499	-0.271645	0.012903	0.000412632	RTL8B	protein_coding	retrotransposon Gag like 8B [Source:HGNC Symbol;Acc:HGNC:33156]
ENSG00000185924	-0.216621	-0.203669	0.00421762	0.0106031	RTN4RL1	protein_coding	reticulon 4 receptor like 1 [Source:HGNC Symbol;Acc:HGNC:21329]
ENSG00000140688	-0.125402	-0.118048	0.0161794	0.033787	RUSF1	protein_coding	RUS family member 1 [Source:HGNC Symbol;Acc:HGNC:25848]
ENSG00000186350	-0.204175	-0.186588	0.00663217	0.0181083	RXRA	protein_coding	retinoid X receptor alpha [Source:HGNC Symbol;Acc:HGNC:10477]
ENSG00000204231	-0.23377	-0.167342	0.00227628	0.0232412	RXRB	protein_coding	retinoid X receptor beta [Source:HGNC Symbol;Acc:HGNC:10478]
ENSG00000165821	-0.858861	-0.407893	3.30198e-06	0.00143257	SALL2	protein_coding	spalt like transcription factor 2 [Source:HGNC Symbol;Acc:HGNC:10526]
ENSG00000101115	-0.517208	-0.249099	2.97534e-05	0.00705736	SALL4	protein_coding	spalt like transcription factor 4 [Source:HGNC Symbol;Acc:HGNC:15924]
ENSG00000004139	-0.176861	-0.270613	0.0470649	0.0110279	SARM1	protein_coding	sterile alpha and TIR motif containing 1 [Source:HGNC Symbol;Acc:HGNC:17074]
ENSG00000111961	-0.204588	-0.457899	0.0355897	0.00114074	SASH1	protein_coding	SAM and SH3 domain containing 1 [Source:HGNC Symbol;Acc:HGNC:19182]
ENSG00000213079	-0.113578	-0.170046	0.0149452	0.00344944	SCAF8	protein_coding	SR-related CTD associated factor 8 [Source:HGNC Symbol;Acc:HGNC:20959]
ENSG00000214279	-0.543117	-0.574135	0.0238537	0.0291448	SCART1	protein_coding	scavenger receptor family member expressed on T cells 1 [Source:HGNC Symbol;Acc:HGNC:32411]
ENSG00000143653	-0.228837	-0.172401	0.00282512	0.0217894	SCCPDH	protein_coding	saccharopine dehydrogenase (putative) [Source:HGNC Symbol;Acc:HGNC:24275]
ENSG00000006747	-0.146164	-0.302219	0.00632427	0.000218995	SCIN	protein_coding	scinderin [Source:HGNC Symbol;Acc:HGNC:21695]
ENSG00000129657	-0.263775	-0.327683	0.00532472	0.00327275	SEC14L1	protein_coding	SEC14 like lipid binding 1 [Source:HGNC Symbol;Acc:HGNC:10698]
ENSG00000071537	-0.161866	-0.243721	0.00469492	0.00111328	SEL1L	protein_coding	SEL1L adaptor subunit of ERAD E3 ubiquitin ligase [Source:HGNC Symbol;Acc:HGNC:10717]
ENSG00000007908	-1.68083	-0.581099	2.47542e-06	0.00525643	SELE	protein_coding	selectin E [Source:HGNC Symbol;Acc:HGNC:10718]
ENSG00000250722	-0.630202	-0.476905	0.00203283	0.0169982	SELENOP	protein_coding	selenoprotein P [Source:HGNC Symbol;Acc:HGNC:10751]
ENSG00000164300	-0.171871	-0.185243	0.0231454	0.0258083	SERINC5	protein_coding	serine incorporator 5 [Source:HGNC Symbol;Acc:HGNC:18825]
ENSG00000170542	-0.672047	-0.305613	8.57844e-05	0.0194771	SERPINB9	protein_coding	serpin family B member 9 [Source:HGNC Symbol;Acc:HGNC:8955]
ENSG00000130766	-0.266454	-0.23821	0.000793903	0.00360445	SESN2	protein_coding	sestrin 2 [Source:HGNC Symbol;Acc:HGNC:20746]
ENSG00000130147	-0.359621	-0.338347	0.00158315	0.00484294	SH3BP4	protein_coding	SH3 domain binding protein 4 [Source:HGNC Symbol;Acc:HGNC:10826]
ENSG00000107338	-0.213804	-0.396644	0.00243246	0.000157421	SHB	protein_coding	SH2 domain containing adaptor protein B [Source:HGNC Symbol;Acc:HGNC:10838]
ENSG00000237515	-0.124919	-0.132737	0.0289293	0.0342838	SHISA9	protein_coding	shisa family member 9 [Source:HGNC Symbol;Acc:HGNC:37231]
ENSG00000275993	-0.293586	-0.395001	0.0230189	0.00920642	SIK1B	protein_coding	salt inducible kinase 1B (putative) [Source:HGNC Symbol;Acc:HGNC:52389]
ENSG00000126778	-0.638591	-0.290021	3.30198e-06	0.00171564	SIX1	protein_coding	SIX homeobox 1 [Source:HGNC Symbol;Acc:HGNC:10887]
ENSG00000124140	-0.384792	-0.228396	0.000744289	0.0245575	SLC12A5	protein_coding	solute carrier family 12 member 5 [Source:HGNC Symbol;Acc:HGNC:13818]
ENSG00000137266	-0.27752	-0.250324	0.0110431	0.0293731	SLC22A23	protein_coding	solute carrier family 22 member 23 [Source:HGNC Symbol;Acc:HGNC:21106]
ENSG00000074621	-0.119255	-0.186085	0.038658	0.00799011	SLC24A1	protein_coding	solute carrier family 24 member 1 [Source:HGNC Symbol;Acc:HGNC:10975]
ENSG00000181045	-0.348073	-0.256034	0.0015445	0.0158039	SLC26A11	protein_coding	solute carrier family 26 member 11 [Source:HGNC Symbol;Acc:HGNC:14471]
ENSG00000149150	-0.424852	-0.421538	0.00073887	0.00201898	SLC43A1	protein_coding	solute carrier family 43 member 1 [Source:HGNC Symbol;Acc:HGNC:9225]
ENSG00000139508	-0.161455	-0.309352	0.0434745	0.00322058	SLC46A3	protein_coding	solute carrier family 46 member 3 [Source:HGNC Symbol;Acc:HGNC:27501]
ENSG00000065923	-0.164544	-0.200771	0.0242818	0.0157762	SLC9A7	protein_coding	solute carrier family 9 member A7 [Source:HGNC Symbol;Acc:HGNC:17123]
ENSG00000174640	-0.597462	-0.478787	0.000338108	0.00318456	SLCO2A1	protein_coding	solute carrier organic anion transporter family member 2A1 [Source:HGNC Symbol;Acc:HGNC:10955]
ENSG00000187122	-0.479286	-0.881255	7.05956e-05	4.82857e-06	SLIT1	protein_coding	slit guidance ligand 1 [Source:HGNC Symbol;Acc:HGNC:11085]
ENSG00000145147	-0.222433	-0.371844	0.0310377	0.00437739	SLIT2	protein_coding	slit guidance ligand 2 [Source:HGNC Symbol;Acc:HGNC:11086]
ENSG00000166949	-0.290112	-0.164058	0.000462681	0.0215962	SMAD3	protein_coding	SMAD family member 3 [Source:HGNC Symbol;Acc:HGNC:6769]
ENSG00000084070	-0.198954	-0.203358	0.00446173	0.00745987	SMAP2	protein_coding	small ArfGAP2 [Source:HGNC Symbol;Acc:HGNC:25082]
ENSG00000102038	-0.992102	-0.717471	0.000942218	0.0119238	SMARCA1	protein_coding	SWI/SNF related, matrix associated, actin dependent regulator of chromatin, subfamily a, member 1 [Source:HGNC Symbol;Acc:HGNC:11097]
ENSG00000166311	-0.339735	-0.415096	0.0101475	0.00659647	SMPD1	protein_coding	sphingomyelin phosphodiesterase 1 [Source:HGNC Symbol;Acc:HGNC:11120]
ENSG00000173267	-0.361687	-0.574294	0.00148867	0.000243675	SNCG	protein_coding	synuclein gamma [Source:HGNC Symbol;Acc:HGNC:11141]
ENSG00000124104	-0.254403	-0.277265	0.0059029	0.00705736	SNX21	protein_coding	sorting nexin family member 21 [Source:HGNC Symbol;Acc:HGNC:16154]
ENSG00000048471	-0.208962	-0.166773	0.00826317	0.0388189	SNX29	protein_coding	sorting nexin 29 [Source:HGNC Symbol;Acc:HGNC:30542]
ENSG00000173548	-0.311475	-0.195729	0.00244662	0.0424614	SNX33	protein_coding	sorting nexin 33 [Source:HGNC Symbol;Acc:HGNC:28468]
ENSG00000137642	-0.305822	-0.2794	4.63445e-05	0.000305198	SORL1	protein_coding	sortilin related receptor 1 [Source:HGNC Symbol;Acc:HGNC:11185]
ENSG00000198142	-0.37191	-0.389473	8.38539e-05	0.000218995	SOWAHC	protein_coding	sosondowah ankyrin repeat domain family member C [Source:HGNC Symbol;Acc:HGNC:26149]
ENSG00000008294	-0.125947	-0.104684	0.0134767	0.0476616	SPAG9	protein_coding	sperm associated antigen 9 [Source:HGNC Symbol;Acc:HGNC:14524]
ENSG00000113140	-0.737213	-0.563699	0.000165851	0.00237898	SPARC	protein_coding	secreted protein acidic and cysteine rich [Source:HGNC Symbol;Acc:HGNC:11219]
ENSG00000104133	-0.171332	-0.149255	0.00380607	0.0142341	SPG11	protein_coding	SPG11 vesicle trafficking associated, spatacsin [Source:HGNC Symbol;Acc:HGNC:11226]
ENSG00000164056	-0.551865	-0.632851	0.003015	0.00297076	SPRY1	protein_coding	sprouty RTK signaling antagonist 1 [Source:HGNC Symbol;Acc:HGNC:11269]
ENSG00000072310	-0.145582	-0.166795	0.049859	0.0420775	SREBF1	protein_coding	sterol regulatory element binding transcription factor 1 [Source:HGNC Symbol;Acc:HGNC:11289]
ENSG00000117758	-0.197965	-0.151201	0.00257231	0.0192594	STX12	protein_coding	syntaxin 12 [Source:HGNC Symbol;Acc:HGNC:11430]
ENSG00000136854	-0.260841	-0.164573	0.000851029	0.0205699	STXBP1	protein_coding	syntaxin binding protein 1 [Source:HGNC Symbol;Acc:HGNC:11444]
ENSG00000139531	-0.557248	-0.278689	1.56203e-05	0.00360445	SUOX	protein_coding	sulfite oxidase [Source:HGNC Symbol;Acc:HGNC:11460]
ENSG00000148290	-0.138026	-0.127896	0.00933108	0.0224614	SURF1	protein_coding	SURF1 cytochrome c oxidase assembly factor [Source:HGNC Symbol;Acc:HGNC:11474]
ENSG00000117614	-0.133984	-0.185172	0.0232417	0.00821461	SYF2	protein_coding	SYF2 pre-mRNA splicing factor [Source:HGNC Symbol;Acc:HGNC:19824]
ENSG00000197283	-0.210981	-0.349684	0.0108461	0.00149071	SYNGAP1	protein_coding	synaptic Ras GTPase activating protein 1 [Source:HGNC Symbol;Acc:HGNC:11497]
ENSG00000100321	-0.323913	-0.416232	0.00491433	0.00258583	SYNGR1	protein_coding	synaptogyrin 1 [Source:HGNC Symbol;Acc:HGNC:11498]
ENSG00000213463	-0.379392	-0.145349	8.0121e-05	0.0387918	SYNJ2BP	protein_coding	synaptojanin 2 binding protein [Source:HGNC Symbol;Acc:HGNC:18955]
ENSG00000275066	-0.145817	-0.109104	0.00607433	0.0398838	SYNRG	protein_coding	synergin gamma [Source:HGNC Symbol;Acc:HGNC:557]
ENSG00000173227	-0.323417	-0.314914	0.000655118	0.00201669	SYT12	protein_coding	synaptotagmin 12 [Source:HGNC Symbol;Acc:HGNC:18381]
ENSG00000103528	-0.649186	-0.243076	2.04998e-06	0.00284082	SYT17	protein_coding	synaptotagmin 17 [Source:HGNC Symbol;Acc:HGNC:24119]
ENSG00000137501	-0.223811	-0.305009	0.00169493	0.000749819	SYTL2	protein_coding	synaptotagmin like 2 [Source:HGNC Symbol;Acc:HGNC:15585]
ENSG00000157625	-0.140786	-0.125246	0.0144167	0.0387741	TAB3	protein_coding	TGF-beta activated kinase 1 (MAP3K7) binding protein 3 [Source:HGNC Symbol;Acc:HGNC:30681]
ENSG00000170921	-0.128252	-0.257396	0.0330495	0.00186725	TANC2	protein_coding	tetratricopeptide repeat, ankyrin repeat and coiled-coil containing 2 [Source:HGNC Symbol;Acc:HGNC:30212]
ENSG00000231925	-0.247336	-0.23827	0.0249556	0.0440519	TAPBP	protein_coding	TAP binding protein [Source:HGNC Symbol;Acc:HGNC:11566]
ENSG00000167202	-0.331778	-0.190482	0.000359898	0.0174163	TBC1D2B	protein_coding	TBC1 domain family member 2B [Source:HGNC Symbol;Acc:HGNC:29183]
ENSG00000131374	-0.128957	-0.101553	0.00791791	0.0394952	TBC1D5	protein_coding	TBC1 domain family member 5 [Source:HGNC Symbol;Acc:HGNC:19166]
ENSG00000135111	-1.02677	-0.7213	1.2364e-06	2.88545e-05	TBX3	protein_coding	T-box transcription factor 3 [Source:HGNC Symbol;Acc:HGNC:11602]
ENSG00000167074	-0.486806	-0.282677	1.65582e-05	0.00178938	TEF	protein_coding	TEF transcription factor, PAR bZIP family member [Source:HGNC Symbol;Acc:HGNC:11722]
ENSG00000137203	-0.420641	-0.284304	0.00055723	0.010984	TFAP2A	protein_coding	transcription factor AP-2 alpha [Source:HGNC Symbol;Acc:HGNC:11742]
ENSG00000119699	-0.663374	-0.204832	3.07377e-06	0.0106621	TGFB3	protein_coding	transforming growth factor beta 3 [Source:HGNC Symbol;Acc:HGNC:11769]
ENSG00000198959	-0.775565	-0.891058	0.0230952	0.019566	TGM2	protein_coding	transglutaminase 2 [Source:HGNC Symbol;Acc:HGNC:11778]
ENSG00000125304	-0.139745	-0.127032	0.0160486	0.0387084	TM9SF2	protein_coding	transmembrane 9 superfamily member 2 [Source:HGNC Symbol;Acc:HGNC:11865]
ENSG00000135926	-1.08604	-0.556254	6.98791e-05	0.00953414	TMBIM1	protein_coding	transmembrane BAX inhibitor motif containing 1 [Source:HGNC Symbol;Acc:HGNC:23410]
ENSG00000139644	-0.140638	-0.0962119	0.00169263	0.0231537	TMBIM6	protein_coding	transmembrane BAX inhibitor motif containing 6 [Source:HGNC Symbol;Acc:HGNC:11723]
ENSG00000103534	-0.591142	-0.54934	0.00494019	0.0132264	TMC5	protein_coding	transmembrane channel like 5 [Source:HGNC Symbol;Acc:HGNC:22999]
ENSG00000121210	-0.208906	-0.253042	0.000526981	0.000479877	TMEM131L	protein_coding	transmembrane 131 like [Source:HGNC Symbol;Acc:HGNC:29146]
ENSG00000166575	-0.209738	-0.161937	0.00617598	0.0356584	TMEM135	protein_coding	transmembrane protein 135 [Source:HGNC Symbol;Acc:HGNC:26167]
ENSG00000249242	-0.224254	-0.266859	0.00284734	0.00233614	TMEM150C	protein_coding	transmembrane protein 150C [Source:HGNC Symbol;Acc:HGNC:37263]
ENSG00000137103	-0.206645	-0.240244	0.038067	0.0303628	TMEM8B	protein_coding	transmembrane protein 8B [Source:HGNC Symbol;Acc:HGNC:21427]
ENSG00000184012	-0.31616	-0.366391	0.0205765	0.0168314	TMPRSS2	protein_coding	transmembrane serine protease 2 [Source:HGNC Symbol;Acc:HGNC:11876]
ENSG00000131746	-0.606205	-0.46283	0.00881963	0.0477906	TNS4	protein_coding	tensin 4 [Source:HGNC Symbol;Acc:HGNC:24352]
ENSG00000164938	-0.451629	-0.292532	2.73283e-05	0.00142415	TP53INP1	protein_coding	tumor protein p53 inducible nuclear protein 1 [Source:HGNC Symbol;Acc:HGNC:18022]
ENSG00000166340	-0.294836	-0.227756	0.000964016	0.0087579	TPP1	protein_coding	tripeptidyl peptidase 1 [Source:HGNC Symbol;Acc:HGNC:2073]
ENSG00000182606	-0.410092	-0.138459	3.65114e-05	0.0400736	TRAK1	protein_coding	trafficking kinesin protein 1 [Source:HGNC Symbol;Acc:HGNC:29947]
ENSG00000170043	-0.210675	-0.13881	0.00221458	0.0329295	TRAPPC1	protein_coding	trafficking protein particle complex 1 [Source:HGNC Symbol;Acc:HGNC:19894]
ENSG00000007255	-0.143567	-0.208655	0.0345455	0.00988231	TRAPPC6A	protein_coding	trafficking protein particle complex 6A [Source:HGNC Symbol;Acc:HGNC:23069]
ENSG00000167632	-0.247231	-0.208675	0.00288545	0.0134439	TRAPPC9	protein_coding	trafficking protein particle complex 9 [Source:HGNC Symbol;Acc:HGNC:30832]
ENSG00000173334	-0.214651	-0.180666	0.00246334	0.0119909	TRIB1	protein_coding	tribbles pseudokinase 1 [Source:HGNC Symbol;Acc:HGNC:16891]
ENSG00000122779	-0.333351	-0.373137	0.000167017	0.000276882	TRIM24	protein_coding	tripartite motif containing 24 [Source:HGNC Symbol;Acc:HGNC:11812]
ENSG00000166436	-0.151851	-0.166591	0.0402105	0.0406022	TRIM66	protein_coding	tripartite motif containing 66 [Source:HGNC Symbol;Acc:HGNC:29005]
ENSG00000011105	-0.194855	-0.230083	0.0123716	0.00940909	TSPAN9	protein_coding	tetraspanin 9 [Source:HGNC Symbol;Acc:HGNC:21640]
ENSG00000189241	-0.105588	-0.173388	0.0129019	0.00188438	TSPYL1	protein_coding	TSPY like 1 [Source:HGNC Symbol;Acc:HGNC:12382]
ENSG00000184205	-0.261801	-0.240905	0.00333641	0.00979716	TSPYL2	protein_coding	TSPY like 2 [Source:HGNC Symbol;Acc:HGNC:24358]
ENSG00000052841	-0.155628	-0.169644	0.0164283	0.018076	TTC17	protein_coding	tetratricopeptide repeat domain 17 [Source:HGNC Symbol;Acc:HGNC:25596]
ENSG00000205838	-0.493719	-0.48642	0.0135128	0.023718	TTC23L	protein_coding	tetratricopeptide repeat domain 23 like [Source:HGNC Symbol;Acc:HGNC:26355]
ENSG00000186591	-0.107516	-0.110013	0.0326219	0.0439666	UBE2H	protein_coding	ubiquitin conjugating enzyme E2 H [Source:HGNC Symbol;Acc:HGNC:12484]
ENSG00000215218	-0.252033	-0.241406	0.0118078	0.02372	UBE2QL1	protein_coding	ubiquitin conjugating enzyme E2 Q family like 1 [Source:HGNC Symbol;Acc:HGNC:37269]
ENSG00000188021	-0.139134	-0.097356	0.00567024	0.0487288	UBQLN2	protein_coding	ubiquilin 2 [Source:HGNC Symbol;Acc:HGNC:12509]
ENSG00000167671	-0.149703	-0.189449	0.039312	0.021554	UBXN6	protein_coding	UBX domain protein 6 [Source:HGNC Symbol;Acc:HGNC:14928]
ENSG00000094841	-0.427707	-0.222271	0.000421339	0.0296376	UPRT	protein_coding	uracil phosphoribosyltransferase homolog [Source:HGNC Symbol;Acc:HGNC:28334]
ENSG00000102226	-0.231899	-0.213297	0.00192191	0.00631368	USP11	protein_coding	ubiquitin specific peptidase 11 [Source:HGNC Symbol;Acc:HGNC:12609]
ENSG00000172046	-0.160924	-0.141595	0.0161746	0.0439882	USP19	protein_coding	ubiquitin specific peptidase 19 [Source:HGNC Symbol;Acc:HGNC:12617]
ENSG00000036672	-0.3448	-0.380929	0.048339	0.0467207	USP2	protein_coding	ubiquitin specific peptidase 2 [Source:HGNC Symbol;Acc:HGNC:12618]
ENSG00000135093	-0.302346	-0.24401	0.00159511	0.0103342	USP30	protein_coding	ubiquitin specific peptidase 30 [Source:HGNC Symbol;Acc:HGNC:20065]
ENSG00000085982	-0.107637	-0.119976	0.0392343	0.0372013	USP40	protein_coding	ubiquitin specific peptidase 40 [Source:HGNC Symbol;Acc:HGNC:20069]
ENSG00000071246	-0.679979	-0.326148	0.000115525	0.0184429	VASH1	protein_coding	vasohibin 1 [Source:HGNC Symbol;Acc:HGNC:19964]
ENSG00000127831	-1.30266	-0.801835	5.9818e-05	0.0033911	VIL1	protein_coding	villin 1 [Source:HGNC Symbol;Acc:HGNC:12690]
ENSG00000075399	-0.210993	-0.317757	0.0456129	0.011578	VPS9D1	protein_coding	VPS9 domain containing 1 [Source:HGNC Symbol;Acc:HGNC:13526]
ENSG00000132471	-0.162365	-0.189821	0.00313686	0.00281527	WBP2	protein_coding	WW domain binding protein 2 [Source:HGNC Symbol;Acc:HGNC:12738]
ENSG00000140153	-0.156462	-0.150166	0.0162111	0.0311077	WDR20	protein_coding	WD repeat domain 20 [Source:HGNC Symbol;Acc:HGNC:19667]
ENSG00000171475	-0.157406	-0.0835813	0.00106117	0.0485017	WIPF2	protein_coding	WAS/WASL interacting protein family member 2 [Source:HGNC Symbol;Acc:HGNC:30923]
ENSG00000126562	-1.53038	-0.675161	0.000127673	0.0283191	WNK4	protein_coding	WNK lysine deficient protein kinase 4 [Source:HGNC Symbol;Acc:HGNC:14544]
ENSG00000143324	-0.151209	-0.179688	0.00858378	0.00645929	XPR1	protein_coding	xenotropic and polytropic retrovirus receptor 1 [Source:HGNC Symbol;Acc:HGNC:12827]
ENSG00000103489	-0.561217	-0.984957	0.0271197	0.00291194	XYLT1	protein_coding	xylosyltransferase 1 [Source:HGNC Symbol;Acc:HGNC:15516]
ENSG00000175155	-0.302009	-0.338048	0.00225023	0.0026619	YPEL2	protein_coding	yippee like 2 [Source:HGNC Symbol;Acc:HGNC:18326]
ENSG00000278995	-0.539786	-0.331172	0.000242124	0.00956807	Z69720.2	TEC	TEC
ENSG00000261188	-0.236484	-0.335402	0.0471846	0.0159103	Z95115.1	lncRNA	novel transcript, antisense to TFIP11
ENSG00000205189	-0.156169	-0.152701	0.00512206	0.0105087	ZBTB10	protein_coding	zinc finger and BTB domain containing 10 [Source:HGNC Symbol;Acc:HGNC:30953]
ENSG00000236104	-0.321542	-0.304879	0.0047938	0.0116555	ZBTB22	protein_coding	zinc finger and BTB domain containing 22 [Source:HGNC Symbol;Acc:HGNC:13085]
ENSG00000174282	-0.138603	-0.244938	0.029305	0.00307205	ZBTB4	protein_coding	zinc finger and BTB domain containing 4 [Source:HGNC Symbol;Acc:HGNC:23847]
ENSG00000179627	-0.206796	-0.193279	0.00462079	0.0121194	ZBTB42	protein_coding	zinc finger and BTB domain containing 42 [Source:HGNC Symbol;Acc:HGNC:32550]
ENSG00000153786	-0.245573	-0.298533	0.000102817	0.000110783	ZDHHC7	protein_coding	zinc finger DHHC-type palmitoyltransferase 7 [Source:HGNC Symbol;Acc:HGNC:18459]
ENSG00000133519	-0.952352	-0.438651	7.66629e-05	0.0170622	ZDHHC8P1	transcribed_unprocessed_pseudogene	ZDHHC8 pseudogene 1 [Source:HGNC Symbol;Acc:HGNC:26461]
ENSG00000179588	-0.476088	-0.38679	0.00969394	0.0405452	ZFPM1	protein_coding	zinc finger protein, FOG family member 1 [Source:HGNC Symbol;Acc:HGNC:19762]
ENSG00000152977	-0.388236	-0.275616	0.00159435	0.0189311	ZIC1	protein_coding	Zic family member 1 [Source:HGNC Symbol;Acc:HGNC:12872]
ENSG00000106261	-0.182677	-0.171348	0.00455611	0.0117283	ZKSCAN1	protein_coding	zinc finger with KRAB and SCAN domains 1 [Source:HGNC Symbol;Acc:HGNC:13101]
ENSG00000147130	-0.213262	-0.098925	0.000458907	0.0485618	ZMYM3	protein_coding	zinc finger MYM-type containing 3 [Source:HGNC Symbol;Acc:HGNC:13054]
ENSG00000171940	-0.181862	-0.104499	0.00136462	0.0417019	ZNF217	protein_coding	zinc finger protein 217 [Source:HGNC Symbol;Acc:HGNC:13009]
ENSG00000171467	-0.175735	-0.158694	0.00203283	0.00724403	ZNF318	protein_coding	zinc finger protein 318 [Source:HGNC Symbol;Acc:HGNC:13578]
ENSG00000181894	-0.375797	-0.193493	0.000119992	0.0137949	ZNF329	protein_coding	zinc finger protein 329 [Source:HGNC Symbol;Acc:HGNC:14209]
ENSG00000256683	-0.247395	-0.279104	0.0214271	0.0197192	ZNF350	protein_coding	zinc finger protein 350 [Source:HGNC Symbol;Acc:HGNC:16656]
ENSG00000174586	-0.64416	-0.503991	6.11522e-05	0.00100934	ZNF497	protein_coding	zinc finger protein 497 [Source:HGNC Symbol;Acc:HGNC:23714]
ENSG00000164684	-0.205941	-0.314779	0.00457153	0.000976224	ZNF704	protein_coding	zinc finger protein 704 [Source:HGNC Symbol;Acc:HGNC:32291]
ENSG00000147180	-0.191401	-0.244714	0.0196681	0.0100722	ZNF711	protein_coding	zinc finger protein 711 [Source:HGNC Symbol;Acc:HGNC:13128]
ENSG00000141579	-0.640005	-0.680787	0.00448552	0.00619711	ZNF750	protein_coding	zinc finger protein 750 [Source:HGNC Symbol;Acc:HGNC:25843]
ENSG00000162086	-0.195368	-0.2802	0.0158589	0.00457529	ZNF75A	protein_coding	zinc finger protein 75a [Source:HGNC Symbol;Acc:HGNC:13146]
ENSG00000152443	-0.135173	-0.282213	0.0449338	0.00221555	ZNF776	protein_coding	zinc finger protein 776 [Source:HGNC Symbol;Acc:HGNC:26765]
ENSG00000180884	-0.508599	-0.369229	0.000733733	0.00955254	ZNF792	protein_coding	zinc finger protein 792 [Source:HGNC Symbol;Acc:HGNC:24751]
ENSG00000166529	-0.311885	-0.150511	0.000309692	0.0337353	ZSCAN21	protein_coding	zinc finger and SCAN domain containing 21 [Source:HGNC Symbol;Acc:HGNC:13104]

## Sheet: KD_effect_venn_up
GeneID	logFC_kdA	logFC_kdB	adjP_seqA	adjP_seqB	Gene_Name	Gene_type	Description
ENSG00000099204	0.392001	0.198744	4.2242e-05	0.00705736	ABLIM1	protein_coding	actin binding LIM protein 1 [Source:HGNC Symbol;Acc:HGNC:78]
ENSG00000251259	0.323715	0.51546	0.0491114	0.00954156	AC004069.1	lncRNA	novel transcript
ENSG00000256433	0.436467	0.494144	0.00249008	0.00274275	AC005840.2	lncRNA	novel transcript
ENSG00000267575	0.949192	0.450574	0.000458899	0.0444479	AC006504.5	lncRNA	novel transcript
ENSG00000288559	0.334846	0.397073	0.0457628	0.0337353	AC016394.2	lncRNA	novel transcript
ENSG00000230551	0.214779	0.26168	0.00227628	0.0017639	AC021078.1	lncRNA	novel transcript
ENSG00000269954	2.56082	1.1595	6.352e-05	0.0163459	AC022239.1	lncRNA	novel transcript, antisense to BLK
ENSG00000278864	0.476678	0.332743	0.0028597	0.0308354	AC055811.4	TEC	novel transcript
ENSG00000284024	0.319929	0.331441	0.000860893	0.00182224	AC069544.2	protein_coding	zinc finger and SCAN domain containing 29 [Source:NCBI gene (formerly Entrezgene);Acc:100421372]
ENSG00000286208	0.369511	0.373265	0.00808322	0.0135993	AC093838.1	lncRNA	novel transcript
ENSG00000252690	0.498191	0.465963	0.00712005	0.0173968	AC105339.2	lncRNA	TEC
ENSG00000279500	0.79123	0.700369	0.0140446	0.0387741	AC108704.2	TEC	novel transcript
ENSG00000256663	0.304085	0.244308	0.0114151	0.0476616	AC112777.1	processed_pseudogene	ubiquitin-like with PHD and ring finger domains 1 (UHRF1) pseudogene
ENSG00000279283	0.929269	1.00421	0.00326203	0.00435632	AC131009.4	TEC	novel transcript
ENSG00000246465	0.842203	0.78756	0.0127503	0.0281316	AC138904.1	lncRNA	novel transcript LOC100506705
ENSG00000078124	0.359342	0.249967	0.000695281	0.0114293	ACER3	protein_coding	alkaline ceramidase 3 [Source:HGNC Symbol;Acc:HGNC:16066]
ENSG00000143727	0.0938985	0.146238	0.0334463	0.0068514	ACP1	protein_coding	acid phosphatase 1 [Source:HGNC Symbol;Acc:HGNC:122]
ENSG00000133627	0.212864	0.152038	0.00499978	0.0415856	ACTR3B	protein_coding	actin related protein 3B [Source:HGNC Symbol;Acc:HGNC:17256]
ENSG00000106526	0.173205	0.188329	0.0224125	0.0239564	ACTR3C	protein_coding	actin related protein 3C [Source:HGNC Symbol;Acc:HGNC:37282]
ENSG00000196839	0.927197	0.567949	0.000697585	0.0204426	ADA	protein_coding	adenosine deaminase [Source:HGNC Symbol;Acc:HGNC:186]
ENSG00000065457	0.13704	0.122223	0.00631619	0.0195343	ADAT1	protein_coding	adenosine deaminase tRNA specific 1 [Source:HGNC Symbol;Acc:HGNC:228]
ENSG00000164742	0.521624	0.286176	0.000420061	0.0230758	ADCY1	protein_coding	adenylate cyclase 1 [Source:HGNC Symbol;Acc:HGNC:232]
ENSG00000138031	0.388554	0.200542	1.19557e-05	0.00250529	ADCY3	protein_coding	adenylate cyclase 3 [Source:HGNC Symbol;Acc:HGNC:234]
ENSG00000148700	0.685652	0.589328	0.0147001	0.0446522	ADD3	protein_coding	adducin 3 [Source:HGNC Symbol;Acc:HGNC:245]
ENSG00000006831	0.238256	0.135081	0.000121094	0.00873098	ADIPOR2	protein_coding	adiponectin receptor 2 [Source:HGNC Symbol;Acc:HGNC:24041]
ENSG00000198221	0.556021	0.681823	0.0403655	0.0254708	AFDN-DT	lncRNA	AFDN divergent transcript [Source:HGNC Symbol;Acc:HGNC:21236]
ENSG00000106305	0.119271	0.134264	0.0154705	0.0149464	AIMP2	protein_coding	aminoacyl tRNA synthetase complex interacting multifunctional protein 2 [Source:HGNC Symbol;Acc:HGNC:20609]
ENSG00000229425	0.583442	0.391954	4.32175e-05	0.00176997	AJ009632.2	lncRNA	novel transcript
ENSG00000276223	1.29959	0.738854	3.5384e-05	0.00341268	AL118522.1	lncRNA	novel transcript, sense intronic to KCNK15
ENSG00000275437	0.31662	0.544426	0.0283258	0.00340876	AL121832.3	lncRNA	novel transcript, sense intronic to CABLES2
ENSG00000285638	0.470594	0.651439	0.0120019	0.00420409	AL138927.1	lncRNA	novel transcript
ENSG00000273373	0.682265	0.726412	0.00215763	0.00327275	AL355488.1	lncRNA	novel transcript, antisense to SLC16A4
ENSG00000224934	0.569282	0.544382	0.0129784	0.0260693	AL391684.1	lncRNA	novel transcript
ENSG00000137124	0.238126	0.127324	0.000496407	0.0293017	ALDH1B1	protein_coding	aldehyde dehydrogenase 1 family member B1 [Source:HGNC Symbol;Acc:HGNC:407]
ENSG00000073331	0.340943	0.453285	0.00514412	0.00225354	ALPK1	protein_coding	alpha kinase 1 [Source:HGNC Symbol;Acc:HGNC:20917]
ENSG00000123505	0.334853	0.225866	0.000588485	0.011593	AMD1	protein_coding	adenosylmethionine decarboxylase 1 [Source:HGNC Symbol;Acc:HGNC:457]
ENSG00000174945	1.84117	1.45993	3.08441e-05	0.000508446	AMZ1	protein_coding	archaelysin family metallopeptidase 1 [Source:HGNC Symbol;Acc:HGNC:22231]
ENSG00000153107	0.282529	0.1957	0.000186319	0.00435632	ANAPC1	protein_coding	anaphase promoting complex subunit 1 [Source:HGNC Symbol;Acc:HGNC:19988]
ENSG00000182718	0.507269	0.269434	4.30203e-05	0.00575733	ANXA2	protein_coding	annexin A2 [Source:HGNC Symbol;Acc:HGNC:537]
ENSG00000237594	0.898089	0.674468	0.00115764	0.011578	AP000251.1	lncRNA	uncharacterized LOC150051 [Source:NCBI gene (formerly Entrezgene);Acc:150051]
ENSG00000255129	0.711034	0.957661	0.0392193	0.0164096	AP000880.1	lncRNA	novel transcript
ENSG00000152056	0.397243	0.48791	0.00118453	0.000964778	AP1S3	protein_coding	adaptor related protein complex 1 subunit sigma 3 [Source:HGNC Symbol;Acc:HGNC:18971]
ENSG00000070718	0.178016	0.137915	0.00249008	0.0177319	AP3M2	protein_coding	adaptor related protein complex 3 subunit mu 2 [Source:HGNC Symbol;Acc:HGNC:570]
ENSG00000214944	0.327523	0.183798	0.000124805	0.00922938	ARHGEF28	protein_coding	Rho guanine nucleotide exchange factor 28 [Source:HGNC Symbol;Acc:HGNC:30322]
ENSG00000236699	0.536896	0.353685	0.0021885	0.0327596	ARHGEF38	protein_coding	Rho guanine nucleotide exchange factor 38 [Source:HGNC Symbol;Acc:HGNC:25968]
ENSG00000138175	0.453319	0.226137	0.000128635	0.0166752	ARL3	protein_coding	ADP ribosylation factor like GTPase 3 [Source:HGNC Symbol;Acc:HGNC:694]
ENSG00000105011	0.133358	0.232721	0.0447098	0.00545212	ASF1B	protein_coding	anti-silencing function 1B histone chaperone [Source:HGNC Symbol;Acc:HGNC:20996]
ENSG00000156802	0.14031	0.304647	0.00812349	0.000218995	ATAD2	protein_coding	ATPase family AAA domain containing 2 [Source:HGNC Symbol;Acc:HGNC:30123]
ENSG00000176208	0.256914	0.379944	0.00131436	0.000332821	ATAD5	protein_coding	ATPase family AAA domain containing 5 [Source:HGNC Symbol;Acc:HGNC:25752]
ENSG00000127423	0.285105	0.212441	0.00535565	0.036914	AUNIP	protein_coding	aurora kinase A and ninein interacting protein [Source:HGNC Symbol;Acc:HGNC:28363]
ENSG00000160862	1.86731	0.971745	8.70969e-06	0.0019171	AZGP1	protein_coding	alpha-2-glycoprotein 1, zinc-binding [Source:HGNC Symbol;Acc:HGNC:910]
ENSG00000138376	0.198678	0.239667	0.0292329	0.0200506	BARD1	protein_coding	BRCA1 associated RING domain 1 [Source:HGNC Symbol;Acc:HGNC:952]
ENSG00000171791	1.39492	0.507982	4.18407e-07	0.000332821	BCL2	protein_coding	BCL2 apoptosis regulator [Source:HGNC Symbol;Acc:HGNC:990]
ENSG00000135697	0.313318	0.445503	0.0395262	0.0129822	BCO1	protein_coding	beta-carotene oxygenase 1 [Source:HGNC Symbol;Acc:HGNC:13815]
ENSG00000074582	0.223793	0.170016	0.000506513	0.00575507	BCS1L	protein_coding	BCS1 homolog, ubiquinol-cytochrome c reductase complex chaperone [Source:HGNC Symbol;Acc:HGNC:1020]
ENSG00000176171	0.401525	0.344535	0.00016077	0.0013114	BNIP3	protein_coding	BCL2 interacting protein 3 [Source:HGNC Symbol;Acc:HGNC:1084]
ENSG00000012048	0.155017	0.205439	0.00712039	0.00308005	BRCA1	protein_coding	BRCA1 DNA repair associated [Source:HGNC Symbol;Acc:HGNC:1100]
ENSG00000139618	0.2857	0.329764	0.00232289	0.00229381	BRCA2	protein_coding	BRCA2 DNA repair associated [Source:HGNC Symbol;Acc:HGNC:1101]
ENSG00000184992	0.102475	0.136551	0.029915	0.0131087	BRI3BP	protein_coding	BRI3 binding protein [Source:HGNC Symbol;Acc:HGNC:14251]
ENSG00000136492	0.331637	0.316073	0.000478382	0.00175537	BRIP1	protein_coding	BRCA1 interacting protein C-terminal helicase 1 [Source:HGNC Symbol;Acc:HGNC:20473]
ENSG00000064726	0.0967371	0.115434	0.0377179	0.0267749	BTBD1	protein_coding	BTB domain containing 1 [Source:HGNC Symbol;Acc:HGNC:1120]
ENSG00000137656	0.166964	0.308835	0.0178934	0.00142641	BUD13	protein_coding	BUD13 homolog [Source:HGNC Symbol;Acc:HGNC:28199]
ENSG00000171067	0.356418	0.20848	0.00120185	0.0358524	C11orf24	protein_coding	chromosome 11 open reading frame 24 [Source:HGNC Symbol;Acc:HGNC:1174]
ENSG00000182993	0.789669	0.752771	0.0124911	0.0254034	C12orf60	protein_coding	chromosome 12 open reading frame 60 [Source:HGNC Symbol;Acc:HGNC:28726]
ENSG00000235162	0.363527	0.609695	0.00243161	0.000277656	C12orf75	protein_coding	chromosome 12 open reading frame 75 [Source:HGNC Symbol;Acc:HGNC:35164]
ENSG00000166845	0.285087	0.621652	0.0238797	0.000804147	C18orf54	protein_coding	chromosome 18 open reading frame 54 [Source:HGNC Symbol;Acc:HGNC:13796]
ENSG00000142686	0.459128	0.288048	0.000878122	0.0215298	C1orf216	protein_coding	chromosome 1 open reading frame 216 [Source:HGNC Symbol;Acc:HGNC:26800]
ENSG00000168014	0.19896	0.167832	0.00263569	0.0125342	C2CD3	protein_coding	C2 domain containing 3 centriole elongation regulator [Source:HGNC Symbol;Acc:HGNC:24564]
ENSG00000075461	0.310146	0.168467	0.000471494	0.0263129	CACNG4	protein_coding	calcium voltage-gated channel auxiliary subunit gamma 4 [Source:HGNC Symbol;Acc:HGNC:1408]
ENSG00000084774	0.347141	0.166006	0.000177367	0.0245331	CAD	protein_coding	carbamoyl-phosphate synthetase 2, aspartate transcarbamylase, and dihydroorotase [Source:HGNC Symbol;Acc:HGNC:1424]
ENSG00000138172	0.503935	0.480635	0.00577943	0.0133328	CALHM2	protein_coding	calcium homeostasis modulator family member 2 [Source:HGNC Symbol;Acc:HGNC:23493]
ENSG00000112186	0.407777	0.195795	3.95224e-05	0.00873731	CAP2	protein_coding	cyclase associated actin cytoskeleton regulatory protein 2 [Source:HGNC Symbol;Acc:HGNC:20039]
ENSG00000159753	0.748633	0.360424	3.33143e-05	0.00773629	CARMIL2	protein_coding	capping protein regulator and myosin 1 linker 2 [Source:HGNC Symbol;Acc:HGNC:27089]
ENSG00000153113	0.162436	0.121087	0.00728567	0.0457885	CAST	protein_coding	calpastatin [Source:HGNC Symbol;Acc:HGNC:1515]
ENSG00000163006	0.211636	0.286784	0.046122	0.0190145	CCDC138	protein_coding	coiled-coil domain containing 138 [Source:HGNC Symbol;Acc:HGNC:26531]
ENSG00000120647	0.202308	0.210152	0.0256954	0.0337224	CCDC77	protein_coding	coiled-coil domain containing 77 [Source:HGNC Symbol;Acc:HGNC:28203]
ENSG00000105173	0.405047	0.325892	0.00587506	0.0287276	CCNE1	protein_coding	cyclin E1 [Source:HGNC Symbol;Acc:HGNC:1589]
ENSG00000175305	0.155376	0.359132	0.0330682	0.000889133	CCNE2	protein_coding	cyclin E2 [Source:HGNC Symbol;Acc:HGNC:1590]
ENSG00000135624	0.203749	0.239539	0.000420644	0.000459232	CCT7	protein_coding	chaperonin containing TCP1 subunit 7 [Source:HGNC Symbol;Acc:HGNC:1622]
ENSG00000156261	0.176629	0.145777	0.00690499	0.0293731	CCT8	protein_coding	chaperonin containing TCP1 subunit 8 [Source:HGNC Symbol;Acc:HGNC:1623]
ENSG00000002586	0.257472	0.199655	0.00167476	0.0132273	CD99	protein_coding	CD99 molecule (Xg blood group) [Source:HGNC Symbol;Acc:HGNC:7082]
ENSG00000164045	0.495199	0.338838	0.000307219	0.00667244	CDC25A	protein_coding	cell division cycle 25A [Source:HGNC Symbol;Acc:HGNC:1725]
ENSG00000093009	0.18914	0.254994	0.00236694	0.00107751	CDC45	protein_coding	cell division cycle 45 [Source:HGNC Symbol;Acc:HGNC:1739]
ENSG00000094804	0.388895	0.367627	0.000415767	0.0015993	CDC6	protein_coding	cell division cycle 6 [Source:HGNC Symbol;Acc:HGNC:1744]
ENSG00000097046	0.183521	0.318787	0.0108322	0.00115359	CDC7	protein_coding	cell division cycle 7 [Source:HGNC Symbol;Acc:HGNC:1745]
ENSG00000170779	0.145709	0.263017	0.0312373	0.00295968	CDCA4	protein_coding	cell division cycle associated 4 [Source:HGNC Symbol;Acc:HGNC:14625]
ENSG00000146670	0.185765	0.216082	0.00430588	0.00378223	CDCA5	protein_coding	cell division cycle associated 5 [Source:HGNC Symbol;Acc:HGNC:14626]
ENSG00000123374	0.142341	0.248584	0.0231502	0.00250257	CDK2	protein_coding	cyclin dependent kinase 2 [Source:HGNC Symbol;Acc:HGNC:1771]
ENSG00000176749	0.515593	0.415346	0.000621813	0.00503875	CDK5R1	protein_coding	cyclin dependent kinase 5 regulatory subunit 1 [Source:HGNC Symbol;Acc:HGNC:1775]
ENSG00000132964	0.214968	0.209316	0.0252156	0.0428428	CDK8	protein_coding	cyclin dependent kinase 8 [Source:HGNC Symbol;Acc:HGNC:1779]
ENSG00000115816	0.193753	0.136631	0.00560906	0.0469631	CEBPZ	protein_coding	CCAAT enhancer binding protein zeta [Source:HGNC Symbol;Acc:HGNC:24218]
ENSG00000166451	0.106333	0.302826	0.024358	0.000159991	CENPN	protein_coding	centromere protein N [Source:HGNC Symbol;Acc:HGNC:30873]
ENSG00000138092	0.214999	0.205017	0.000359169	0.00138954	CENPO	protein_coding	centromere protein O [Source:HGNC Symbol;Acc:HGNC:28152]
ENSG00000151725	0.204896	0.337493	0.00593366	0.000845632	CENPU	protein_coding	centromere protein U [Source:HGNC Symbol;Acc:HGNC:21348]
ENSG00000203760	0.227061	0.265549	0.0289979	0.0226247	CENPW	protein_coding	centromere protein W [Source:HGNC Symbol;Acc:HGNC:21488]
ENSG00000174799	0.178746	0.186012	0.0220255	0.0287041	CEP135	protein_coding	centrosomal protein 135 [Source:HGNC Symbol;Acc:HGNC:29086]
ENSG00000148019	0.128163	0.136216	0.0237947	0.0281985	CEP78	protein_coding	centrosomal protein 78 [Source:HGNC Symbol;Acc:HGNC:25740]
ENSG00000130695	0.263861	0.29234	0.000608138	0.000955568	CEP85	protein_coding	centrosomal protein 85 [Source:HGNC Symbol;Acc:HGNC:25309]
ENSG00000165410	0.172068	0.510399	0.0257425	0.000139237	CFL2	protein_coding	cofilin 2 [Source:HGNC Symbol;Acc:HGNC:1875]
ENSG00000164430	0.352581	0.361206	0.00645342	0.0102978	CGAS	protein_coding	cyclic GMP-AMP synthase [Source:HGNC Symbol;Acc:HGNC:21367]
ENSG00000159259	0.311589	0.224994	0.000767933	0.0101975	CHAF1B	protein_coding	chromatin assembly factor 1 subunit B [Source:HGNC Symbol;Acc:HGNC:1911]
ENSG00000149554	0.17165	0.167136	0.00967687	0.0187038	CHEK1	protein_coding	checkpoint kinase 1 [Source:HGNC Symbol;Acc:HGNC:1925]
ENSG00000111666	0.330742	0.236811	8.81911e-05	0.0021309	CHPT1	protein_coding	choline phosphotransferase 1 [Source:HGNC Symbol;Acc:HGNC:17852]
ENSG00000223960	0.413519	0.645106	0.0409685	0.00856784	CHROMR	lncRNA	cholesterol induced regulator of metabolism RNA [Source:HGNC Symbol;Acc:HGNC:54059]
ENSG00000163507	0.176847	0.325543	0.00421762	0.000276882	CIP2A	protein_coding	cellular inhibitor of PP2A [Source:HGNC Symbol;Acc:HGNC:29302]
ENSG00000074054	0.122675	0.151038	0.0248677	0.0155743	CLASP1	protein_coding	cytoplasmic linker associated protein 1 [Source:HGNC Symbol;Acc:HGNC:17088]
ENSG00000175505	0.446172	0.471441	0.0138009	0.0178657	CLCF1	protein_coding	cardiotrophin like cytokine factor 1 [Source:HGNC Symbol;Acc:HGNC:17412]
ENSG00000162994	0.242777	0.583269	0.0417786	0.000964778	CLHC1	protein_coding	clathrin heavy chain linker domain containing 1 [Source:HGNC Symbol;Acc:HGNC:26453]
ENSG00000113240	0.156059	0.235786	0.0182599	0.0041405	CLK4	protein_coding	CDC like kinase 4 [Source:HGNC Symbol;Acc:HGNC:13659]
ENSG00000092853	0.389514	0.38162	0.00712176	0.0140783	CLSPN	protein_coding	claspin [Source:HGNC Symbol;Acc:HGNC:19715]
ENSG00000184220	0.361716	0.28709	0.0016044	0.0114293	CMSS1	protein_coding	cms1 ribosomal small subunit homolog [Source:HGNC Symbol;Acc:HGNC:28666]
ENSG00000106603	0.13085	0.32503	0.0495357	0.00100934	COA1	protein_coding	cytochrome c oxidase assembly factor 1 homolog [Source:HGNC Symbol;Acc:HGNC:21868]
ENSG00000111799	0.814297	0.580686	5.42217e-05	0.00149037	COL12A1	protein_coding	collagen type XII alpha 1 chain [Source:HGNC Symbol;Acc:HGNC:2188]
ENSG00000169031	0.333358	0.362808	0.0465769	0.047788	COL4A3	protein_coding	collagen type IV alpha 3 chain [Source:HGNC Symbol;Acc:HGNC:2204]
ENSG00000172428	0.443785	0.43888	0.0028141	0.00603786	COPS9	protein_coding	COP9 signalosome subunit 9 [Source:HGNC Symbol;Acc:HGNC:21314]
ENSG00000132423	0.434961	0.274525	0.000706667	0.01809	COQ3	protein_coding	coenzyme Q3, methyltransferase [Source:HGNC Symbol;Acc:HGNC:18175]
ENSG00000196353	0.778836	0.892422	0.00505969	0.00478244	CPNE4	protein_coding	copine 4 [Source:HGNC Symbol;Acc:HGNC:2317]
ENSG00000196872	0.549588	0.410328	0.00184706	0.0168341	CRACDL	protein_coding	CRACD like [Source:HGNC Symbol;Acc:HGNC:33454]
ENSG00000137504	0.102084	0.225045	0.0365027	0.00128189	CREBZF	protein_coding	CREB/ATF bZIP transcription factor [Source:HGNC Symbol;Acc:HGNC:24905]
ENSG00000124207	0.1419	0.161036	0.0131969	0.012357	CSE1L	protein_coding	chromosome segregation 1 like [Source:HGNC Symbol;Acc:HGNC:2431]
ENSG00000225362	1.18477	0.938976	0.00241239	0.0156253	CT62	lncRNA	cancer/testis associated 62 [Source:HGNC Symbol;Acc:HGNC:27286]
ENSG00000171793	0.312036	0.146945	0.000475835	0.0472971	CTPS1	protein_coding	CTP synthase 1 [Source:HGNC Symbol;Acc:HGNC:2519]
ENSG00000155016	0.537107	0.210815	3.74509e-05	0.0213871	CYP2U1	protein_coding	cytochrome P450 family 2 subfamily U member 1 [Source:HGNC Symbol;Acc:HGNC:20582]
ENSG00000115866	0.13886	0.187129	0.0195929	0.00783107	DARS1	protein_coding	aspartyl-tRNA synthetase 1 [Source:HGNC Symbol;Acc:HGNC:2678]
ENSG00000179958	0.238794	0.323393	0.015353	0.00600709	DCTPP1	protein_coding	dCTP pyrophosphatase 1 [Source:HGNC Symbol;Acc:HGNC:28777]
ENSG00000165490	0.185719	0.271286	0.0377179	0.0106031	DDIAS	protein_coding	DNA damage induced apoptosis suppressor [Source:HGNC Symbol;Acc:HGNC:26351]
ENSG00000079785	0.13407	0.131712	0.0161821	0.0281035	DDX1	protein_coding	DEAD-box helicase 1 [Source:HGNC Symbol;Acc:HGNC:2734]
ENSG00000088205	0.190367	0.165598	0.00876255	0.0281316	DDX18	protein_coding	DEAD-box helicase 18 [Source:HGNC Symbol;Acc:HGNC:2741]
ENSG00000105339	0.410266	0.212879	0.000500629	0.0334481	DENND3	protein_coding	DENN domain containing 3 [Source:HGNC Symbol;Acc:HGNC:29134]
ENSG00000121644	0.260542	0.257238	0.00169212	0.00403344	DESI2	protein_coding	desumoylating isopeptidase 2 [Source:HGNC Symbol;Acc:HGNC:24264]
ENSG00000065357	0.475043	0.352957	0.000351414	0.00489928	DGKA	protein_coding	diacylglycerol kinase alpha [Source:HGNC Symbol;Acc:HGNC:2849]
ENSG00000153933	0.173843	0.172348	0.0164528	0.0273818	DGKE	protein_coding	diacylglycerol kinase epsilon [Source:HGNC Symbol;Acc:HGNC:2852]
ENSG00000237883	0.491429	0.646325	0.00240607	0.00121893	DGUOK-AS1	lncRNA	DGUOK antisense RNA 1 [Source:HGNC Symbol;Acc:HGNC:43441]
ENSG00000228716	0.127061	0.173084	0.0158367	0.00600709	DHFR	protein_coding	dihydrofolate reductase [Source:HGNC Symbol;Acc:HGNC:2861]
ENSG00000163214	0.200304	0.148959	0.00447228	0.0325008	DHX57	protein_coding	DExH-box helicase 57 [Source:HGNC Symbol;Acc:HGNC:20086]
ENSG00000147202	0.244734	0.211212	0.0124667	0.0387918	DIAPH2	protein_coding	diaphanous related formin 2 [Source:HGNC Symbol;Acc:HGNC:2877]
ENSG00000100206	0.289917	0.350225	0.0093677	0.00645929	DMC1	protein_coding	DNA meiotic recombinase 1 [Source:HGNC Symbol;Acc:HGNC:2927]
ENSG00000115137	0.231563	0.374824	0.0133592	0.00212028	DNAJC27	protein_coding	DnaJ heat shock protein family (Hsp40) member C27 [Source:HGNC Symbol;Acc:HGNC:30290]
ENSG00000130816	0.140343	0.176402	0.049126	0.0282046	DNMT1	protein_coding	DNA methyltransferase 1 [Source:HGNC Symbol;Acc:HGNC:2976]
ENSG00000171587	0.675028	0.401867	0.000636826	0.0215962	DSCAM	protein_coding	DS cell adhesion molecule [Source:HGNC Symbol;Acc:HGNC:3039]
ENSG00000235123	0.479904	0.507905	0.0097917	0.0129856	DSCAM-AS1	lncRNA	DSCAM antisense RNA 1 [Source:HGNC Symbol;Acc:HGNC:40197]
ENSG00000136982	0.343123	0.477366	0.00178828	0.00068114	DSCC1	protein_coding	DNA replication and sister chromatid cohesion 1 [Source:HGNC Symbol;Acc:HGNC:24453]
ENSG00000143476	0.247568	0.1738	0.00592692	0.0496471	DTL	protein_coding	denticleless E3 ubiquitin protein ligase homolog [Source:HGNC Symbol;Acc:HGNC:30288]
ENSG00000138101	0.275721	0.264165	0.00163431	0.00450696	DTNB	protein_coding	dystrobrevin beta [Source:HGNC Symbol;Acc:HGNC:3058]
ENSG00000101412	0.286034	0.169919	0.00115924	0.0330234	E2F1	protein_coding	E2F transcription factor 1 [Source:HGNC Symbol;Acc:HGNC:3113]
ENSG00000007968	0.37276	0.230603	0.000563496	0.0168314	E2F2	protein_coding	E2F transcription factor 2 [Source:HGNC Symbol;Acc:HGNC:3114]
ENSG00000112242	0.281744	0.188437	0.000622697	0.0127127	E2F3	protein_coding	E2F transcription factor 3 [Source:HGNC Symbol;Acc:HGNC:3115]
ENSG00000169016	0.353902	0.243842	0.0014944	0.0205623	E2F6	protein_coding	E2F transcription factor 6 [Source:HGNC Symbol;Acc:HGNC:3120]
ENSG00000165891	0.315216	0.363764	0.000245012	0.000318352	E2F7	protein_coding	E2F transcription factor 7 [Source:HGNC Symbol;Acc:HGNC:23820]
ENSG00000129173	0.219681	0.29481	0.00248591	0.00112474	E2F8	protein_coding	E2F transcription factor 8 [Source:HGNC Symbol;Acc:HGNC:24727]
ENSG00000107938	0.222202	0.160055	0.00159435	0.0178459	EDRF1	protein_coding	erythroid differentiation regulatory factor 1 [Source:HGNC Symbol;Acc:HGNC:24640]
ENSG00000074266	0.131222	0.158984	0.00909295	0.00619711	EED	protein_coding	embryonic ectoderm development [Source:HGNC Symbol;Acc:HGNC:3188]
ENSG00000101210	0.627865	0.236802	4.05511e-06	0.00548479	EEF1A2	protein_coding	eukaryotic translation elongation factor 1 alpha 2 [Source:HGNC Symbol;Acc:HGNC:3192]
ENSG00000055332	0.169818	0.185196	0.0178792	0.019566	EIF2AK2	protein_coding	eukaryotic translation initiation factor 2 alpha kinase 2 [Source:HGNC Symbol;Acc:HGNC:9437]
ENSG00000197977	0.855733	0.432945	1.53249e-05	0.0033417	ELOVL2	protein_coding	ELOVL fatty acid elongase 2 [Source:HGNC Symbol;Acc:HGNC:14416]
ENSG00000012660	0.299097	0.144131	0.000438262	0.0412569	ELOVL5	protein_coding	ELOVL fatty acid elongase 5 [Source:HGNC Symbol;Acc:HGNC:21308]
ENSG00000180385	0.214867	0.224919	0.0051851	0.00768526	EMC3-AS1	transcribed_unprocessed_pseudogene	EMC3 antisense RNA 1 [Source:HGNC Symbol;Acc:HGNC:49223]
ENSG00000126749	0.157734	0.162651	0.00808345	0.0124333	EMG1	protein_coding	EMG1 N1-specific pseudouridine methyltransferase [Source:HGNC Symbol;Acc:HGNC:16912]
ENSG00000185684	0.207183	0.236458	0.0230157	0.0200456	EP400P1	transcribed_unprocessed_pseudogene	EP400 pseudogene 1 [Source:HGNC Symbol;Acc:HGNC:26602]
ENSG00000088367	0.427838	0.325522	1.11731e-05	0.000260472	EPB41L1	protein_coding	erythrocyte membrane protein band 4.1 like 1 [Source:HGNC Symbol;Acc:HGNC:3378]
ENSG00000142627	0.309401	0.300933	0.0013635	0.00357319	EPHA2	protein_coding	EPH receptor A2 [Source:HGNC Symbol;Acc:HGNC:3386]
ENSG00000227070	0.748354	0.670402	0.00580504	0.0178117	EPS15-AS1	lncRNA	EPS15 antisense RNA 1 [Source:HGNC Symbol;Acc:HGNC:40219]
ENSG00000174371	0.358908	0.319315	0.00132323	0.00554697	EXO1	protein_coding	exonuclease 1 [Source:HGNC Symbol;Acc:HGNC:3511]
ENSG00000116903	0.23484	0.238678	0.00279343	0.00525643	EXOC8	protein_coding	exocyst complex component 8 [Source:HGNC Symbol;Acc:HGNC:24659]
ENSG00000130713	0.139005	0.126829	0.0113132	0.0283459	EXOSC2	protein_coding	exosome component 2 [Source:HGNC Symbol;Acc:HGNC:17097]
ENSG00000123737	0.167794	0.248133	0.0139902	0.00344302	EXOSC9	protein_coding	exosome component 9 [Source:HGNC Symbol;Acc:HGNC:9137]
ENSG00000106462	0.185366	0.256123	0.00482916	0.00177512	EZH2	protein_coding	enhancer of zeste 2 polycomb repressive complex 2 subunit [Source:HGNC Symbol;Acc:HGNC:3527]
ENSG00000131187	0.394451	0.365417	0.0227069	0.0469519	F12	protein_coding	coagulation factor XII [Source:HGNC Symbol;Acc:HGNC:3530]
ENSG00000189057	0.544516	0.292562	0.000156907	0.0135573	FAM111B	protein_coding	family with sequence similarity 111 member B [Source:HGNC Symbol;Acc:HGNC:24200]
ENSG00000197712	0.153767	0.313739	0.0238767	0.00115346	FAM114A1	protein_coding	family with sequence similarity 114 member A1 [Source:HGNC Symbol;Acc:HGNC:25087]
ENSG00000082269	1.00398	0.641101	0.00161545	0.0304434	FAM135A	protein_coding	family with sequence similarity 135 member A [Source:HGNC Symbol;Acc:HGNC:21084]
ENSG00000035141	0.164883	0.173807	0.00468484	0.00677387	FAM136A	protein_coding	family with sequence similarity 136 member A [Source:HGNC Symbol;Acc:HGNC:25911]
ENSG00000109794	0.334241	0.513758	0.0114701	0.00229711	FAM149A	protein_coding	family with sequence similarity 149 member A [Source:HGNC Symbol;Acc:HGNC:24527]
ENSG00000151553	0.292599	0.201292	0.000910547	0.0147279	FAM160B1	protein_coding	family with sequence similarity 160 member B1 [Source:HGNC Symbol;Acc:HGNC:29320]
ENSG00000157470	0.450074	0.4813	0.0375974	0.0420726	FAM81A	protein_coding	family with sequence similarity 81 member A [Source:HGNC Symbol;Acc:HGNC:28379]
ENSG00000116120	0.23585	0.169227	0.00515818	0.0417109	FARSB	protein_coding	phenylalanyl-tRNA synthetase subunit beta [Source:HGNC Symbol;Acc:HGNC:17800]
ENSG00000118246	0.180895	0.20372	0.0384154	0.0349774	FASTKD2	protein_coding	FAST kinase domains 2 [Source:HGNC Symbol;Acc:HGNC:29160]
ENSG00000118496	0.59179	0.356249	0.000219896	0.00979867	FBXO30	protein_coding	F-box protein 30 [Source:HGNC Symbol;Acc:HGNC:15600]
ENSG00000079459	0.147854	0.139157	0.00365424	0.0094288	FDFT1	protein_coding	farnesyl-diphosphate farnesyltransferase 1 [Source:HGNC Symbol;Acc:HGNC:3629]
ENSG00000066926	0.22081	0.389369	0.000636008	6.08459e-05	FECH	protein_coding	ferrochelatase [Source:HGNC Symbol;Acc:HGNC:3647]
ENSG00000168496	0.272707	0.18448	0.000765748	0.0140745	FEN1	protein_coding	flap structure-specific endonuclease 1 [Source:HGNC Symbol;Acc:HGNC:3650]
ENSG00000127418	0.265536	0.301258	0.0110817	0.0102937	FGFRL1	protein_coding	fibroblast growth factor receptor like 1 [Source:HGNC Symbol;Acc:HGNC:3693]
ENSG00000091483	0.103247	0.186922	0.0408665	0.00403857	FH	protein_coding	fumarate hydratase [Source:HGNC Symbol;Acc:HGNC:3700]
ENSG00000137460	0.547507	0.380499	0.000717827	0.0117382	FHDC1	protein_coding	FH2 domain containing 1 [Source:HGNC Symbol;Acc:HGNC:29363]
ENSG00000022267	0.615143	0.526546	9.15853e-05	0.000847286	FHL1	protein_coding	four and a half LIM domains 1 [Source:HGNC Symbol;Acc:HGNC:3702]
ENSG00000182263	0.476087	0.540979	0.00447596	0.00440877	FIGN	protein_coding	fidgetin, microtubule severing factor [Source:HGNC Symbol;Acc:HGNC:13285]
ENSG00000132436	0.220402	0.296379	0.00246114	0.00111328	FIGNL1	protein_coding	fidgetin like 1 [Source:HGNC Symbol;Acc:HGNC:13286]
ENSG00000134285	0.295294	0.240199	0.0102314	0.0420256	FKBP11	protein_coding	FKBP prolyl isomerase 11 [Source:HGNC Symbol;Acc:HGNC:18624]
ENSG00000004478	0.178898	0.104644	0.000744289	0.0261288	FKBP4	protein_coding	FKBP prolyl isomerase 4 [Source:HGNC Symbol;Acc:HGNC:3720]
ENSG00000122025	0.485848	0.63084	5.9861e-05	4.64667e-05	FLT3	protein_coding	fms related receptor tyrosine kinase 3 [Source:HGNC Symbol;Acc:HGNC:3765]
ENSG00000037280	1.01699	0.503722	2.97534e-05	0.00619221	FLT4	protein_coding	fms related receptor tyrosine kinase 4 [Source:HGNC Symbol;Acc:HGNC:3767]
ENSG00000075426	0.792193	0.356447	1.78033e-06	0.000877994	FOSL2	protein_coding	FOS like 2, AP-1 transcription factor subunit [Source:HGNC Symbol;Acc:HGNC:3798]
ENSG00000214336	0.725613	0.647043	0.00292167	0.0102376	FOXI3	protein_coding	forkhead box I3 [Source:HGNC Symbol;Acc:HGNC:35123]
ENSG00000070404	0.299217	0.2634	0.00317897	0.0118373	FSTL3	protein_coding	follistatin like 3 [Source:HGNC Symbol;Acc:HGNC:3973]
ENSG00000053108	0.893514	0.905867	0.012792	0.0199956	FSTL4	protein_coding	follistatin like 4 [Source:HGNC Symbol;Acc:HGNC:21389]
ENSG00000033327	0.498176	0.159846	3.10915e-05	0.0451641	GAB2	protein_coding	GRB2 associated binding protein 2 [Source:HGNC Symbol;Acc:HGNC:14458]
ENSG00000069482	0.548136	0.525937	0.00238871	0.0061411	GAL	protein_coding	galanin and GMAP prepropeptide [Source:HGNC Symbol;Acc:HGNC:4114]
ENSG00000054983	0.79101	0.38499	3.30198e-06	0.00121893	GALC	protein_coding	galactosylceramidase [Source:HGNC Symbol;Acc:HGNC:4115]
ENSG00000110328	0.36889	0.285759	0.00499898	0.02991	GALNT18	protein_coding	polypeptide N-acetylgalactosaminyltransferase 18 [Source:HGNC Symbol;Acc:HGNC:30488]
ENSG00000136574	2.21641	1.41925	3.07377e-06	0.000206898	GATA4	protein_coding	GATA binding protein 4 [Source:HGNC Symbol;Acc:HGNC:4173]
ENSG00000160766	0.277977	0.220835	0.00422656	0.0230758	GBAP1	transcribed_unprocessed_pseudogene	glucosylceramidase beta pseudogene 1 [Source:HGNC Symbol;Acc:HGNC:4178]
ENSG00000102886	0.205946	0.230885	0.0171612	0.0166121	GDPD3	protein_coding	glycerophosphodiester phosphodiesterase domain containing 3 [Source:HGNC Symbol;Acc:HGNC:28638]
ENSG00000178295	0.327444	0.349058	2.71173e-05	7.69899e-05	GEN1	protein_coding	GEN1 Holliday junction 5' flap endonuclease [Source:HGNC Symbol;Acc:HGNC:26881]
ENSG00000198380	0.207676	0.176308	0.00486908	0.0196387	GFPT1	protein_coding	glutamine--fructose-6-phosphate transaminase 1 [Source:HGNC Symbol;Acc:HGNC:4241]
ENSG00000115486	0.113662	0.191343	0.0143091	0.00183319	GGCX	protein_coding	gamma-glutamyl carboxylase [Source:HGNC Symbol;Acc:HGNC:4247]
ENSG00000100031	0.838145	0.798287	0.00867071	0.0188583	GGT1	protein_coding	gamma-glutamyltransferase 1 [Source:HGNC Symbol;Acc:HGNC:4250]
ENSG00000131153	0.218421	0.441449	0.00986516	0.000412632	GINS2	protein_coding	GINS complex subunit 2 [Source:HGNC Symbol;Acc:HGNC:24575]
ENSG00000181938	0.263453	0.194294	0.000165851	0.00286633	GINS3	protein_coding	GINS complex subunit 3 [Source:HGNC Symbol;Acc:HGNC:25851]
ENSG00000147536	0.282136	0.410123	0.000340729	0.000108859	GINS4	protein_coding	GINS complex subunit 4 [Source:HGNC Symbol;Acc:HGNC:28226]
ENSG00000102393	0.281048	0.167809	7.59804e-05	0.00478911	GLA	protein_coding	galactosidase alpha [Source:HGNC Symbol;Acc:HGNC:4296]
ENSG00000108010	0.243362	0.20244	0.00222129	0.0116542	GLRX3	protein_coding	glutaredoxin 3 [Source:HGNC Symbol;Acc:HGNC:15987]
ENSG00000183098	0.483048	0.285503	6.11522e-05	0.00432113	GPC6	protein_coding	glypican 6 [Source:HGNC Symbol;Acc:HGNC:4454]
ENSG00000140030	1.05523	0.974483	6.52579e-05	0.000377977	GPR65	protein_coding	G protein-coupled receptor 65 [Source:HGNC Symbol;Acc:HGNC:4517]
ENSG00000196208	1.02262	0.633687	2.04179e-06	0.000140956	GREB1	protein_coding	growth regulating estrogen receptor binding 1 [Source:HGNC Symbol;Acc:HGNC:24885]
ENSG00000141449	0.296422	0.184362	0.000242124	0.00901331	GREB1L	protein_coding	GREB1 like retinoic acid receptor coactivator [Source:HGNC Symbol;Acc:HGNC:31042]
ENSG00000134317	0.508034	0.39277	4.30203e-05	0.000817399	GRHL1	protein_coding	grainyhead like transcription factor 1 [Source:HGNC Symbol;Acc:HGNC:17923]
ENSG00000164284	0.291023	0.318618	0.0119563	0.0133328	GRPEL2	protein_coding	GrpE like 2, mitochondrial [Source:HGNC Symbol;Acc:HGNC:21060]
ENSG00000073605	0.44878	0.468484	0.0400926	0.0487407	GSDMB	protein_coding	gasdermin B [Source:HGNC Symbol;Acc:HGNC:23690]
ENSG00000065621	0.469038	0.284503	0.000458907	0.0157762	GSTO2	protein_coding	glutathione S-transferase omega 2 [Source:HGNC Symbol;Acc:HGNC:23064]
ENSG00000122034	0.188106	0.224839	0.0268386	0.0191941	GTF3A	protein_coding	general transcription factor IIIA [Source:HGNC Symbol;Acc:HGNC:4662]
ENSG00000137814	0.163506	0.191572	0.0339361	0.0261288	HAUS2	protein_coding	HAUS augmin like complex subunit 2 [Source:HGNC Symbol;Acc:HGNC:25530]
ENSG00000147874	0.331621	0.222374	0.000295889	0.00716957	HAUS6	protein_coding	HAUS augmin like complex subunit 6 [Source:HGNC Symbol;Acc:HGNC:25948]
ENSG00000119969	0.350639	0.195238	0.000505103	0.0247857	HELLS	protein_coding	helicase, lymphoid specific [Source:HGNC Symbol;Acc:HGNC:4861]
ENSG00000206503	0.523933	0.305585	0.00104304	0.0332805	HLA-A	protein_coding	major histocompatibility complex, class I, A [Source:HGNC Symbol;Acc:HGNC:4931]
ENSG00000168453	0.574559	0.456683	4.5853e-05	0.000749819	HR	protein_coding	HR lysine demethylase and nuclear receptor corepressor [Source:HGNC Symbol;Acc:HGNC:5172]
ENSG00000025423	0.403304	0.451757	0.00159435	0.00201669	HSD17B6	protein_coding	hydroxysteroid 17-beta dehydrogenase 6 [Source:HGNC Symbol;Acc:HGNC:23316]
ENSG00000164070	0.199614	0.20281	0.0150873	0.0227182	HSPA4L	protein_coding	heat shock protein family A (Hsp70) member 4 like [Source:HGNC Symbol;Acc:HGNC:17041]
ENSG00000148057	0.386833	0.386804	0.0189193	0.0300651	IDNK	protein_coding	IDNK gluconokinase [Source:HGNC Symbol;Acc:HGNC:31367]
ENSG00000214706	0.252807	0.100113	9.6303e-05	0.037717	IFRD2	protein_coding	interferon related developmental regulator 2 [Source:HGNC Symbol;Acc:HGNC:5457]
ENSG00000211891	1.47224	1.12618	5.42326e-05	0.00104894	IGHE	IG_C_gene	immunoglobulin heavy constant epsilon [Source:HGNC Symbol;Acc:HGNC:5522]
ENSG00000263528	0.405257	0.484793	0.0240627	0.0170605	IKBKE	protein_coding	inhibitor of nuclear factor kappa B kinase subunit epsilon [Source:HGNC Symbol;Acc:HGNC:14552]
ENSG00000056736	0.359154	0.217083	3.65114e-05	0.00255757	IL17RB	protein_coding	interleukin 17 receptor B [Source:HGNC Symbol;Acc:HGNC:18015]
ENSG00000132305	0.190281	0.171956	0.00255103	0.00870195	IMMT	protein_coding	inner membrane mitochondrial protein [Source:HGNC Symbol;Acc:HGNC:6047]
ENSG00000136718	0.273539	0.150533	0.000102014	0.00888011	IMP4	protein_coding	IMP U3 small nucleolar ribonucleoprotein 4 [Source:HGNC Symbol;Acc:HGNC:30856]
ENSG00000114933	0.21473	0.174155	0.00746742	0.0335606	INO80D	protein_coding	INO80 complex subunit D [Source:HGNC Symbol;Acc:HGNC:25997]
ENSG00000186480	0.153045	0.142735	0.0107971	0.0247933	INSIG1	protein_coding	insulin induced gene 1 [Source:HGNC Symbol;Acc:HGNC:6083]
ENSG00000064102	0.216784	0.139936	0.00351423	0.0478925	INTS13	protein_coding	integrator complex subunit 13 [Source:HGNC Symbol;Acc:HGNC:20174]
ENSG00000143493	0.213353	0.158599	0.00607378	0.0408798	INTS7	protein_coding	integrator complex subunit 7 [Source:HGNC Symbol;Acc:HGNC:24484]
ENSG00000164066	0.909938	0.542834	0.000823178	0.0258222	INTU	protein_coding	inturned planar cell polarity protein [Source:HGNC Symbol;Acc:HGNC:29239]
ENSG00000086200	0.144758	0.114254	0.0107087	0.0485618	IPO11	protein_coding	importin 11 [Source:HGNC Symbol;Acc:HGNC:20628]
ENSG00000065150	0.122463	0.181819	0.0351401	0.0091206	IPO5	protein_coding	importin 5 [Source:HGNC Symbol;Acc:HGNC:6402]
ENSG00000173226	0.237636	0.194207	0.0013715	0.00872252	IQCB1	protein_coding	IQ motif containing B1 [Source:HGNC Symbol;Acc:HGNC:28949]
ENSG00000161638	0.523297	0.424381	0.000569266	0.00451068	ITGA5	protein_coding	integrin subunit alpha 5 [Source:HGNC Symbol;Acc:HGNC:6141]
ENSG00000119185	0.113758	0.220965	0.0469543	0.00332082	ITGB1BP1	protein_coding	integrin subunit beta 1 binding protein 1 [Source:HGNC Symbol;Acc:HGNC:23927]
ENSG00000163166	0.267964	0.204289	0.0023838	0.0182739	IWS1	protein_coding	interacts with SUPT6H, CTD assembly factor 1 [Source:HGNC Symbol;Acc:HGNC:25467]
ENSG00000102221	0.184709	0.153895	0.0116426	0.0422097	JADE3	protein_coding	jade family PHD finger 3 [Source:HGNC Symbol;Acc:HGNC:22982]
ENSG00000107104	0.409132	0.200554	0.000560974	0.0446522	KANK1	protein_coding	KN motif and ankyrin repeat domains 1 [Source:HGNC Symbol;Acc:HGNC:19309]
ENSG00000176407	0.159888	0.213833	0.00544325	0.00229247	KCMF1	protein_coding	potassium channel modulatory factor 1 [Source:HGNC Symbol;Acc:HGNC:20589]
ENSG00000143473	2.88215	1.4377	2.68185e-05	0.00534672	KCNH1	protein_coding	potassium voltage-gated channel subfamily H member 1 [Source:HGNC Symbol;Acc:HGNC:6250]
ENSG00000104783	0.897491	0.985968	0.0125937	0.0135993	KCNN4	protein_coding	potassium calcium-activated channel subfamily N member 4 [Source:HGNC Symbol;Acc:HGNC:6293]
ENSG00000269821	0.660147	0.618877	0.000147709	0.000749819	KCNQ1OT1	lncRNA	KCNQ1 opposite strand/antisense transcript 1 [Source:HGNC Symbol;Acc:HGNC:6295]
ENSG00000185760	1.36814	0.60778	2.9652e-05	0.0101815	KCNQ5	protein_coding	potassium voltage-gated channel subfamily Q member 5 [Source:HGNC Symbol;Acc:HGNC:6299]
ENSG00000100196	0.323207	0.340236	0.0228604	0.0281742	KDELR3	protein_coding	KDEL endoplasmic reticulum protein retention receptor 3 [Source:HGNC Symbol;Acc:HGNC:6306]
ENSG00000119537	0.25353	0.233356	0.00447596	0.0126762	KDSR	protein_coding	3-ketodihydrosphingosine reductase [Source:HGNC Symbol;Acc:HGNC:4021]
ENSG00000132680	0.237859	0.390168	0.00168566	0.000223991	KHDC4	protein_coding	KH domain containing 4, pre-mRNA splicing factor [Source:HGNC Symbol;Acc:HGNC:29145]
ENSG00000138030	0.463982	0.337109	0.000276801	0.00455417	KHK	protein_coding	ketohexokinase [Source:HGNC Symbol;Acc:HGNC:6315]
ENSG00000235750	0.532694	0.216567	0.000144033	0.0424614	KIAA0040	protein_coding	KIAA0040 [Source:HGNC Symbol;Acc:HGNC:28950]
ENSG00000130294	0.259226	0.264282	0.0311343	0.0430637	KIF1A	protein_coding	kinesin family member 1A [Source:HGNC Symbol;Acc:HGNC:888]
ENSG00000186638	0.239333	0.304942	0.00570494	0.00305353	KIF24	protein_coding	kinesin family member 24 [Source:HGNC Symbol;Acc:HGNC:19916]
ENSG00000084731	0.57132	0.371943	4.6812e-05	0.0022115	KIF3C	protein_coding	kinesin family member 3C [Source:HGNC Symbol;Acc:HGNC:6321]
ENSG00000003096	0.37631	0.363537	0.0110178	0.021554	KLHL13	protein_coding	kelch like family member 13 [Source:HGNC Symbol;Acc:HGNC:22931]
ENSG00000102753	0.196068	0.182543	0.0114357	0.0262061	KPNA3	protein_coding	karyopherin subunit alpha 3 [Source:HGNC Symbol;Acc:HGNC:6396]
ENSG00000171401	2.49546	1.12734	3.99353e-05	0.011959	KRT13	protein_coding	keratin 13 [Source:HGNC Symbol;Acc:HGNC:6415]
ENSG00000087299	0.126681	0.131599	0.0110605	0.0158039	L2HGDH	protein_coding	L-2-hydroxyglutarate dehydrogenase [Source:HGNC Symbol;Acc:HGNC:20499]
ENSG00000196878	0.793567	0.521614	0.000532491	0.0122979	LAMB3	protein_coding	laminin subunit beta 3 [Source:HGNC Symbol;Acc:HGNC:6490]
ENSG00000068697	0.210634	0.195493	0.00585492	0.0153413	LAPTM4A	protein_coding	lysosomal protein transmembrane 4 alpha [Source:HGNC Symbol;Acc:HGNC:6924]
ENSG00000118961	0.113667	0.199266	0.0454839	0.00545212	LDAH	protein_coding	lipid droplet associated hydrolase [Source:HGNC Symbol;Acc:HGNC:26145]
ENSG00000134333	0.29527	0.212438	0.000306786	0.00525643	LDHA	protein_coding	lactate dehydrogenase A [Source:HGNC Symbol;Acc:HGNC:6535]
ENSG00000119862	0.202295	0.172216	0.0066338	0.02478	LGALSL	protein_coding	galectin like [Source:HGNC Symbol;Acc:HGNC:25012]
ENSG00000121454	0.503589	0.698907	0.00111952	0.000420574	LHX4	protein_coding	LIM homeobox 4 [Source:HGNC Symbol;Acc:HGNC:21734]
ENSG00000259527	0.84083	1.01312	0.00711715	0.00514548	LINC00052	lncRNA	long intergenic non-protein coding RNA 52 [Source:HGNC Symbol;Acc:HGNC:26455]
ENSG00000249346	1.25891	0.662575	0.000476741	0.0304645	LINC01016	lncRNA	long intergenic non-protein coding RNA 1016 [Source:HGNC Symbol;Acc:HGNC:48991]
ENSG00000224559	0.28611	0.321114	0.0438009	0.0402848	LINC01087	lncRNA	long intergenic non-protein coding RNA 1087 [Source:HGNC Symbol;Acc:HGNC:49144]
ENSG00000237638	0.408228	0.510016	0.00063312	0.000473601	LINC02245	lncRNA	long intergenic non-protein coding RNA 2245 [Source:HGNC Symbol;Acc:HGNC:53134]
ENSG00000074695	0.146504	0.188863	0.0247593	0.0125008	LMAN1	protein_coding	lectin, mannose binding 1 [Source:HGNC Symbol;Acc:HGNC:6631]
ENSG00000105983	0.189244	0.149187	0.00183358	0.0131087	LMBR1	protein_coding	limb development membrane protein 1 [Source:HGNC Symbol;Acc:HGNC:13243]
ENSG00000129038	0.42434	0.396803	0.0217892	0.0438952	LOXL1	protein_coding	lysyl oxidase like 1 [Source:HGNC Symbol;Acc:HGNC:6665]
ENSG00000153395	0.176032	0.144537	0.00420324	0.0200327	LPCAT1	protein_coding	lysophosphatidylcholine acyltransferase 1 [Source:HGNC Symbol;Acc:HGNC:25718]
ENSG00000134324	0.376062	0.229416	0.000673282	0.0203004	LPIN1	protein_coding	lipin 1 [Source:HGNC Symbol;Acc:HGNC:13345]
ENSG00000138095	0.145221	0.154433	0.0444704	0.0497579	LRPPRC	protein_coding	leucine rich pentatricopeptide repeat containing [Source:HGNC Symbol;Acc:HGNC:15714]
ENSG00000137821	1.32483	0.756604	0.00152226	0.0454492	LRRC49	protein_coding	leucine rich repeat containing 49 [Source:HGNC Symbol;Acc:HGNC:25965]
ENSG00000145220	0.262518	0.155232	0.00185984	0.0451498	LYAR	protein_coding	Ly1 antibody reactive [Source:HGNC Symbol;Acc:HGNC:26021]
ENSG00000150551	0.703078	0.414885	0.000997438	0.0307126	LYPD1	protein_coding	LY6/PLAUR domain containing 1 [Source:HGNC Symbol;Acc:HGNC:28431]
ENSG00000187123	0.523696	0.390357	0.000760803	0.00873731	LYPD6	protein_coding	LY6/PLAUR domain containing 6 [Source:HGNC Symbol;Acc:HGNC:28751]
ENSG00000150556	0.292111	0.549002	0.03503	0.00279047	LYPD6B	protein_coding	LY6/PLAUR domain containing 6B [Source:HGNC Symbol;Acc:HGNC:27018]
ENSG00000197063	0.295163	0.252834	0.000275292	0.00200226	MAFG	protein_coding	MAF bZIP transcription factor G [Source:HGNC Symbol;Acc:HGNC:6781]
ENSG00000179222	0.963462	0.529883	2.62771e-06	0.000434188	MAGED1	protein_coding	MAGE family member D1 [Source:HGNC Symbol;Acc:HGNC:6813]
ENSG00000011566	0.13445	0.167822	0.00899397	0.00533423	MAP4K3	protein_coding	mitogen-activated protein kinase kinase kinase kinase 3 [Source:HGNC Symbol;Acc:HGNC:6865]
ENSG00000116141	0.372297	0.514208	0.00836235	0.00291216	MARK1	protein_coding	microtubule affinity regulating kinase 1 [Source:HGNC Symbol;Acc:HGNC:6896]
ENSG00000120539	0.296839	0.27175	0.000928792	0.00360445	MASTL	protein_coding	microtubule associated serine/threonine kinase like [Source:HGNC Symbol;Acc:HGNC:19042]
ENSG00000132031	0.397589	0.652902	3.10915e-05	4.82857e-06	MATN3	protein_coding	matrilin 3 [Source:HGNC Symbol;Acc:HGNC:6909]
ENSG00000015479	0.637559	1.10733	0.000245012	2.78081e-05	MATR3	protein_coding	matrin 3 [Source:HGNC Symbol;Acc:HGNC:6912]
ENSG00000134046	0.266485	0.162898	0.000422801	0.0145127	MBD2	protein_coding	methyl-CpG binding domain protein 2 [Source:HGNC Symbol;Acc:HGNC:6917]
ENSG00000139793	0.326955	0.468697	0.000668415	0.000217007	MBNL2	protein_coding	muscleblind like splicing regulator 2 [Source:HGNC Symbol;Acc:HGNC:16746]
ENSG00000065328	0.397084	0.331681	5.75627e-05	0.000652165	MCM10	protein_coding	minichromosome maintenance 10 replication initiation factor [Source:HGNC Symbol;Acc:HGNC:18043]
ENSG00000073111	0.249208	0.18646	0.00132464	0.0130829	MCM2	protein_coding	minichromosome maintenance complex component 2 [Source:HGNC Symbol;Acc:HGNC:6944]
ENSG00000112118	0.135287	0.115353	0.00765541	0.0275823	MCM3	protein_coding	minichromosome maintenance complex component 3 [Source:HGNC Symbol;Acc:HGNC:6945]
ENSG00000104738	0.20858	0.192364	0.000726105	0.0028622	MCM4	protein_coding	minichromosome maintenance complex component 4 [Source:HGNC Symbol;Acc:HGNC:6947]
ENSG00000100297	0.170447	0.197218	0.0111772	0.00944595	MCM5	protein_coding	minichromosome maintenance complex component 5 [Source:HGNC Symbol;Acc:HGNC:6948]
ENSG00000076003	0.358237	0.280637	5.95381e-05	0.000975336	MCM6	protein_coding	minichromosome maintenance complex component 6 [Source:HGNC Symbol;Acc:HGNC:6949]
ENSG00000111554	0.162992	0.226543	0.0181113	0.00619711	MDM1	protein_coding	Mdm1 nuclear protein [Source:HGNC Symbol;Acc:HGNC:29917]
ENSG00000065833	0.186189	0.233446	0.00867696	0.00503512	ME1	protein_coding	malic enzyme 1 [Source:HGNC Symbol;Acc:HGNC:6983]
ENSG00000125871	0.167038	0.157534	0.00207531	0.00600709	MGME1	protein_coding	mitochondrial genome maintenance exonuclease 1 [Source:HGNC Symbol;Acc:HGNC:16205]
ENSG00000111341	1.816	0.545542	1.34196e-06	0.00514636	MGP	protein_coding	matrix Gla protein [Source:HGNC Symbol;Acc:HGNC:7060]
ENSG00000143198	0.322479	0.238578	0.00273136	0.0230209	MGST3	protein_coding	microsomal glutathione S-transferase 3 [Source:HGNC Symbol;Acc:HGNC:7064]
ENSG00000168404	0.92443	0.506056	5.9861e-05	0.0062005	MLKL	protein_coding	mixed lineage kinase domain like pseudokinase [Source:HGNC Symbol;Acc:HGNC:26617]
ENSG00000198598	0.562699	0.285019	4.7856e-05	0.00792205	MMP17	protein_coding	matrix metallopeptidase 17 [Source:HGNC Symbol;Acc:HGNC:7163]
ENSG00000146263	0.161086	0.18407	0.0402818	0.034482	MMS22L	protein_coding	MMS22 like, DNA repair protein [Source:HGNC Symbol;Acc:HGNC:21475]
ENSG00000075643	0.68421	0.622615	0.000850836	0.00344944	MOCOS	protein_coding	molybdenum cofactor sulfurase [Source:HGNC Symbol;Acc:HGNC:18234]
ENSG00000118242	0.365195	0.3065	0.00652767	0.0260031	MREG	protein_coding	melanoregulin [Source:HGNC Symbol;Acc:HGNC:25478]
ENSG00000158042	0.136053	0.172801	0.0367637	0.0199956	MRPL17	protein_coding	mitochondrial ribosomal protein L17 [Source:HGNC Symbol;Acc:HGNC:14053]
ENSG00000115364	0.196841	0.161042	0.00418295	0.020248	MRPL19	protein_coding	mitochondrial ribosomal protein L19 [Source:HGNC Symbol;Acc:HGNC:14052]
ENSG00000185414	0.120666	0.246187	0.037838	0.00201669	MRPL30	protein_coding	mitochondrial ribosomal protein L30 [Source:HGNC Symbol;Acc:HGNC:14036]
ENSG00000204316	0.356626	0.537883	0.0403953	0.00979875	MRPL38	protein_coding	mitochondrial ribosomal protein L38 [Source:HGNC Symbol;Acc:HGNC:14033]
ENSG00000144029	0.150432	0.156045	0.0182576	0.0247298	MRPS5	protein_coding	mitochondrial ribosomal protein S5 [Source:HGNC Symbol;Acc:HGNC:14498]
ENSG00000243927	0.158605	0.128558	0.0123506	0.0487288	MRPS6	protein_coding	mitochondrial ribosomal protein S6 [Source:HGNC Symbol;Acc:HGNC:14051]
ENSG00000135972	0.221029	0.224418	0.00345257	0.00620964	MRPS9	protein_coding	mitochondrial ribosomal protein S9 [Source:HGNC Symbol;Acc:HGNC:14501]
ENSG00000066697	0.3421	0.278397	0.00876255	0.0373232	MSANTD3	protein_coding	Myb/SANT DNA binding domain containing 3 [Source:HGNC Symbol;Acc:HGNC:23370]
ENSG00000095002	0.252088	0.337937	0.000491893	0.000236053	MSH2	protein_coding	mutS homolog 2 [Source:HGNC Symbol;Acc:HGNC:7325]
ENSG00000116062	0.309425	0.243863	0.000136406	0.00178938	MSH6	protein_coding	mutS homolog 6 [Source:HGNC Symbol;Acc:HGNC:7329]
ENSG00000198736	0.153923	0.167659	0.00960295	0.0109937	MSRB1	protein_coding	methionine sulfoxide reductase B1 [Source:HGNC Symbol;Acc:HGNC:14133]
ENSG00000172167	0.354138	0.461078	0.00132323	0.000755177	MTBP	protein_coding	MDM2 binding protein [Source:HGNC Symbol;Acc:HGNC:7417]
ENSG00000065911	0.118052	0.290017	0.00628665	7.69899e-05	MTHFD2	protein_coding	methylenetetrahydrofolate dehydrogenase (NADP+ dependent) 2, methenyltetrahydrofolate cyclohydrolase [Source:HGNC Symbol;Acc:HGNC:7434]
ENSG00000085760	0.125087	0.157686	0.0164977	0.00910225	MTIF2	protein_coding	mitochondrial translational initiation factor 2 [Source:HGNC Symbol;Acc:HGNC:7441]
ENSG00000242086	0.147313	0.225163	0.031109	0.0069481	MUC20-OT1	lncRNA	MUC20 overlapping transcript [Source:HGNC Symbol;Acc:HGNC:53807]
ENSG00000117983	1.5469	0.986866	6.352e-05	0.00297076	MUC5B	protein_coding	mucin 5B, oligomeric mucus/gel-forming [Source:HGNC Symbol;Acc:HGNC:7516]
ENSG00000118513	0.481671	0.334579	0.000851079	0.0134684	MYB	protein_coding	MYB proto-oncogene, transcription factor [Source:HGNC Symbol;Acc:HGNC:7545]
ENSG00000185697	0.498262	0.595762	0.000103804	0.00012292	MYBL1	protein_coding	MYB proto-oncogene like 1 [Source:HGNC Symbol;Acc:HGNC:7547]
ENSG00000101057	0.204813	0.171748	0.00172334	0.00915344	MYBL2	protein_coding	MYB proto-oncogene like 2 [Source:HGNC Symbol;Acc:HGNC:7548]
ENSG00000278259	0.177882	0.156157	0.00423058	0.0149977	MYO19	protein_coding	myosin XIX [Source:HGNC Symbol;Acc:HGNC:26234]
ENSG00000102030	0.213712	0.316494	0.0144282	0.0035291	NAA10	protein_coding	N-alpha-acetyltransferase 10, NatA catalytic subunit [Source:HGNC Symbol;Acc:HGNC:18704]
ENSG00000177694	1.23705	0.539214	8.70969e-06	0.00458223	NAALADL2	protein_coding	N-acetylated alpha-linked acidic dipeptidase like 2 [Source:HGNC Symbol;Acc:HGNC:23219]
ENSG00000161048	0.22456	0.26422	0.0210308	0.0160407	NAPEPLD	protein_coding	N-acyl phosphatidylethanolamine phospholipase D [Source:HGNC Symbol;Acc:HGNC:21683]
ENSG00000134440	0.14148	0.254241	0.02703	0.00260384	NARS1	protein_coding	asparaginyl-tRNA synthetase 1 [Source:HGNC Symbol;Acc:HGNC:7643]
ENSG00000132780	0.119157	0.113155	0.0202974	0.0393114	NASP	protein_coding	nuclear autoantigenic sperm protein [Source:HGNC Symbol;Acc:HGNC:7644]
ENSG00000136937	0.095189	0.106424	0.0311496	0.0296414	NCBP1	protein_coding	nuclear cap binding protein subunit 1 [Source:HGNC Symbol;Acc:HGNC:7658]
ENSG00000107130	0.350557	0.107185	2.21311e-05	0.043847	NCS1	protein_coding	neuronal calcium sensor 1 [Source:HGNC Symbol;Acc:HGNC:3953]
ENSG00000154328	0.411789	0.178034	0.000255171	0.0464979	NEIL2	protein_coding	nei like DNA glycosylase 2 [Source:HGNC Symbol;Acc:HGNC:18956]
ENSG00000155438	0.21425	0.238377	0.0216765	0.0209803	NIFK	protein_coding	nucleolar protein interacting with the FHA domain of MKI67 [Source:HGNC Symbol;Acc:HGNC:17838]
ENSG00000197696	0.255639	0.26153	0.0086797	0.0135993	NMB	protein_coding	neuromedin B [Source:HGNC Symbol;Acc:HGNC:7842]
ENSG00000239672	0.20976	0.253013	0.0198464	0.0135855	NME1	protein_coding	NME/NM23 nucleoside diphosphate kinase 1 [Source:HGNC Symbol;Acc:HGNC:7849]
ENSG00000115761	0.185863	0.147429	0.00739976	0.0365344	NOL10	protein_coding	nucleolar protein 10 [Source:HGNC Symbol;Acc:HGNC:25862]
ENSG00000146909	0.228125	0.142301	0.00146268	0.0312579	NOM1	protein_coding	nucleolar protein with MIF4G domain 1 [Source:HGNC Symbol;Acc:HGNC:13244]
ENSG00000101361	0.3023	0.157923	8.15587e-05	0.00967364	NOP56	protein_coding	NOP56 ribonucleoprotein [Source:HGNC Symbol;Acc:HGNC:15911]
ENSG00000135838	1.27098	0.572129	0.000216735	0.0362232	NPL	protein_coding	N-acetylneuraminate pyruvate lyase [Source:HGNC Symbol;Acc:HGNC:16781]
ENSG00000107833	0.406381	0.318827	0.00439359	0.0252293	NPM3	protein_coding	nucleophosmin/nucleoplasmin 3 [Source:HGNC Symbol;Acc:HGNC:7931]
ENSG00000124588	0.132096	0.165581	0.041028	0.0234864	NQO2	protein_coding	N-ribosyldihydronicotinamide:quinone reductase 2 [Source:HGNC Symbol;Acc:HGNC:7856]
ENSG00000091129	0.29609	0.22465	0.000529813	0.00600709	NRCAM	protein_coding	neuronal cell adhesion molecule [Source:HGNC Symbol;Acc:HGNC:7994]
ENSG00000148335	0.220764	0.143463	0.000573588	0.0135993	NTMT1	protein_coding	N-terminal Xaa-Pro-Lys N-methyltransferase 1 [Source:HGNC Symbol;Acc:HGNC:23373]
ENSG00000065320	0.669933	0.687084	1.86115e-05	7.35148e-05	NTN1	protein_coding	netrin 1 [Source:HGNC Symbol;Acc:HGNC:8029]
ENSG00000165609	0.116148	0.182506	0.0140701	0.00255757	NUDT5	protein_coding	nudix hydrolase 5 [Source:HGNC Symbol;Acc:HGNC:8052]
ENSG00000113569	0.145336	0.194349	0.00828335	0.00343056	NUP155	protein_coding	nucleoporin 155 [Source:HGNC Symbol;Acc:HGNC:8063]
ENSG00000143748	0.149984	0.126454	0.0130532	0.0439882	NVL	protein_coding	nuclear VCP like [Source:HGNC Symbol;Acc:HGNC:8070]
ENSG00000152193	0.251668	0.243287	0.0261084	0.0451641	OBI1	protein_coding	ORC ubiquitin ligase 1 [Source:HGNC Symbol;Acc:HGNC:20308]
ENSG00000115758	0.445917	0.229452	1.26685e-05	0.00270574	ODC1	protein_coding	ornithine decarboxylase 1 [Source:HGNC Symbol;Acc:HGNC:8109]
ENSG00000119900	0.203034	0.135559	0.00127074	0.0209854	OGFRL1	protein_coding	opioid growth factor receptor like 1 [Source:HGNC Symbol;Acc:HGNC:21378]
ENSG00000054277	0.329871	0.401359	0.00145333	0.00120153	OPN3	protein_coding	opsin 3 [Source:HGNC Symbol;Acc:HGNC:14007]
ENSG00000085840	0.339351	0.257954	0.00565949	0.035371	ORC1	protein_coding	origin recognition complex subunit 1 [Source:HGNC Symbol;Acc:HGNC:8487]
ENSG00000079156	0.381431	0.557197	0.000475835	0.000140956	OSBPL6	protein_coding	oxysterol binding protein like 6 [Source:HGNC Symbol;Acc:HGNC:16388]
ENSG00000117859	0.361366	0.163673	3.03391e-05	0.00962119	OSBPL9	protein_coding	oxysterol binding protein like 9 [Source:HGNC Symbol;Acc:HGNC:16386]
ENSG00000164920	0.157496	0.219321	0.0409685	0.0148628	OSR2	protein_coding	odd-skipped related transciption factor 2 [Source:HGNC Symbol;Acc:HGNC:15830]
ENSG00000128050	0.143449	0.112628	0.00767472	0.0392	PAICS	protein_coding	phosphoribosylaminoimidazole carboxylase and phosphoribosylaminoimidazolesuccinocarboxamide synthase [Source:HGNC Symbol;Acc:HGNC:8587]
ENSG00000145730	0.566317	0.316764	9.93584e-06	0.00143257	PAM	protein_coding	peptidylglycine alpha-amidating monooxygenase [Source:HGNC Symbol;Acc:HGNC:8596]
ENSG00000217930	0.269644	0.30117	0.0191108	0.0186268	PAM16	protein_coding	presequence translocase associated motor 16 [Source:HGNC Symbol;Acc:HGNC:29679]
ENSG00000261485	0.693637	0.585339	0.00477994	0.0199329	PAN3-AS1	lncRNA	PAN3 antisense RNA 1 [Source:HGNC Symbol;Acc:HGNC:39932]
ENSG00000162073	0.18693	0.160154	0.00726565	0.0259021	PAQR4	protein_coding	progestin and adipoQ receptor family member 4 [Source:HGNC Symbol;Acc:HGNC:26386]
ENSG00000165194	1.37901	0.527033	2.9652e-05	0.0205974	PCDH19	protein_coding	protocadherin 19 [Source:HGNC Symbol;Acc:HGNC:14270]
ENSG00000143870	0.118613	0.109449	0.017462	0.0391247	PDIA6	protein_coding	protein disulfide isomerase family A member 6 [Source:HGNC Symbol;Acc:HGNC:30168]
ENSG00000107438	0.533929	0.190763	5.28965e-06	0.00874347	PDLIM1	protein_coding	PDZ and LIM domain 1 [Source:HGNC Symbol;Acc:HGNC:2067]
ENSG00000174827	1.71482	0.74918	0.000108925	0.0267668	PDZK1	protein_coding	PDZ domain containing 1 [Source:HGNC Symbol;Acc:HGNC:8821]
ENSG00000162734	0.17229	0.101877	0.00115587	0.0335606	PEA15	protein_coding	proliferation and apoptosis adaptor protein 15 [Source:HGNC Symbol;Acc:HGNC:8822]
ENSG00000242265	0.530406	0.218583	9.6303e-05	0.0321137	PEG10	protein_coding	paternally expressed 10 [Source:HGNC Symbol;Acc:HGNC:14005]
ENSG00000112378	0.169531	0.172492	0.0105922	0.0166572	PERP	protein_coding	p53 apoptosis effector related to PMP22 [Source:HGNC Symbol;Acc:HGNC:17637]
ENSG00000166821	0.186067	0.157977	0.00862654	0.0309545	PEX11A	protein_coding	peroxisomal biogenesis factor 11 alpha [Source:HGNC Symbol;Acc:HGNC:8852]
ENSG00000181649	0.416074	0.717233	0.0344034	0.00428334	PHLDA2	protein_coding	pleckstrin homology like domain family A member 2 [Source:HGNC Symbol;Acc:HGNC:12385]
ENSG00000139144	0.964247	0.69231	5.28965e-06	0.000193433	PIK3C2G	protein_coding	phosphatidylinositol-4-phosphate 3-kinase catalytic subunit type 2 gamma [Source:HGNC Symbol;Acc:HGNC:8973]
ENSG00000141506	0.904201	0.548822	0.00018047	0.00821461	PIK3R5	protein_coding	phosphoinositide-3-kinase regulatory subunit 5 [Source:HGNC Symbol;Acc:HGNC:30035]
ENSG00000150867	0.104917	0.135535	0.0220255	0.0106913	PIP4K2A	protein_coding	phosphatidylinositol-5-phosphate 4-kinase type 2 alpha [Source:HGNC Symbol;Acc:HGNC:8997]
ENSG00000135549	1.14744	0.78393	1.64448e-05	0.000742241	PKIB	protein_coding	cAMP-dependent protein kinase inhibitor beta [Source:HGNC Symbol;Acc:HGNC:9018]
ENSG00000067225	0.106418	0.0873031	0.0106828	0.0420256	PKM	protein_coding	pyruvate kinase M1/2 [Source:HGNC Symbol;Acc:HGNC:9021]
ENSG00000214456	0.697398	0.650454	0.00203283	0.00619711	PLIN5	protein_coding	perilipin 5 [Source:HGNC Symbol;Acc:HGNC:33196]
ENSG00000152952	0.173536	0.181231	0.0079149	0.0113959	PLOD2	protein_coding	procollagen-lysine,2-oxoglutarate 5-dioxygenase 2 [Source:HGNC Symbol;Acc:HGNC:9082]
ENSG00000120756	0.15504	0.173291	0.0267216	0.0255175	PLS1	protein_coding	plastin 1 [Source:HGNC Symbol;Acc:HGNC:9090]
ENSG00000115946	0.223003	0.363088	0.0107971	0.00163581	PNO1	protein_coding	partner of NOB1 homolog [Source:HGNC Symbol;Acc:HGNC:32790]
ENSG00000138035	0.338377	0.351347	0.000480512	0.00111328	PNPT1	protein_coding	polyribonucleotide nucleotidyltransferase 1 [Source:HGNC Symbol;Acc:HGNC:23166]
ENSG00000124429	0.0992495	0.212082	0.0410987	0.00176997	POF1B	protein_coding	POF1B actin binding protein [Source:HGNC Symbol;Acc:HGNC:13711]
ENSG00000101868	0.128637	0.176664	0.0354753	0.0135601	POLA1	protein_coding	DNA polymerase alpha 1, catalytic subunit [Source:HGNC Symbol;Acc:HGNC:9173]
ENSG00000014138	0.361837	0.46663	0.00063312	0.000377977	POLA2	protein_coding	DNA polymerase alpha 2, accessory subunit [Source:HGNC Symbol;Acc:HGNC:30073]
ENSG00000106628	0.139823	0.0970064	0.00559461	0.0496471	POLD2	protein_coding	DNA polymerase delta 2, accessory subunit [Source:HGNC Symbol;Acc:HGNC:9176]
ENSG00000077514	0.205723	0.140667	0.00391363	0.041213	POLD3	protein_coding	DNA polymerase delta 3, accessory subunit [Source:HGNC Symbol;Acc:HGNC:20932]
ENSG00000051341	0.290242	0.370544	0.0066338	0.00350599	POLQ	protein_coding	DNA polymerase theta [Source:HGNC Symbol;Acc:HGNC:9186]
ENSG00000144231	0.202597	0.26886	0.0175237	0.00752815	POLR2D	protein_coding	RNA polymerase II subunit D [Source:HGNC Symbol;Acc:HGNC:9191]
ENSG00000113356	0.68324	0.332513	0.000103804	0.0162735	POLR3G	protein_coding	RNA polymerase III subunit G [Source:HGNC Symbol;Acc:HGNC:30075]
ENSG00000161980	0.122557	0.227131	0.0088255	0.000638029	POLR3K	protein_coding	RNA polymerase III subunit K [Source:HGNC Symbol;Acc:HGNC:14121]
ENSG00000143190	0.22379	0.164004	0.00322607	0.0271879	POU2F1	protein_coding	POU class 2 homeobox 1 [Source:HGNC Symbol;Acc:HGNC:9212]
ENSG00000171960	0.138827	0.30518	0.0200279	0.000606921	PPIH	protein_coding	peptidylprolyl isomerase H [Source:HGNC Symbol;Acc:HGNC:14651]
ENSG00000115241	0.217088	0.17051	0.000524074	0.0050268	PPM1G	protein_coding	protein phosphatase, Mg2+/Mn2+ dependent 1G [Source:HGNC Symbol;Acc:HGNC:9278]
ENSG00000132825	0.219242	0.191046	0.00447596	0.0162491	PPP1R3D	protein_coding	protein phosphatase 1 regulatory subunit 3D [Source:HGNC Symbol;Acc:HGNC:9294]
ENSG00000074211	0.160896	0.122086	0.00722714	0.0428212	PPP2R2C	protein_coding	protein phosphatase 2 regulatory subunit Bgamma [Source:HGNC Symbol;Acc:HGNC:9306]
ENSG00000221823	0.21072	0.24667	0.0207331	0.0162491	PPP3R1	protein_coding	protein phosphatase 3 regulatory subunit B, alpha [Source:HGNC Symbol;Acc:HGNC:9317]
ENSG00000138073	0.120398	0.13173	0.0332592	0.0343837	PREB	protein_coding	prolactin regulatory element binding [Source:HGNC Symbol;Acc:HGNC:9356]
ENSG00000255874	0.708977	0.79822	0.0376945	0.0343071	PRECSIT	lncRNA	p53 regulated carcinoma associated Stat3 activating long intergenic non-protein coding transcript [Source:HGNC Symbol;Acc:HGNC:27492]
ENSG00000138078	0.123652	0.223037	0.0492354	0.00525643	PREPL	protein_coding	prolyl endopeptidase like [Source:HGNC Symbol;Acc:HGNC:30228]
ENSG00000106617	0.265587	0.263129	0.0242012	0.0387028	PRKAG2	protein_coding	protein kinase AMP-activated non-catalytic subunit gamma 2 [Source:HGNC Symbol;Acc:HGNC:9386]
ENSG00000115825	0.350309	0.333558	0.000368289	0.00142415	PRKD3	protein_coding	protein kinase D3 [Source:HGNC Symbol;Acc:HGNC:9408]
ENSG00000183668	0.63888	0.584004	0.00606339	0.0168314	PSG9	protein_coding	pregnancy specific beta-1-glycoprotein 9 [Source:HGNC Symbol;Acc:HGNC:9526]
ENSG00000068878	0.219551	0.192027	0.00809791	0.0258836	PSME4	protein_coding	proteasome activator subunit 4 [Source:HGNC Symbol;Acc:HGNC:20635]
ENSG00000132300	0.12664	0.22008	0.0446162	0.00554624	PTCD3	protein_coding	pentatricopeptide repeat domain 3 [Source:HGNC Symbol;Acc:HGNC:24717]
ENSG00000125384	0.664903	0.951326	0.008123	0.00236982	PTGER2	protein_coding	prostaglandin E receptor 2 [Source:HGNC Symbol;Acc:HGNC:9594]
ENSG00000070778	0.815654	0.346277	3.94368e-06	0.00286633	PTPN21	protein_coding	protein tyrosine phosphatase non-receptor type 21 [Source:HGNC Symbol;Acc:HGNC:9651]
ENSG00000088179	0.174328	0.237497	0.0382156	0.0152426	PTPN4	protein_coding	protein tyrosine phosphatase non-receptor type 4 [Source:HGNC Symbol;Acc:HGNC:9656]
ENSG00000241472	0.40932	0.544483	0.0100233	0.00428675	PTPRG-AS1	lncRNA	PTPRG antisense RNA 1 [Source:HGNC Symbol;Acc:HGNC:44638]
ENSG00000187024	0.487066	0.205759	9.85232e-05	0.0292225	PTRH1	protein_coding	peptidyl-tRNA hydrolase 1 homolog [Source:HGNC Symbol;Acc:HGNC:27039]
ENSG00000143811	0.2529	0.233335	0.00454993	0.0127127	PYCR2	protein_coding	pyrroline-5-carboxylate reductase 2 [Source:HGNC Symbol;Acc:HGNC:30262]
ENSG00000171016	0.174069	0.189099	0.0382156	0.0402756	PYGO1	protein_coding	pygopus family PHD finger 1 [Source:HGNC Symbol;Acc:HGNC:30256]
ENSG00000048991	0.128259	0.160208	0.00866167	0.00514636	R3HDM1	protein_coding	R3H domain containing 1 [Source:HGNC Symbol;Acc:HGNC:9757]
ENSG00000136933	0.185672	0.170648	0.0204646	0.0446398	RABEPK	protein_coding	Rab9 effector protein with kelch motifs [Source:HGNC Symbol;Acc:HGNC:16896]
ENSG00000085999	0.258998	0.445083	0.000718546	7.69899e-05	RAD54L	protein_coding	RAD54 like [Source:HGNC Symbol;Acc:HGNC:9826]
ENSG00000099901	0.206137	0.240624	0.000299938	0.000350856	RANBP1	protein_coding	RAN binding protein 1 [Source:HGNC Symbol;Acc:HGNC:9847]
ENSG00000138698	0.219785	0.209859	0.00613215	0.0139726	RAP1GDS1	protein_coding	Rap1 GTPase-GDP dissociation stimulator 1 [Source:HGNC Symbol;Acc:HGNC:9859]
ENSG00000101773	0.125709	0.182681	0.0318814	0.00907217	RBBP8	protein_coding	RB binding protein 8, endonuclease [Source:HGNC Symbol;Acc:HGNC:9891]
ENSG00000080839	0.252823	0.258749	0.00264075	0.0048052	RBL1	protein_coding	RB transcriptional corepressor like 1 [Source:HGNC Symbol;Acc:HGNC:9893]
ENSG00000184863	0.118504	0.16541	0.0110178	0.00364026	RBM33	protein_coding	RNA binding motif protein 33 [Source:HGNC Symbol;Acc:HGNC:27223]
ENSG00000135870	0.169153	0.208723	0.0158059	0.00961545	RC3H1	protein_coding	ring finger and CCCH-type domains 1 [Source:HGNC Symbol;Acc:HGNC:29434]
ENSG00000068615	0.48219	0.440605	0.00119628	0.00444302	REEP1	protein_coding	receptor accessory protein 1 [Source:HGNC Symbol;Acc:HGNC:25786]
ENSG00000162924	0.14779	0.345882	0.00854925	0.000147998	REL	protein_coding	REL proto-oncogene, NF-kB subunit [Source:HGNC Symbol;Acc:HGNC:9954]
ENSG00000134533	0.564135	0.217598	7.55469e-05	0.0362686	RERG	protein_coding	RAS like estrogen regulated growth inhibitor [Source:HGNC Symbol;Acc:HGNC:15980]
ENSG00000111404	0.715878	0.915687	0.00215611	0.00128737	RERGL	protein_coding	RERG like [Source:HGNC Symbol;Acc:HGNC:26213]
ENSG00000049541	0.113605	0.144393	0.037009	0.0200327	RFC2	protein_coding	replication factor C subunit 2 [Source:HGNC Symbol;Acc:HGNC:9970]
ENSG00000168411	0.26561	0.222987	5.12652e-05	0.000555325	RFWD3	protein_coding	ring finger and WD repeat domain 3 [Source:HGNC Symbol;Acc:HGNC:25539]
ENSG00000174136	0.346615	0.216102	0.000232987	0.00873098	RGMB	protein_coding	repulsive guidance molecule BMP co-receptor b [Source:HGNC Symbol;Acc:HGNC:26896]
ENSG00000076344	0.461877	0.530883	0.0263283	0.0223052	RGS11	protein_coding	regulator of G protein signaling 11 [Source:HGNC Symbol;Acc:HGNC:9993]
ENSG00000072422	0.327514	0.285251	0.0127913	0.0381648	RHOBTB1	protein_coding	Rho related BTB domain containing 1 [Source:HGNC Symbol;Acc:HGNC:18738]
ENSG00000039523	0.157128	0.246559	0.0241903	0.00454075	RIPOR1	protein_coding	RHO family interacting cell polarization regulator 1 [Source:HGNC Symbol;Acc:HGNC:25836]
ENSG00000234171	0.207736	0.273929	0.0437167	0.0202544	RNASEH1-AS1	lncRNA	RNASEH1 antisense RNA 1 [Source:HGNC Symbol;Acc:HGNC:49289]
ENSG00000135828	0.41977	0.272072	0.000897484	0.0189542	RNASEL	protein_coding	ribonuclease L [Source:HGNC Symbol;Acc:HGNC:10050]
ENSG00000239305	0.239059	0.22851	0.000813547	0.002637	RNF103	protein_coding	ring finger protein 103 [Source:HGNC Symbol;Acc:HGNC:12859]
ENSG00000157450	0.163141	0.231822	0.0413003	0.0135855	RNF111	protein_coding	ring finger protein 111 [Source:HGNC Symbol;Acc:HGNC:17384]
ENSG00000163961	0.170254	0.147053	0.00945364	0.0309657	RNF168	protein_coding	ring finger protein 168 [Source:HGNC Symbol;Acc:HGNC:26661]
ENSG00000105982	0.487626	0.434507	0.00585492	0.0182739	RNF32	protein_coding	ring finger protein 32 [Source:HGNC Symbol;Acc:HGNC:17118]
ENSG00000269609	0.199568	0.184248	0.0215153	0.0453506	RPARP-AS1	lncRNA	RPARP antisense RNA 1 [Source:HGNC Symbol;Acc:HGNC:45238]
ENSG00000197498	0.286585	0.237384	0.0114823	0.0428212	RPF2	protein_coding	ribosome production factor 2 homolog [Source:HGNC Symbol;Acc:HGNC:20870]
ENSG00000163584	0.735276	0.444593	0.000248842	0.0105536	RPL22L1	protein_coding	ribosomal protein L22 like 1 [Source:HGNC Symbol;Acc:HGNC:27610]
ENSG00000240356	0.26531	0.425801	0.0330495	0.00582617	RPL23AP7	transcribed_processed_pseudogene	ribosomal protein L23a pseudogene 7 [Source:HGNC Symbol;Acc:HGNC:17336]
ENSG00000071082	0.180435	0.177292	0.0294181	0.0471619	RPL31	protein_coding	ribosomal protein L31 [Source:HGNC Symbol;Acc:HGNC:10334]
ENSG00000251474	0.387894	0.429612	0.00195357	0.00250257	RPL32P3	transcribed_unprocessed_pseudogene	ribosomal protein L32 pseudogene 3 [Source:HGNC Symbol;Acc:HGNC:27024]
ENSG00000171848	0.408938	0.484067	6.9244e-06	9.91418e-06	RRM2	protein_coding	ribonucleotide reductase regulatory subunit M2 [Source:HGNC Symbol;Acc:HGNC:10452]
ENSG00000114993	0.31253	0.237213	0.00077651	0.00817175	RTKN	protein_coding	rhotekin [Source:HGNC Symbol;Acc:HGNC:10466]
ENSG00000215012	0.202821	0.194305	0.0178483	0.0341906	RTL10	protein_coding	retrotransposon Gag like 10 [Source:HGNC Symbol;Acc:HGNC:26112]
ENSG00000115310	0.35123	0.180443	3.97428e-05	0.00622252	RTN4	protein_coding	reticulon 4 [Source:HGNC Symbol;Acc:HGNC:14085]
ENSG00000198853	0.822511	0.48733	0.000374759	0.0155376	RUSC2	protein_coding	RUN and SH3 domain containing 2 [Source:HGNC Symbol;Acc:HGNC:23625]
ENSG00000189171	0.363224	0.62536	0.013751	0.00157762	S100A13	protein_coding	S100 calcium binding protein A13 [Source:HGNC Symbol;Acc:HGNC:10490]
ENSG00000188643	0.368159	0.263764	4.2242e-05	0.00120681	S100A16	protein_coding	S100 calcium binding protein A16 [Source:HGNC Symbol;Acc:HGNC:20441]
ENSG00000168061	0.2114	0.201347	0.0172739	0.0340619	SAC3D1	protein_coding	SAC3 domain containing 1 [Source:HGNC Symbol;Acc:HGNC:30179]
ENSG00000102098	0.543847	0.586984	0.000158146	0.000321206	SCML2	protein_coding	Scm polycomb group protein like 2 [Source:HGNC Symbol;Acc:HGNC:10581]
ENSG00000175356	1.02534	0.556952	4.2242e-05	0.00503512	SCUBE2	protein_coding	signal peptide, CUB domain and EGF like domain containing 2 [Source:HGNC Symbol;Acc:HGNC:30425]
ENSG00000128228	0.243291	0.279647	0.00952921	0.00845569	SDF2L1	protein_coding	stromal cell derived factor 2 like 1 [Source:HGNC Symbol;Acc:HGNC:10676]
ENSG00000166562	0.188582	0.44514	0.0435592	0.00111628	SEC11C	protein_coding	SEC11 homolog C, signal peptidase complex subunit [Source:HGNC Symbol;Acc:HGNC:23400]
ENSG00000138018	0.195475	0.156768	0.00563167	0.0280749	SELENOI	protein_coding	selenoprotein I [Source:HGNC Symbol;Acc:HGNC:29361]
ENSG00000135622	0.467673	0.389316	0.00482362	0.0210575	SEMA4F	protein_coding	ssemaphorin 4F [Source:HGNC Symbol;Acc:HGNC:10734]
ENSG00000197249	0.675508	0.500589	0.00465894	0.0341024	SERPINA1	protein_coding	serpin family A member 1 [Source:HGNC Symbol;Acc:HGNC:8941]
ENSG00000188488	0.623162	0.602624	0.00258845	0.00621653	SERPINA5	protein_coding	serpin family A member 5 [Source:HGNC Symbol;Acc:HGNC:8723]
ENSG00000163536	0.840318	0.698952	0.0105765	0.0395452	SERPINI1	protein_coding	serpin family I member 1 [Source:HGNC Symbol;Acc:HGNC:8943]
ENSG00000179833	0.184902	0.172993	0.00729144	0.0177632	SERTAD2	protein_coding	SERTA domain containing 2 [Source:HGNC Symbol;Acc:HGNC:30784]
ENSG00000175793	0.706411	0.499739	0.00011756	0.00277718	SFN	protein_coding	stratifin [Source:HGNC Symbol;Acc:HGNC:10773]
ENSG00000163069	0.363674	0.588378	0.000359168	6.08459e-05	SGCB	protein_coding	sarcoglycan beta [Source:HGNC Symbol;Acc:HGNC:10806]
ENSG00000104205	0.819609	0.257473	2.30275e-05	0.0405379	SGK3	protein_coding	serum/glucocorticoid regulated kinase family member 3 [Source:HGNC Symbol;Acc:HGNC:10812]
ENSG00000164023	0.840538	0.7101	0.000156907	0.00138954	SGMS2	protein_coding	sphingomyelin synthase 2 [Source:HGNC Symbol;Acc:HGNC:28395]
ENSG00000164690	0.514987	0.450477	0.000904996	0.00444302	SHH	protein_coding	sonic hedgehog signaling molecule [Source:HGNC Symbol;Acc:HGNC:10848]
ENSG00000181788	0.789941	0.210378	2.88524e-06	0.0202005	SIAH2	protein_coding	siah E3 ubiquitin protein ligase 2 [Source:HGNC Symbol;Acc:HGNC:10858]
ENSG00000165480	0.129865	0.23289	0.0233242	0.00221555	SKA3	protein_coding	spindle and kinetochore associated complex subunit 3 [Source:HGNC Symbol;Acc:HGNC:20262]
ENSG00000145604	0.334198	0.350573	0.000717827	0.00144961	SKP2	protein_coding	S-phase kinase associated protein 2 [Source:HGNC Symbol;Acc:HGNC:10901]
ENSG00000155380	0.850904	0.314662	1.75758e-05	0.0173968	SLC16A1	protein_coding	solute carrier family 16 member 1 [Source:HGNC Symbol;Acc:HGNC:10922]
ENSG00000112394	0.479917	0.490232	0.012838	0.0193805	SLC16A10	protein_coding	solute carrier family 16 member 10 [Source:HGNC Symbol;Acc:HGNC:17027]
ENSG00000115902	0.55734	0.297448	0.000288796	0.0206995	SLC1A4	protein_coding	solute carrier family 1 member 4 [Source:HGNC Symbol;Acc:HGNC:10942]
ENSG00000144136	0.502097	0.302129	8.70969e-06	0.000889133	SLC20A1	protein_coding	solute carrier family 20 member 1 [Source:HGNC Symbol;Acc:HGNC:10946]
ENSG00000125454	0.366705	0.207991	0.000229439	0.0135993	SLC25A19	protein_coding	solute carrier family 25 member 19 [Source:HGNC Symbol;Acc:HGNC:14409]
ENSG00000174032	0.211373	0.210145	0.00129197	0.00304215	SLC25A30	protein_coding	solute carrier family 25 member 30 [Source:HGNC Symbol;Acc:HGNC:27371]
ENSG00000155850	1.52177	0.408748	2.47542e-06	0.0178531	SLC26A2	protein_coding	solute carrier family 26 member 2 [Source:HGNC Symbol;Acc:HGNC:10994]
ENSG00000136868	0.163428	0.103157	0.00178272	0.0341024	SLC31A1	protein_coding	solute carrier family 31 member 1 [Source:HGNC Symbol;Acc:HGNC:11016]
ENSG00000142494	0.610019	0.416521	0.00167157	0.0231207	SLC47A1	protein_coding	solute carrier family 47 member 1 [Source:HGNC Symbol;Acc:HGNC:25588]
ENSG00000144290	1.67515	1.39016	0.000404822	0.00302211	SLC4A10	protein_coding	solute carrier family 4 member 10 [Source:HGNC Symbol;Acc:HGNC:13811]
ENSG00000114923	0.400131	0.460036	0.0288066	0.0242289	SLC4A3	protein_coding	solute carrier family 4 member 3 [Source:HGNC Symbol;Acc:HGNC:11029]
ENSG00000133302	0.189832	0.268108	0.0169607	0.00538188	SLF1	protein_coding	SMC5-SMC6 complex localization factor 1 [Source:HGNC Symbol;Acc:HGNC:25408]
ENSG00000113810	0.11317	0.190609	0.0231511	0.00297339	SMC4	protein_coding	structural maintenance of chromosomes 4 [Source:HGNC Symbol;Acc:HGNC:14013]
ENSG00000224531	0.191537	0.236427	0.00793079	0.00501468	SMIM13	protein_coding	small integral membrane protein 13 [Source:HGNC Symbol;Acc:HGNC:27356]
ENSG00000136699	0.19177	0.208773	0.0031527	0.00409119	SMPD4	protein_coding	sphingomyelin phosphodiesterase 4 [Source:HGNC Symbol;Acc:HGNC:32949]
ENSG00000135632	0.249952	0.166218	0.000460809	0.0101458	SMYD5	protein_coding	SMYD family member 5 [Source:HGNC Symbol;Acc:HGNC:16258]
ENSG00000255717	0.346334	0.187567	0.00017826	0.014208	SNHG1	lncRNA	small nucleolar RNA host gene 1 [Source:HGNC Symbol;Acc:HGNC:32688]
ENSG00000196756	0.27981	0.158817	0.000748902	0.0301954	SNHG17	lncRNA	small nucleolar RNA host gene 17 [Source:HGNC Symbol;Acc:HGNC:48600]
ENSG00000281398	0.592548	0.172011	3.30198e-06	0.0166259	SNHG4	lncRNA	small nucleolar RNA host gene 4 [Source:HGNC Symbol;Acc:HGNC:32964]
ENSG00000180008	0.164201	0.248306	0.0137341	0.00301124	SOCS4	protein_coding	suppressor of cytokine signaling 4 [Source:HGNC Symbol;Acc:HGNC:19392]
ENSG00000259479	0.274096	0.233922	0.00537924	0.0205923	SORD2P	transcribed_unprocessed_pseudogene	sorbitol dehydrogenase 2, pseudogene [Source:HGNC Symbol;Acc:HGNC:49919]
ENSG00000067066	1.42731	0.812297	1.64448e-05	0.00199283	SP100	protein_coding	SP100 nuclear antigen [Source:HGNC Symbol;Acc:HGNC:11206]
ENSG00000269959	0.488144	0.999852	0.00519154	0.000193433	SPACA6P-AS	lncRNA	SPACA6P antisense RNA [Source:HGNC Symbol;Acc:HGNC:49383]
ENSG00000167523	0.282869	0.181047	0.00279151	0.0430144	SPATA33	protein_coding	spermatogenesis associated 33 [Source:HGNC Symbol;Acc:HGNC:26463]
ENSG00000042317	0.554194	0.306201	0.00108715	0.0422833	SPATA7	protein_coding	spermatogenesis associated 7 [Source:HGNC Symbol;Acc:HGNC:20423]
ENSG00000122711	2.21123	1.30888	4.2242e-05	0.00318456	SPINK4	protein_coding	serine peptidase inhibitor Kazal type 4 [Source:HGNC Symbol;Acc:HGNC:16646]
ENSG00000144228	0.262922	0.16901	0.00204009	0.0345899	SPOPL	protein_coding	speckle type BTB/POZ protein like [Source:HGNC Symbol;Acc:HGNC:27934]
ENSG00000068784	0.147117	0.155034	0.0369497	0.043836	SRBD1	protein_coding	S1 RNA binding domain 1 [Source:HGNC Symbol;Acc:HGNC:25521]
ENSG00000196935	0.420856	0.228746	0.000255121	0.0178531	SRGAP1	protein_coding	SLIT-ROBO Rho GTPase activating protein 1 [Source:HGNC Symbol;Acc:HGNC:17382]
ENSG00000161547	0.150255	0.141492	0.00805816	0.018682	SRSF2	protein_coding	serine and arginine rich splicing factor 2 [Source:HGNC Symbol;Acc:HGNC:10783]
ENSG00000114850	0.268417	0.207536	0.00700056	0.0389	SSR3	protein_coding	signal sequence receptor subunit 3 [Source:HGNC Symbol;Acc:HGNC:11325]
ENSG00000117155	0.14267	0.165486	0.0438009	0.0352111	SSX2IP	protein_coding	SSX family member 2 interacting protein [Source:HGNC Symbol;Acc:HGNC:16509]
ENSG00000214530	0.152816	0.133255	0.00292488	0.0115794	STARD10	protein_coding	StAR related lipid transfer domain containing 10 [Source:HGNC Symbol;Acc:HGNC:10666]
ENSG00000084090	0.16123	0.129834	0.00120402	0.00845569	STARD7	protein_coding	StAR related lipid transfer domain containing 7 [Source:HGNC Symbol;Acc:HGNC:18063]
ENSG00000157303	0.619901	0.430992	4.2242e-05	0.00142415	SUSD3	protein_coding	sushi domain containing 3 [Source:HGNC Symbol;Acc:HGNC:28391]
ENSG00000152455	0.238126	0.327899	0.0171931	0.00619221	SUV39H2	protein_coding	suppressor of variegation 3-9 homolog 2 [Source:HGNC Symbol;Acc:HGNC:17287]
ENSG00000102362	0.256393	0.275269	0.00468484	0.00619221	SYTL4	protein_coding	synaptotagmin like 4 [Source:HGNC Symbol;Acc:HGNC:15588]
ENSG00000146350	0.613432	0.498347	0.0128602	0.0497579	TBC1D32	protein_coding	TBC1 domain family member 32 [Source:HGNC Symbol;Acc:HGNC:21485]
ENSG00000134827	4.83459	3.2175	8.51631e-07	2.78081e-05	TCN1	protein_coding	transcobalamin 1 [Source:HGNC Symbol;Acc:HGNC:11652]
ENSG00000218336	0.484488	0.158163	3.8195e-05	0.0466817	TENM3	protein_coding	teneurin transmembrane protein 3 [Source:HGNC Symbol;Acc:HGNC:29944]
ENSG00000112941	0.157638	0.204355	0.00405933	0.00207963	TENT4A	protein_coding	terminal nucleotidyltransferase 4A [Source:HGNC Symbol;Acc:HGNC:16705]
ENSG00000168769	0.630863	0.402307	2.68185e-05	0.00150869	TET2	protein_coding	tet methylcytosine dioxygenase 2 [Source:HGNC Symbol;Acc:HGNC:25941]
ENSG00000187605	0.222383	0.188778	0.00159511	0.00817175	TET3	protein_coding	tet methylcytosine dioxygenase 3 [Source:HGNC Symbol;Acc:HGNC:28313]
ENSG00000121101	0.523388	0.383742	0.00181044	0.0180633	TEX14	protein_coding	testis expressed 14, intercellular bridge forming factor [Source:HGNC Symbol;Acc:HGNC:11737]
ENSG00000087510	0.459379	0.169607	5.71169e-06	0.00797026	TFAP2C	protein_coding	transcription factor AP-2 gamma [Source:HGNC Symbol;Acc:HGNC:11744]
ENSG00000198176	0.105896	0.160445	0.018549	0.00414282	TFDP1	protein_coding	transcription factor Dp-1 [Source:HGNC Symbol;Acc:HGNC:11749]
ENSG00000160182	1.77782	0.57563	3.30198e-06	0.0095658	TFF1	protein_coding	trefoil factor 1 [Source:HGNC Symbol;Acc:HGNC:11755]
ENSG00000160180	0.665779	0.423529	0.000208313	0.00722203	TFF3	protein_coding	trefoil factor 3 [Source:HGNC Symbol;Acc:HGNC:11757]
ENSG00000163235	0.968891	0.367597	8.09431e-05	0.0404448	TGFA	protein_coding	transforming growth factor alpha [Source:HGNC Symbol;Acc:HGNC:11765]
ENSG00000137574	0.236177	0.182852	0.00406673	0.0251718	TGS1	protein_coding	trimethylguanosine synthase 1 [Source:HGNC Symbol;Acc:HGNC:17843]
ENSG00000051596	0.124324	0.227847	0.0190372	0.0015993	THOC3	protein_coding	THO complex 3 [Source:HGNC Symbol;Acc:HGNC:19072]
ENSG00000100296	0.11383	0.116597	0.0238767	0.0332779	THOC5	protein_coding	THO complex 5 [Source:HGNC Symbol;Acc:HGNC:19074]
ENSG00000187720	0.891561	0.402861	8.70969e-06	0.00395845	THSD4	protein_coding	thrombospondin type 1 domain containing 4 [Source:HGNC Symbol;Acc:HGNC:25835]
ENSG00000145365	0.722264	0.53534	0.00017537	0.00290329	TIFA	protein_coding	TRAF interacting protein with forkhead associated domain [Source:HGNC Symbol;Acc:HGNC:19075]
ENSG00000126953	0.1943	0.206945	0.0126363	0.0158039	TIMM8A	protein_coding	translocase of inner mitochondrial membrane 8A [Source:HGNC Symbol;Acc:HGNC:11817]
ENSG00000102265	0.442983	0.422715	0.00712039	0.0158535	TIMP1	protein_coding	TIMP metallopeptidase inhibitor 1 [Source:HGNC Symbol;Acc:HGNC:11820]
ENSG00000075131	0.33098	0.259724	0.00121604	0.00958496	TIPIN	protein_coding	TIMELESS interacting protein [Source:HGNC Symbol;Acc:HGNC:30750]
ENSG00000152078	0.461005	0.435012	0.0200279	0.0398562	TLCD4	protein_coding	TLC domain containing 4 [Source:HGNC Symbol;Acc:HGNC:26477]
ENSG00000064115	0.185222	0.131039	0.00281669	0.0287276	TM7SF3	protein_coding	transmembrane 7 superfamily member 3 [Source:HGNC Symbol;Acc:HGNC:23049]
ENSG00000151353	0.111276	0.126069	0.0372567	0.033134	TMEM18	protein_coding	transmembrane protein 18 [Source:HGNC Symbol;Acc:HGNC:25257]
ENSG00000170417	0.278868	0.461199	0.00871711	0.00121333	TMEM182	protein_coding	transmembrane protein 182 [Source:HGNC Symbol;Acc:HGNC:26391]
ENSG00000226479	0.222495	0.114052	0.000855328	0.0488134	TMEM185B	protein_coding	transmembrane protein 185B [Source:HGNC Symbol;Acc:HGNC:18896]
ENSG00000109133	0.106179	0.125364	0.0357842	0.0266628	TMEM33	protein_coding	transmembrane protein 33 [Source:HGNC Symbol;Acc:HGNC:25541]
ENSG00000176142	0.143484	0.27466	0.0420436	0.00309358	TMEM39A	protein_coding	transmembrane protein 39A [Source:HGNC Symbol;Acc:HGNC:25600]
ENSG00000120802	0.103776	0.111336	0.0450927	0.0488852	TMPO	protein_coding	thymopoietin [Source:HGNC Symbol;Acc:HGNC:11875]
ENSG00000137747	0.525804	0.265118	3.30198e-06	0.00109209	TMPRSS13	protein_coding	transmembrane serine protease 13 [Source:HGNC Symbol;Acc:HGNC:29808]
ENSG00000160183	1.34878	0.589916	0.000126616	0.0293999	TMPRSS3	protein_coding	transmembrane serine protease 3 [Source:HGNC Symbol;Acc:HGNC:11877]
ENSG00000034510	0.327085	0.223228	0.00145859	0.0209415	TMSB10	protein_coding	thymosin beta 10 [Source:HGNC Symbol;Acc:HGNC:11879]
ENSG00000120889	0.272167	0.111829	0.000103804	0.0339266	TNFRSF10B	protein_coding	TNF receptor superfamily member 10b [Source:HGNC Symbol;Acc:HGNC:11905]
ENSG00000163781	0.103982	0.195242	0.0443234	0.00369974	TOPBP1	protein_coding	DNA topoisomerase II binding protein 1 [Source:HGNC Symbol;Acc:HGNC:17008]
ENSG00000124191	1.14487	0.700828	0.000688723	0.0202749	TOX2	protein_coding	TOX high mobility group box family member 2 [Source:HGNC Symbol;Acc:HGNC:16095]
ENSG00000089195	0.262042	0.183514	0.00011916	0.00291194	TRMT6	protein_coding	tRNA methyltransferase 6 [Source:HGNC Symbol;Acc:HGNC:20900]
ENSG00000105948	0.341073	0.260116	0.00215763	0.0170622	TTC26	protein_coding	tetratricopeptide repeat domain 26 [Source:HGNC Symbol;Acc:HGNC:21882]
ENSG00000085831	0.254696	0.162344	0.00264711	0.0422097	TTC39A	protein_coding	tetratricopeptide repeat domain 39A [Source:HGNC Symbol;Acc:HGNC:18657]
ENSG00000114999	0.293466	0.191089	0.000119992	0.0043305	TTL	protein_coding	tubulin tyrosine ligase [Source:HGNC Symbol;Acc:HGNC:21586]
ENSG00000135912	0.153854	0.175609	0.00934233	0.00858138	TTLL4	protein_coding	tubulin tyrosine ligase like 4 [Source:HGNC Symbol;Acc:HGNC:28976]
ENSG00000124120	0.14619	0.137719	0.0104774	0.0230491	TTPAL	protein_coding	alpha tocopherol transfer protein like [Source:HGNC Symbol;Acc:HGNC:16114]
ENSG00000123416	0.166954	0.318431	0.00632283	0.000354045	TUBA1B	protein_coding	tubulin alpha 1b [Source:HGNC Symbol;Acc:HGNC:18809]
ENSG00000167553	0.223119	0.263844	0.000530528	0.000548331	TUBA1C	protein_coding	tubulin alpha 1c [Source:HGNC Symbol;Acc:HGNC:20768]
ENSG00000196230	0.320904	0.234102	6.34518e-05	0.00149791	TUBB	protein_coding	tubulin beta class I [Source:HGNC Symbol;Acc:HGNC:20778]
ENSG00000188229	0.154364	0.173245	0.0067882	0.00696702	TUBB4B	protein_coding	tubulin beta 4B class IVb [Source:HGNC Symbol;Acc:HGNC:20771]
ENSG00000176014	0.237264	0.329165	0.00628665	0.00221555	TUBB6	protein_coding	tubulin beta 6 class V [Source:HGNC Symbol;Acc:HGNC:20776]
ENSG00000176890	0.119159	0.289776	0.0297011	0.000546282	TYMS	protein_coding	thymidylate synthetase [Source:HGNC Symbol;Acc:HGNC:12441]
ENSG00000009335	0.159523	0.145277	0.00328695	0.0101815	UBE3C	protein_coding	ubiquitin protein ligase E3C [Source:HGNC Symbol;Acc:HGNC:16803]
ENSG00000118420	0.257072	0.130185	0.000455089	0.0343592	UBE3D	protein_coding	ubiquitin protein ligase E3D [Source:HGNC Symbol;Acc:HGNC:21381]
ENSG00000116750	0.177894	0.146993	0.00919224	0.0364149	UCHL5	protein_coding	ubiquitin C-terminal hydrolase L5 [Source:HGNC Symbol;Acc:HGNC:19678]
ENSG00000196620	2.03162	1.40815	1.21864e-05	0.000499861	UGT2B15	protein_coding	UDP glucuronosyltransferase family 2 member B15 [Source:HGNC Symbol;Acc:HGNC:12546]
ENSG00000174607	0.759352	0.692534	0.000126245	0.000758759	UGT8	protein_coding	UDP glycosyltransferase 8 [Source:HGNC Symbol;Acc:HGNC:12555]
ENSG00000276043	0.355657	0.233019	0.000380995	0.00955579	UHRF1	protein_coding	ubiquitin like with PHD and ring finger domains 1 [Source:HGNC Symbol;Acc:HGNC:12556]
ENSG00000131015	0.390362	0.554682	0.0193071	0.00597482	ULBP2	protein_coding	UL16 binding protein 2 [Source:HGNC Symbol;Acc:HGNC:14894]
ENSG00000092929	1.07903	0.666101	3.12533e-05	0.00213114	UNC13D	protein_coding	unc-13 homolog D [Source:HGNC Symbol;Acc:HGNC:23147]
ENSG00000076248	0.420873	0.144225	1.43791e-05	0.0214687	UNG	protein_coding	uracil DNA glycosylase [Source:HGNC Symbol;Acc:HGNC:12572]
ENSG00000168883	0.16047	0.202067	0.0112736	0.00626585	USP39	protein_coding	ubiquitin specific peptidase 39 [Source:HGNC Symbol;Acc:HGNC:20071]
ENSG00000134215	0.628567	0.748436	3.05433e-05	4.31492e-05	VAV3	protein_coding	vav guanine nucleotide exchange factor 3 [Source:HGNC Symbol;Acc:HGNC:12659]
ENSG00000100749	0.15445	0.275978	0.0179535	0.00174571	VRK1	protein_coding	VRK serine/threonine kinase 1 [Source:HGNC Symbol;Acc:HGNC:12718]
ENSG00000028116	0.194821	0.286429	0.004239	0.00111628	VRK2	protein_coding	VRK serine/threonine kinase 2 [Source:HGNC Symbol;Acc:HGNC:12719]
ENSG00000163026	0.255092	0.2842	0.00649891	0.0069481	WDCP	protein_coding	WD repeat and coiled coil containing [Source:HGNC Symbol;Acc:HGNC:26157]
ENSG00000136709	0.123632	0.119146	0.0159859	0.0302624	WDR33	protein_coding	WD repeat domain 33 [Source:HGNC Symbol;Acc:HGNC:25651]
ENSG00000115935	0.615717	0.630425	8.4833e-06	3.40824e-05	WIPF1	protein_coding	WAS/WASL interacting protein family member 1 [Source:HGNC Symbol;Acc:HGNC:12736]
ENSG00000151718	0.212779	0.190986	0.0101062	0.0275987	WWC2	protein_coding	WW and C2 domain containing 2 [Source:HGNC Symbol;Acc:HGNC:24148]
ENSG00000182489	0.687292	0.61995	0.00792815	0.0221622	XKRX	protein_coding	XK related X-linked [Source:HGNC Symbol;Acc:HGNC:29845]
ENSG00000196584	0.386837	0.513865	0.000229911	0.000131737	XRCC2	protein_coding	X-ray repair cross complementing 2 [Source:HGNC Symbol;Acc:HGNC:12829]
ENSG00000126215	0.230034	0.213565	0.0061238	0.0158323	XRCC3	protein_coding	X-ray repair cross complementing 3 [Source:HGNC Symbol;Acc:HGNC:12830]
ENSG00000065978	0.18037	0.108135	0.000735954	0.0231537	YBX1	protein_coding	Y-box binding protein 1 [Source:HGNC Symbol;Acc:HGNC:8014]
ENSG00000060138	0.186588	0.120209	0.00201925	0.0340722	YBX3	protein_coding	Y-box binding protein 3 [Source:HGNC Symbol;Acc:HGNC:2428]
ENSG00000141664	0.174007	0.201849	0.00468484	0.00422379	ZCCHC2	protein_coding	zinc finger CCHC-type containing 2 [Source:HGNC Symbol;Acc:HGNC:22916]
ENSG00000247315	0.154525	0.211688	0.00612878	0.00227179	ZCCHC3	protein_coding	zinc finger CCHC-type containing 3 [Source:HGNC Symbol;Acc:HGNC:16230]
ENSG00000177054	0.119178	0.210998	0.0434308	0.00490018	ZDHHC13	protein_coding	zinc finger DHHC-type palmitoyltransferase 13 [Source:HGNC Symbol;Acc:HGNC:18413]
ENSG00000128016	0.331685	0.326835	0.00722114	0.0138508	ZFP36	protein_coding	ZFP36 ring finger protein [Source:HGNC Symbol;Acc:HGNC:12862]
ENSG00000181638	0.181157	0.190329	0.0358448	0.0433559	ZFP41	protein_coding	ZFP41 zinc finger protein [Source:HGNC Symbol;Acc:HGNC:26786]
ENSG00000196418	0.331715	0.350917	0.0261839	0.0319704	ZNF124	protein_coding	zinc finger protein 124 [Source:HGNC Symbol;Acc:HGNC:12907]
ENSG00000147394	0.218209	0.273507	0.0421669	0.0242332	ZNF185	protein_coding	zinc finger protein 185 with LIM domain [Source:HGNC Symbol;Acc:HGNC:12976]
ENSG00000275111	0.228736	0.326064	0.0232417	0.00705736	ZNF2	protein_coding	zinc finger protein 2 [Source:HGNC Symbol;Acc:HGNC:12991]
ENSG00000010539	0.18624	0.242508	0.0225124	0.010525	ZNF200	protein_coding	zinc finger protein 200 [Source:HGNC Symbol;Acc:HGNC:12993]
ENSG00000165244	0.573163	0.290025	8.4833e-06	0.00213114	ZNF367	protein_coding	zinc finger protein 367 [Source:HGNC Symbol;Acc:HGNC:18320]
ENSG00000127081	0.529225	0.468136	0.00558578	0.0181077	ZNF484	protein_coding	zinc finger protein 484 [Source:HGNC Symbol;Acc:HGNC:23385]
ENSG00000081386	0.127238	0.137503	0.0261605	0.0291522	ZNF510	protein_coding	zinc finger protein 510 [Source:HGNC Symbol;Acc:HGNC:29161]
ENSG00000101493	0.319945	0.140252	7.28413e-05	0.020485	ZNF516	protein_coding	zinc finger protein 516 [Source:HGNC Symbol;Acc:HGNC:28990]
ENSG00000183647	0.345006	0.390649	0.0103224	0.00967364	ZNF530	protein_coding	zinc finger protein 530 [Source:HGNC Symbol;Acc:HGNC:29297]
ENSG00000186017	0.351817	0.375997	0.0171758	0.020485	ZNF566	protein_coding	zinc finger protein 566 [Source:HGNC Symbol;Acc:HGNC:25919]
ENSG00000196110	0.54742	0.56398	0.00613215	0.00956942	ZNF699	protein_coding	zinc finger protein 699 [Source:HGNC Symbol;Acc:HGNC:24750]
ENSG00000196757	0.238754	0.400314	0.0103282	0.0013475	ZNF700	protein_coding	zinc finger protein 700 [Source:HGNC Symbol;Acc:HGNC:25292]
ENSG00000133624	0.258739	0.516934	0.031409	0.00178938	ZNF767P	transcribed_unprocessed_pseudogene	zinc finger family member 767, pseudogene [Source:HGNC Symbol;Acc:HGNC:21884]
ENSG00000105750	0.587362	0.955426	0.000463439	7.69899e-05	ZNF85	protein_coding	zinc finger protein 85 [Source:HGNC Symbol;Acc:HGNC:13160]
ENSG00000121903	0.460369	0.676685	0.00515667	0.00136282	ZSCAN20	protein_coding	zinc finger and SCAN domain containing 20 [Source:HGNC Symbol;Acc:HGNC:13093]
ENSG00000122952	0.132538	0.236942	0.0187046	0.00178938	ZWINT	protein_coding	ZW10 interacting kinetochore protein [Source:HGNC Symbol;Acc:HGNC:13195]
