# Supplementary material for: MAGI1 Prevents Senescence and Promotes the DNA Damage Response in ER+ Breast Cancer
Source: Cells. 2023 Jul 25;12(15):1929. doi: 10.3390/cells12151929 (PMC10417439; doi:10.3390/cells12151929)
Supplement: Supplementary file 1 [file cells-12-01929-s001.zip › Suppl_Table_3_GO_BP_UP_DOWN.xlsx]

## Sheet: KD_effect_GO_BP_Upregulated
ID	Description	GeneRatio	BgRatio	pvalue	p.adjust	qvalue	geneID	Count
GO:0006260	DNA replication	47/510	275/17132	1.23383e-22	4.95999e-19	4.60153e-19	BRCA1/POLA2/RFC2/POLQ/MCM10/MCM2/TIPIN/MCM6/POLD3/ORC1/CLSPN/CDC45/CDC6/CDC7/MCM5/RBBP8/POLA1/MCM4/CCNE1/POLD2/MCM3/CDK2/MGME1/E2F8/GINS2/NASP/BRIP1/DSCC1/BARD1/BRCA2/DTL/MMS22L/GINS4/CHEK1/OBI1/CHAF1B/TOPBP1/E2F7/RFWD3/FEN1/RRM2/EXO1/CCNE2/ATAD5/GEN1/GINS3/FAM111B	47
GO:0000082	G1/S transition of mitotic cell cycle	35/510	252/17132	2.80217e-14	3.75491e-11	3.48354e-11	POLA2/FHL1/MCM10/MCM2/MCM6/RBL1/ORC1/CDC45/CDC6/CDC7/MCM5/E2F1/RBBP8/POLA1/MCM4/CCNE1/EZH2/MCM3/E2F3/CDK2/E2F8/NASP/SKP2/CDC25A/E2F7/RFWD3/E2F6/BCL2/RRM2/MTBP/CCNE2/SFN/TYMS/TFDP1/DHFR	35
GO:0000724	double-strand break repair via homologous recombination	26/510	139/17132	5.20708e-14	5.23311e-11	4.85491e-11	BRCA1/POLQ/MCM2/MCM6/RAD54L/CDC45/CDC7/DMC1/MCM5/RBBP8/MCM4/MCM3/XRCC3/AUNIP/GINS2/FIGNL1/BRCA2/MMS22L/GINS4/CHEK1/CGAS/RFWD3/FEN1/GEN1/FIGN/XRCC2	26
GO:0044843	cell cycle G1/S phase transition	35/510	272/17132	2.82885e-13	1.4215e-10	1.31876e-10	POLA2/FHL1/MCM10/MCM2/MCM6/RBL1/ORC1/CDC45/CDC6/CDC7/MCM5/E2F1/RBBP8/POLA1/MCM4/CCNE1/EZH2/MCM3/E2F3/CDK2/E2F8/NASP/SKP2/CDC25A/E2F7/RFWD3/E2F6/BCL2/RRM2/MTBP/CCNE2/SFN/TYMS/TFDP1/DHFR	35
GO:0000083	regulation of transcription involved in G1/S transition of mitotic cell cycle	12/510	34/17132	1.2868e-10	3.97917e-08	3.69159e-08	ORC1/CDC45/CDC6/E2F1/POLA1/CCNE1/E2F7/E2F6/RRM2/TYMS/TFDP1/DHFR	12
GO:0000075	cell cycle checkpoint	25/510	218/17132	8.37239e-09	2.40407e-06	2.23033e-06	BRCA1/TIPIN/ORC1/CLSPN/CDC45/CDC6/MSH2/THOC5/E2F1/TEX14/ZWINT/CDK2/XRCC3/E2F8/BRIP1/DTL/INTS7/CHEK1/PEA15/TOPBP1/E2F7/RFWD3/SFN/GEN1/TFDP1	25
GO:1901990	regulation of mitotic cell cycle phase transition	35/510	410/17132	2.38545e-08	5.99345e-06	5.5603e-06	BRCA1/FHL1/PSME4/CLASP1/RBL1/ORC1/CLSPN/CDC45/CDC6/CDC7/E2F1/EZH2/TEX14/CDK2/XRCC3/E2F8/HAUS2/DTL/CDCA5/HAUS6/CEP78/ANAPC1/TOPBP1/CDC25A/E2F7/RFWD3/BCL2/MTBP/CEP135/SFN/ATAD5/GEN1/TUBB4B/TUBB/TFDP1	35
GO:0031023	microtubule organizing center organization	18/510	137/17132	1.32727e-07	2.66782e-05	2.47501e-05	BRCA1/CLASP1/RANBP1/MDM1/SSX2IP/CDK2/XRCC3/CEP85/HAUS2/BRCA2/HAUS6/CHEK1/SLC16A1/C2CD3/SAC3D1/CEP135/GEN1/XRCC2	18
GO:0045023	G0 to G1 transition	10/510	44/17132	4.99803e-07	7.72772e-05	7.16924e-05	BRCA1/EED/CDC7/E2F1/RBBP8/EZH2/CHEK1/E2F6/RRM2/TFDP1	10
GO:0072331	signal transduction by p53 class mediator	24/510	267/17132	1.58789e-06	0.000220114	0.000204207	E2F2/BRCA1/RFC2/SP100/MSH2/E2F1/RBBP8/PRKAG2/PERP/CDK2/E2F8/BRIP1/BARD1/BRCA2/CHEK1/TOPBP1/E2F7/BCL2/EXO1/SFN/ATAD5/CDK5R1/RPF2/TFDP1	24
GO:0071103	DNA conformation change	28/510	348/17132	1.99391e-06	0.000267184	0.000247875	RFC2/POLQ/PSME4/MCM2/MCM6/DDX1/RAD54L/MCM5/NAA10/MCM4/ASF1B/MCM3/TENT4A/SMC4/HELLS/DNMT1/GINS2/NASP/MBD2/BRIP1/DSCC1/CENPO/CDCA5/GINS4/CENPU/CHAF1B/CENPN/CENPW	28
GO:0048285	organelle fission	33/510	474/17132	5.86635e-06	0.000714628	0.000662982	CLASP1/RAD54L/CDC6/RANBP1/DMC1/VRK1/MYBL2/NAA10/CCNE1/TENT4A/SMC4/MASTL/TEX14/ZWINT/XRCC3/CEP85/FIGNL1/SLF1/LPIN1/BRIP1/DSCC1/BRCA2/CDCA5/CHEK1/ANAPC1/TGFA/PEX11A/MTBP/CCNE2/BNIP3/GEN1/MYBL1/MYO19	33
GO:0044839	cell cycle G2/M phase transition	22/510	269/17132	1.93231e-05	0.00194197	0.00180162	BRCA1/FHL1/PSME4/CLASP1/ORC1/CLSPN/CDC6/CDC7/MASTL/CDK2/HAUS2/DTL/SKP2/HAUS6/CEP78/CHEK1/TOPBP1/CDC25A/CEP135/ATAD5/TUBB4B/TUBB	22
GO:0016446	somatic hypermutation of immunoglobulin genes	5/510	13/17132	2.42032e-05	0.0023731	0.00220159	POLQ/UNG/MSH2/MSH6/EXO1	5
GO:0007059	chromosome segregation	24/510	326/17132	4.57631e-05	0.0039993	0.00371027	BRCA1/CDC6/DMC1/NAA10/CCNE1/TENT4A/SMC4/TTL/TEX14/ZWINT/XRCC3/CEP85/SLF1/BRIP1/DSCC1/CDCA5/NTMT1/ANAPC1/SKA3/CENPN/FEN1/CCNE2/GEN1/CENPW	24
GO:0000086	G2/M transition of mitotic cell cycle	20/510	250/17132	6.2429e-05	0.00522843	0.00485057	BRCA1/FHL1/PSME4/CLASP1/ORC1/CLSPN/CDC6/CDC7/MASTL/CDK2/HAUS2/DTL/SKP2/HAUS6/CEP78/TOPBP1/CDC25A/CEP135/TUBB4B/TUBB	20
GO:0000723	telomere maintenance	15/510	163/17132	0.000109591	0.00881108	0.0081743	POLA2/RFC2/SP100/POLD3/POLA1/CCNE1/POLD2/XRCC3/PKIB/CCT7/BRCA2/CCT8/FEN1/EXO1/CCNE2	15
GO:0140014	mitotic nuclear division	21/510	286/17132	0.000140019	0.0109232	0.0101338	CLASP1/CDC6/RANBP1/VRK1/MYBL2/NAA10/TENT4A/SMC4/TEX14/ZWINT/XRCC3/CEP85/SLF1/LPIN1/DSCC1/CDCA5/CHEK1/ANAPC1/TGFA/MTBP/GEN1	21
GO:0033314	mitotic DNA replication checkpoint	4/510	10/17132	0.000141295	0.0109232	0.0101338	ORC1/CLSPN/CDC6/TOPBP1	4
GO:0090329	regulation of DNA-dependent DNA replication	8/510	53/17132	0.000159194	0.0116356	0.0107947	RFC2/TIPIN/CDC7/CDK2/E2F8/DSCC1/BRCA2/E2F7	8
GO:0072527	pyrimidine-containing compound metabolic process	10/510	83/17132	0.000173521	0.0124563	0.0115561	UNG/CAD/SLC25A19/NEIL2/TET2/CTPS1/TYMS/DCTPP1/TET3/NME1	10
GO:0008630	intrinsic apoptotic signaling pathway in response to DNA damage	11/510	103/17132	0.000246371	0.0165068	0.0153139	BRCA1/MSH2/E2F1/MSH6/BRCA2/EPHA2/DDIAS/BCL2/SFN/ATAD5/IKBKE	11
GO:0032200	telomere organization	15/510	176/17132	0.000256157	0.0168812	0.0156612	POLA2/RFC2/SP100/POLD3/POLA1/CCNE1/POLD2/XRCC3/PKIB/CCT7/BRCA2/CCT8/FEN1/EXO1/CCNE2	15
GO:0009147	pyrimidine nucleoside triphosphate metabolic process	5/510	21/17132	0.000314121	0.0187754	0.0174185	CAD/CTPS1/TYMS/DCTPP1/NME1	5
GO:0051052	regulation of DNA metabolic process	23/510	359/17132	0.000497472	0.0285691	0.0265044	BRCA1/RFC2/POLQ/MSH2/MSH6/CDK2/AUNIP/FIGNL1/SLF1/MBD2/PKIB/CCT7/DSCC1/NVL/CHEK1/CCT8/RNF168/CGAS/CLCF1/ATAD5/FIGN/TFDP1/PAM16	23
GO:0097711	ciliary basal body-plasma membrane docking	10/510	95/17132	0.000524842	0.0293037	0.0271859	CLASP1/HAUS2/HAUS6/CEP78/C2CD3/IQCB1/CEP135/KIF24/TUBB4B/TUBB	10
GO:0051302	regulation of cell division	14/510	170/17132	0.000575576	0.0308509	0.0286213	KLHL13/YBX1/RBL1/CDC6/ITGB1BP1/TEX14/E2F8/BRCA2/TGFA/INTU/SHH/E2F7/SFN/MYO19	14
GO:0031123	RNA 3'-end processing	13/510	153/17132	0.000667854	0.0344202	0.0319326	THOC3/THOC5/TENT4A/EXOSC9/EXOSC2/WDR33/NCBP1/PNPT1/BARD1/INTS7/POLR2D/SRSF2/POLR3K	13
GO:0033045	regulation of sister chromatid segregation	9/510	82/17132	0.000728748	0.0362824	0.0336602	CDC6/NAA10/TEX14/XRCC3/SLF1/CDCA5/ANAPC1/FEN1/GEN1	9
GO:0045190	isotype switching	7/510	51/17132	0.000740088	0.0362824	0.0336602	UNG/MSH2/MSH6/RNF168/EXO1/CLCF1/ATAD5	7
GO:0060249	anatomical structure homeostasis	27/510	467/17132	0.000823773	0.0398953	0.037012	POLA2/SPATA7/RFC2/SP100/POLD3/FH/POLA1/CCNE1/POLD2/NCS1/MDM1/XRCC3/PKIB/CCT7/BARD1/BRCA2/LPCAT1/CCT8/TFF3/TFF1/AZGP1/CFL2/FEN1/BCL2/IQCB1/EXO1/CCNE2	27
GO:1900739	regulation of protein insertion into mitochondrial membrane involved in apoptotic signaling pathway	5/510	26/17132	0.000898086	0.0414978	0.0384987	E2F1/BCL2/SFN/TFDP1/PPP3R1	5
GO:1900740	positive regulation of protein insertion into mitochondrial membrane involved in apoptotic signaling pathway	5/510	26/17132	0.000898086	0.0414978	0.0384987	E2F1/BCL2/SFN/TFDP1/PPP3R1	5
GO:0009411	response to UV	12/510	140/17132	0.000984679	0.0448174	0.0415784	MAP4K3/TIPIN/POLD3/MSH2/MSH6/BRCA2/DTL/CHEK1/CDC25A/FEN1/BCL2/COPS9	12
GO:0051983	regulation of chromosome segregation	10/510	103/17132	0.000992225	0.0448174	0.0415784	CDC6/NAA10/TTL/TEX14/XRCC3/SLF1/CDCA5/ANAPC1/FEN1/GEN1	10
GO:0098813	nuclear chromosome segregation	18/510	266/17132	0.00106777	0.0471698	0.0437608	CDC6/DMC1/NAA10/CCNE1/TENT4A/SMC4/TTL/TEX14/ZWINT/XRCC3/SLF1/BRIP1/DSCC1/CDCA5/ANAPC1/FEN1/CCNE2/GEN1	18
GO:0007088	regulation of mitotic nuclear division	13/510	162/17132	0.00113661	0.0496648	0.0460755	CDC6/RANBP1/NAA10/TEX14/XRCC3/CEP85/SLF1/CDCA5/CHEK1/ANAPC1/TGFA/MTBP/GEN1	13

## Sheet: KD_effect_GO_BP_Downregulated
ID	Description	GeneRatio	BgRatio	pvalue	p.adjust	qvalue	geneID	Count
GO:0006334	nucleosome assembly	27/436	141/17132	1.92606e-16	8.1954e-13	7.40217e-13	H1-3/H2BC5/H4C8/H2BC4/H3C13/TSPYL2/H2BC21/H2BC13/H1-2/TSPYL1/H2BU1/H3C12/H4-16/H2BC12/H2BC18/H2BC15/H2BC8/H3C8/H2BC6/H3C6/H2BC9/H4C9/H4C5/H2BC7/H3C7/H3C10/H3C2	27
GO:0034728	nucleosome organization	27/436	179/17132	9.02882e-14	1.28059e-10	1.15664e-10	H1-3/H2BC5/H4C8/H2BC4/H3C13/TSPYL2/H2BC21/H2BC13/H1-2/TSPYL1/H2BU1/H3C12/H4-16/H2BC12/H2BC18/H2BC15/H2BC8/H3C8/H2BC6/H3C6/H2BC9/H4C9/H4C5/H2BC7/H3C7/H3C10/H3C2	27
GO:0006323	DNA packaging	28/436	235/17132	1.1533e-11	9.81457e-09	8.86462e-09	H1-3/H2BC5/H4C8/PHF8/H2BC4/H3C13/TSPYL2/H2BC21/H2BC13/H1-2/TSPYL1/H2BU1/H3C12/H4-16/H2BC12/H2BC18/H2BC15/H2BC8/H3C8/H2BC6/H3C6/H2BC9/H4C9/H4C5/H2BC7/H3C7/H3C10/H3C2	28
GO:0065004	protein-DNA complex assembly	28/436	238/17132	1.56764e-11	1.11172e-08	1.00411e-08	ESR1/H1-3/H2BC5/H4C8/H2BC4/H3C13/TSPYL2/H2BC21/H2BC13/H1-2/TSPYL1/H2BU1/H3C12/H4-16/H2BC12/H2BC18/H2BC15/H2BC8/H3C8/H2BC6/H3C6/H2BC9/H4C9/H4C5/H2BC7/H3C7/H3C10/H3C2	28
GO:0071824	protein-DNA complex subunit organization	29/436	277/17132	1.18134e-10	7.18086e-08	6.48583e-08	ESR1/H1-3/MYC/H2BC5/H4C8/H2BC4/H3C13/TSPYL2/H2BC21/H2BC13/H1-2/TSPYL1/H2BU1/H3C12/H4-16/H2BC12/H2BC18/H2BC15/H2BC8/H3C8/H2BC6/H3C6/H2BC9/H4C9/H4C5/H2BC7/H3C7/H3C10/H3C2	29
GO:0000183	rDNA heterochromatin assembly	12/436	40/17132	1.8611e-10	9.89875e-08	8.94065e-08	H4C8/PHF8/H3C13/H3C12/H4-16/H3C8/H3C6/H4C9/H4C5/H3C7/H3C10/H3C2	12
GO:0045814	negative regulation of gene expression, epigenetic	19/436	121/17132	2.20058e-10	1.04039e-07	9.39687e-08	H1-3/H4C8/MTHFR/H3C13/H2AC21/H1-2/H2AC13/H2AC11/H3C12/H4-16/H3C8/H3C6/H4C9/H4C5/H2AC8/PCGF2/H3C7/H3C10/H3C2	19
GO:0045652	regulation of megakaryocyte differentiation	16/436	83/17132	2.5544e-10	1.0869e-07	9.81698e-08	SCIN/KAT2B/MOV10/H4C8/GATA2/ZFPM1/H3C13/H3C12/H4-16/H3C8/H3C6/H4C9/H4C5/H3C7/H3C10/H3C2	16
GO:0030219	megakaryocyte differentiation	16/436	101/17132	5.19391e-09	1.38126e-06	1.24756e-06	SCIN/KAT2B/MOV10/H4C8/GATA2/ZFPM1/H3C13/H3C12/H4-16/H3C8/H3C6/H4C9/H4C5/H3C7/H3C10/H3C2	16
GO:0060562	epithelial tube morphogenesis	25/436	327/17132	1.09024e-06	0.000210863	0.000190453	LRP2/ESR1/SALL4/CTSH/GATA3/HES1/FOXP1/KDM5B/CXCR4/WNK4/SIX1/KDR/FOXA1/TBX3/MYC/LMO4/SLIT2/EOMES/SPRY1/SMAD3/GDNF/MTHFR/DEAF1/PRKX/LHX1	25
GO:0010632	regulation of epithelial cell migration	20/436	224/17132	1.23517e-06	0.000228507	0.00020639	ITGA3/VASH1/FGFR1/EPB41L4B/CTSH/GATA3/SASH1/SPARC/FOXP1/GADD45A/VIL1/KDR/IQSEC1/SLIT2/PLK2/EFNA1/MMRN2/JUP/GATA2/SYNJ2BP	20
GO:0010631	epithelial cell migration	23/436	287/17132	1.31906e-06	0.000233858	0.000211223	ITGA3/VASH1/FGFR1/EPB41L4B/CTSH/GATA3/SASH1/SPARC/FOXP1/GADD45A/LGALS8/VIL1/KDR/IQSEC1/SLIT2/PLK2/MIA3/EFNA1/MMRN2/JUP/GATA2/PRKX/SYNJ2BP	23
GO:0090132	epithelium migration	23/436	290/17132	1.57692e-06	0.000268392	0.000242414	ITGA3/VASH1/FGFR1/EPB41L4B/CTSH/GATA3/SASH1/SPARC/FOXP1/GADD45A/LGALS8/VIL1/KDR/IQSEC1/SLIT2/PLK2/MIA3/EFNA1/MMRN2/JUP/GATA2/PRKX/SYNJ2BP	23
GO:0002385	mucosal immune response	8/436	38/17132	4.12799e-06	0.000627307	0.00056659	RAB17/H2BC4/H2BC21/H2BC12/OTUD7B/H2BC8/H2BC6/H2BC7	8
GO:0038111	interleukin-7-mediated signaling pathway	7/436	30/17132	8.07945e-06	0.00104176	0.000940927	H3C13/H3C12/H3C8/H3C6/H3C7/H3C10/H3C2	7
GO:0001655	urogenital system development	23/436	329/17132	1.28523e-05	0.00140222	0.0012665	ITGA3/FGFR1/ESR1/CTSH/GATA3/HES1/EGR1/WNK4/SIX1/FOXA1/CASP9/EPHB2/MYC/TFAP2A/SLIT2/SPRY1/SMAD3/GDNF/LAMB2/GATA2/PRKX/RXRA/LHX1	23
GO:1990778	protein localization to cell periphery	23/436	339/17132	2.07396e-05	0.00210112	0.00189775	ITGA3/EPHA3/PKP2/ATP2C2/PPP2R5A/PRKCZ/LIN7A/ACSL3/VIL1/INPP5K/EPHB2/TMBIM1/STXBP1/SYTL2/ADAM10/ATP1B1/RILPL2/ZDHHC7/NFASC/RAB26/CLSTN1/JUP/NHLRC1	23
GO:0045475	locomotor rhythm	5/436	15/17132	2.53747e-05	0.00251091	0.00226788	USP2/NAGLU/EGR1/NCOA2/CIART	5
GO:0002227	innate immune response in mucosa	6/436	26/17132	3.92101e-05	0.00363528	0.00328342	H2BC4/H2BC21/H2BC12/H2BC8/H2BC6/H2BC7	6
GO:0001763	morphogenesis of a branching structure	16/436	198/17132	4.88416e-05	0.00442172	0.00399374	FGFR1/ESR1/CTSH/KDM5B/SIX1/KDR/FOXA1/TBX3/MYC/SLIT2/FZD5/SPRY1/GDNF/RXRA/TGM2/LHX1	16
GO:0098760	response to interleukin-7	7/436	42/17132	8.22693e-05	0.00686384	0.00619949	H3C13/H3C12/H3C8/H3C6/H3C7/H3C10/H3C2	7
GO:0010717	regulation of epithelial to mesenchymal transition	10/436	90/17132	9.55816e-05	0.00782115	0.00706414	EPHA3/BAMBI/GATA3/GCNT2/TGFB3/FOXA1/SPRY1/SMAD3/EFNA1/BCL9L	10
GO:0031647	regulation of protein stability	19/436	288/17132	0.000154874	0.0122035	0.0110223	USP2/PER3/SEL1L/SREBF1/USP40/CTSH/P3H1/STX12/TRIM24/PEX6/RNF128/STXBP1/PIM1/ATP1B1/GNAQ/SMAD3/COG7/EFNA1/USP19	19
GO:0048839	inner ear development	15/436	198/17132	0.000171724	0.0132852	0.0119993	FGFR1/PVALB/GATA3/NAGLU/LIN7A/SPARC/HES1/TGFB3/SIX1/EPHB2/TFAP2A/ADAM10/ZIC1/GATA2/LRP10	15
GO:0001657	ureteric bud development	10/436	98/17132	0.000195384	0.0145852	0.0131735	FGFR1/GATA3/HES1/SIX1/MYC/SLIT2/SPRY1/SMAD3/GDNF/LHX1	10
GO:0001837	epithelial to mesenchymal transition	12/436	143/17132	0.000298267	0.0194928	0.017606	EPHA3/FGFR1/BAMBI/GATA3/GCNT2/TGFB3/FOXA1/EOMES/SPRY1/SMAD3/EFNA1/BCL9L	12
GO:1904375	regulation of protein localization to cell periphery	11/436	123/17132	0.000305554	0.0194928	0.017606	ITGA3/EPHA3/PPP2R5A/PRKCZ/ACSL3/VIL1/EPHB2/TMBIM1/ADAM10/ZDHHC7/NHLRC1	11
GO:0110110	positive regulation of animal organ morphogenesis	9/436	85/17132	0.000306936	0.0194928	0.017606	FGFR1/GATA3/SIX1/MYC/PIM1/TFAP2A/SPRY1/GDNF/LHX1	9
GO:0001933	negative regulation of protein phosphorylation	23/436	407/17132	0.00032311	0.0199251	0.0179965	PRKAR2B/PRKCZ/AMBP/PRKAR1A/NNT/KAT2B/CBLB/GADD45A/INPP5K/EPHB2/MYC/SORL1/CTDSP1/SLIT2/PTPRJ/GNAQ/CAMK2N1/SPRY1/SMPD1/EFNA1/TRIB1/HEXIM1/SYNJ2BP	23
GO:0019731	antibacterial humoral response	7/436	55/17132	0.000465769	0.0265973	0.024023	H2BC4/H2BC21/H2BC12/ANG/H2BC8/H2BC6/H2BC7	7
GO:0042326	negative regulation of phosphorylation	24/436	445/17132	0.000474234	0.0265973	0.024023	PRKAR2B/PPP2R5A/PRKCZ/AMBP/PRKAR1A/NNT/KAT2B/CBLB/GADD45A/INPP5K/EPHB2/MYC/SORL1/CTDSP1/SLIT2/PTPRJ/GNAQ/CAMK2N1/SPRY1/SMPD1/EFNA1/TRIB1/HEXIM1/SYNJ2BP	24
GO:0003281	ventricular septum development	8/436	74/17132	0.000572371	0.0297005	0.0268257	LRP2/SALL4/GATA3/HES1/TBX3/LMO4/SLIT2/ZFPM1	8
GO:0048311	mitochondrion distribution	4/436	16/17132	0.000590472	0.0299102	0.0270152	MEF2A/MTM1/TRAK1/SYNJ2BP	4
GO:0071391	cellular response to estrogen stimulus	4/436	16/17132	0.000590472	0.0299102	0.0270152	ESR1/TRIM24/WBP2/SERPINB9	4
GO:1901888	regulation of cell junction assembly	14/436	200/17132	0.000622814	0.0311773	0.0281597	EPHA3/LIMCH1/RAB17/SIX1/KDR/EPHB2/AMIGO2/PTPRJ/CLSTN2/FZD5/SMAD3/CLSTN1/EFNA5/SLIT1	14
GO:1902652	secondary alcohol metabolic process	12/436	156/17132	0.000656589	0.0324859	0.0293416	LIMA1/IDH3G/SREBF1/FGFR1/CYB5R3/LMF1/LPCAT3/EPHX2/ABCG1/SMPD1/ACAA2/RXRA	12
GO:0030540	female genitalia development	4/436	17/17132	0.000756731	0.0368614	0.0332935	LRP2/ESR1/TBX3/LHX1	4
GO:0007517	muscle organ development	21/436	382/17132	0.000827908	0.0395814	0.0357503	USP2/PKP2/ERBB3/MEF2A/FGFR1/LRP2/EGR1/SIX1/PIM1/AKAP6/DISP1/CXADR/BTG2/EOMES/SMAD3/MTM1/USP19/ZFPM1/ZBTB42/BCL9L/RXRA	21
GO:0051348	negative regulation of transferase activity	17/436	281/17132	0.00090511	0.0427916	0.0386498	PRKAR2B/PPP2R5A/PRKAR1A/KAT2B/CBLB/GADD45A/INPP5K/EPHB2/SORL1/PTPRJ/GNAQ/CAMK2N1/DTX3L/SPRY1/SMPD1/TRIB1/HEXIM1	17
GO:0060191	regulation of lipase activity	9/436	99/17132	0.000944568	0.0438772	0.0396303	SELE/PRKCZ/FGFR1/ESR1/LMF1/PCSK6/PLA2R1/GNAQ/ANG	9
GO:0014706	striated muscle tissue development	20/436	364/17132	0.00109965	0.0497768	0.0449589	PKP2/ERBB3/MEF2A/FGFR1/LRP2/PRKAR1A/EGR1/SIX1/TBX3/PIM1/AKAP6/CXADR/BTG2/EOMES/SMAD3/MTM1/USP19/ZFPM1/BCL9L/RXRA	20
